# Supplementary material for: Use Internet search data to accurately track state level influenza epidemics
Source: PubMed Central journal article supplement (PMC7889878; doi:10.1038/s41598-021-83084-5), 2021-02-17
Supplement: 41598_2021_83084_MOESM1_ESM.pdf [file 41598_2021_83084_MOESM1_ESM.pdf]

# Supporting Information for Use Internet Search Data to Accurately Track State Level Influenza Epidemics

Shihao Yang, Shaoyang Ning, S. C. Kou

Correspondence to: kou@stat.harvard.edu

This PDF file includes:

- Supplementary Text
- Supplementary Figs. S1 to S51
- Supplementary Tables S1 to S55

This Supplementary Material is organized as following: (1) the detailed calculation procedure for the multiple correlation behind the stand-alone modeling of HI, AK, ND, VT, MT, ME, and SD is presented; (2) a table for the confidence interval coverage is presented; (3) all the Google query terms used in this study are listed; (4) Google Trends data quality at different geographic area is studied; (5) full comparison to another Google-search-based benchmark method is presented; (6) detailed estimation results for each of 51 studied states/district/city are reported in tables and plotted in figures.

## Multiple correlation

For each state, the multiple correlation of its flu activity level to the other states', other regions' and the national flu activity levels is calculated as follows. First, the states of HI and AK are excluded because they are not part of the contiguous US; the state of FL is excluded because FL data is not available from CDC. Then for the in-sample time period of 2010-10-09 to 2014-09-27, we regress each state's %ILI to (i) all other 48 states' %ILI (including DC and NYC but excluding FL, HI, and AK), (ii) all the other 9 regions' %ILI (i.e., regions other than the one that the specific state belongs to), and (iii) the national %ILI. After the regression, we obtain the R-squared, which is the square of multiple correlation. The five states with the lowest multiple correlations are ND, VT, MT, ME, and SD. We, therefore, would not use spatial pooling on HI, AK, ND, VT, MT, ME, and SD. Instead, we only use the state-specific data together with national level data for cross-resolution boosting on those seven aforementioned states in the second step of ARGOX.

## Confidence interval coverage

We study the goodness of our confidence intervals by examining its actual coverage (coverage of the actual %ILI released by CDC weeks later). The result is shown in Table S1. In general, the coverage of 95% confidence interval is quite close to the nominal value, suggesting that our model quantifies the uncertainty reasonably well.

|       |       |       |       |       |       |       |       |       |       |
|-------|-------|-------|-------|-------|-------|-------|-------|-------|-------|
| AL    | AK    | AZ    | AR    | CA    | CO    | CT    | DE    | DC    | GA    |
| 0.919 | 0.916 | 0.909 | 0.930 | 0.944 | 0.905 | 0.909 | 0.930 | 0.923 | 0.926 |
| HI    | ID    | IL    | IN    | IA    | KS    | KY    | LA    | ME    | MD    |
| 0.947 | 0.958 | 0.930 | 0.926 | 0.926 | 0.940 | 0.867 | 0.916 | 0.916 | 0.947 |
| MA    | MI    | MN    | MS    | MO    | MT    | NE    | NV    | NH    | NJ    |
| 0.937 | 0.947 | 0.940 | 0.930 | 0.923 | 0.937 | 0.909 | 0.916 | 0.898 | 0.930 |
| NM    | NY    | NC    | ND    | OH    | OK    | OR    | PA    | RI    | SC    |
| 0.933 | 0.902 | 0.951 | 0.944 | 0.926 | 0.937 | 0.926 | 0.930 | 0.909 | 0.926 |
| SD    | TN    | TX    | UT    | VT    | VA    | WA    | WV    | WI    | WY    |
| 0.940 | 0.919 | 0.926 | 0.898 | 0.947 | 0.951 | 0.905 | 0.909 | 0.937 | 0.874 |
| NYC   |       |       |       |       |       |       |       |       |       |
| 0.912 |       |       |       |       |       |       |       |       |       |

**Table S1.** The actual coverage of the confidence intervals by ARGOX for 51 states/district/city. The coverage is for 95% nominal confidence level. The average coverage over all the 51 states/district/city is 92.5%.

## Query terms for Google Trends

Table S2 lists all query terms/phrases used in this study. Most of them are taken from previous studies<sup>9,22</sup> with a few additional terms identified through “Related topics” and “Related queries” from Google Trends when search for flu-related information.

**Table S2.** All search query terms used in this study. The last 21 terms separated by a horizontal line from the first 140 terms are new “Related topics” and “Related queries” identified from Google Trends.

|                              |                                 |                           |                                       |
|------------------------------|---------------------------------|---------------------------|---------------------------------------|
| flu incubation               | flu incubation period           | influenza type a          | symptoms of the flu                   |
| flu symptoms                 | influenza symptoms              | flu contagious            | influenza a                           |
| a influenza                  | symptoms of flu                 | flu duration              | influenza incubation                  |
| type a influenza             | flu treatment                   | symptoms of influenza     | influenza contagious                  |
| flu in children              | cold or flu                     | symptoms of bronchitis    | flu recovery                          |
| tessalon                     | influenza incubation period     | symptoms of pneumonia     | tussionex                             |
| signs of the flu             | flu treatments                  | remedies for the flu      | walking pneumonia                     |
| flu test                     | tussin                          | upper respiratory         | respiratory flu                       |
| acute bronchitis             | bronchitis                      | sinus infections          | flu relief                            |
| painful cough                | how long does the flu last      | flu cough                 | sinus                                 |
| expectorant                  | strep                           | strep throat              | influenza treatment                   |
| flu reports                  | flu remedy                      | robitussin                | rapid flu                             |
| treatment for the flu        | chest cold                      | cough fever               | oscillococcinum                       |
| flu fever                    | treat the flu                   | how to treat the flu      | over the counter flu                  |
| how long is the flu          | flu medicine                    | flu or cold               | normal body                           |
| is flu contagious            | treat flu                       | body temperature          | reduce fever                          |
| flu vs cold                  | how long is the flu contagious  | fever reducer             | get over the flu                      |
| treating flu                 | having the flu                  | treatment for flu         | human temperature                     |
| dangerous fever              | the flu                         | remedies for flu          | influenza a and b                     |
| contagious flu               | fever flu                       | flu remedies              | how long is flu contagious            |
| cold vs flu                  | braun thermoscan                | fever cough               | signs of flu                          |
| how long does flu last       | normal body temperature         | get rid of the flu        | i have the flu                        |
| taking temperature           | flu versus cold                 | how long flu              | flu germs                             |
| flu and cold                 | thermoscan                      | flu complications         | high fever                            |
| flu children                 | the flu virus                   | how to treat flu          | pneumonia                             |
| flu headache                 | ear thermometer                 | how to get rid of the flu | flu how long                          |
| cold and flu                 | over the counter flu medicine   | treating the flu          | flu care                              |
| how long contagious          | fight the flu                   | reduce a fever            | cure the flu                          |
| medicine for flu             | flu length                      | cure flu                  | exposed to flu                        |
| low body                     | early flu symptoms              | flu report                | incubation period for flu             |
| break a fever                | flu contagious period           | cold versus flu           | what to do if you have the flu        |
| medicine for the flu         | flu and fever                   | flu lasts                 | incubation period for the flu         |
| do i have the flu            | type a flu symptoms             | flu texas                 | how long am i contagious with the flu |
| how to break a fever         | fever breaks                    | type a flu                | how to bring a fever down             |
| how to treat the flu at home | flu how long are you contagious | flu a symptoms            | flu                                   |
| Influenza vaccine            | Influenza                       | Fever                     | Influenza A virus                     |
| Influenza B virus            | Common cold                     | Cough                     | Sore throat                           |
| Virus                        | Avian influenza                 | Spanish flu               | Headache                              |
| Nausea                       | Flu season                      | Oseltamivir               | Nasal congestion                      |
| Canine influenza             | Rapid influenza diagnostic test | Theraflu                  | Dextromethorphan                      |
| Rhinorrhea                   |                                 |                           |                                       |

### Google Trends data quality

As stated at [trends.google.com](https://trends.google.com), the numbers in Google Trends “represent search interest relative to the highest point on the chart for the given region and time; a value of 100 is the peak popularity for the term; a value of 50 means that the term is half as popular; a score of 0 means there was not enough data for this term.” As such, the proportion of zeros in the Google Trends data reflects the data quality: higher proportion of zeros indicates lower quality of Google Trends data. Table S3 summarizes the average proportion of zeros for the query terms listed in Table S2 in each of the geographic areas. As we can see, Google Trends data at the US national level have far fewer zeros than any of the states, implying a significant drop in quality from national-level data to state-level data.

**Table S3.** Average proportion of zeros in Google Trends data for the query terms in Table S2. Higher proportion of zeros indicates lower quality of Google Trends data since “a score of 0 means there was not enough data for this term” ([trends.google.com](https://trends.google.com)). The proportion of zeros in Google Trends at the US national level is in the upper sub-table, while the proportions of zeros at state/district/city level are in the lower sub-table.

|        |        |        |        |        |        |        |        |        |        | US National         |
|--------|--------|--------|--------|--------|--------|--------|--------|--------|--------|---------------------|
|        |        |        |        |        |        |        |        |        |        | proportion of zeros |
|        |        |        |        |        |        |        |        |        |        | 1.37%               |
| AK     | AL     | AR     | AZ     | CA     | CO     | CT     | DC     | DE     | FL     |                     |
| 78.33% | 46.13% | 56.16% | 39.53% | 13.52% | 42.77% | 50.99% | 63.00% | 73.34% | 20.93% |                     |
| GA     | HI     | IA     | ID     | IL     | IN     | KS     | KY     | LA     | MA     |                     |
| 29.86% | 67.14% | 54.90% | 64.58% | 26.39% | 40.78% | 55.50% | 47.06% | 48.70% | 37.68% |                     |
| MD     | ME     | MI     | MN     | MO     | MS     | MT     | NC     | ND     | NE     |                     |
| 41.26% | 67.47% | 31.78% | 41.99% | 40.67% | 56.99% | 73.07% | 30.69% | 75.61% | 59.34% |                     |
| NH     | NJ     | NM     | NV     | NY     | OH     | OK     | OR     | PA     | RI     |                     |
| 67.21% | 34.86% | 63.73% | 55.14% | 18.92% | 30.64% | 50.78% | 48.99% | 30.17% | 69.28% |                     |
| SC     | SD     | TN     | TX     | UT     | VA     | VT     | WA     | WI     | WV     |                     |
| 45.97% | 74.43% | 38.48% | 16.77% | 52.78% | 32.98% | 77.42% | 37.85% | 42.78% | 64.07% |                     |
| WY     | NYC    |        |        |        |        |        |        |        |        |                     |
| 79.82% | 18.25% |        |        |        |        |        |        |        |        |                     |

### More comparison with the result of Lu et al. (2019)

Lu et al. (2019)<sup>21</sup> proposed another Google-search-based method for state-level influenza tracking, utilizing a network approach. We compare ARGOX with Lu et al. (2019) together with other methods here. The retrospective results of Lu et al. (2019) are available for seasons 2014-15, 2015-16, and 2016-17, and it only studied 37 selected states, which are: AK, AL, AR, AZ, DE, GA, ID, KS, KY, LA, MA, MD, ME, MI, MN, NC, ND, NE, NH, NJ, NM, NV, NY, OH, OR, PA, RI, SC, SD, TN, TX, UT, VA, VT, WA, WI, WV. For completeness, ARGOX, VAR, GFT, and the naive method are compared here for the same period and for the same 37 states. Overall ARGOX takes the lead in this subset of 37 states for all three seasons of 2014-15, 2015-16 and 2016-17.

|                  | Overall '14-'17 | '14-'15      | '15-'16      | '16-'17      |
|------------------|-----------------|--------------|--------------|--------------|
| MSE              |                 |              |              |              |
| ARGOX            | <b>0.269</b>    | <b>0.406</b> | <b>0.163</b> | <b>0.339</b> |
| VAR              | 0.873           | 1.234        | 0.503        | 1.214        |
| GFT              | –               | 1.464        | –            | –            |
| Lu et al. (2019) | 0.418           | 0.467        | 0.528        | 0.544        |
| naive            | 0.383           | 0.618        | 0.201        | 0.471        |
| Correlation      |                 |              |              |              |
| ARGOX            | <b>0.919</b>    | 0.914        | <b>0.836</b> | <b>0.890</b> |
| VAR              | 0.808           | 0.809        | 0.684        | 0.754        |
| GFT              | –               | <b>0.915</b> | –            | –            |
| Lu et al. (2019) | 0.912           | 0.912        | 0.808        | 0.858        |
| naive            | 0.894           | 0.880        | 0.806        | 0.860        |

**Table S4.** Comparison of different methods for state-level %ILI estimation, averaging over the 37 states, for the period of 2014 to 2017, due to the availability of Lu et al. (2019). The MSE and Correlation are reported. The method with the best performance is highlighted in boldface for each metric in each period. Methods considered here include ARGOX, VAR, GFT, Lu et al. (2019), and the naive method.

### Detailed estimation results for each state/district/city

|                    | Whole period '14-'20 | Overall '14-'17 | '14-'15      | '15-'16      | '16-'17      | '17-'18      | '18-'19      | '19-'20      |
|--------------------|----------------------|-----------------|--------------|--------------|--------------|--------------|--------------|--------------|
| <b>MSE</b>         |                      |                 |              |              |              |              |              |              |
| ARGOX              | <b>0.726</b>         | <b>1.121</b>    | 2.819        | 0.369        | <b>0.321</b> | <b>0.773</b> | <b>0.267</b> | <b>0.692</b> |
| VAR                | 1.214                | 1.378           | 2.617        | 0.551        | 1.226        | 1.611        | 1.650        | 1.553        |
| GFT                | –                    | –               | 7.441        | –            | –            | –            | –            | –            |
| Lu et al. (2019)   | –                    | 4.875           | <b>2.509</b> | 12.152       | 3.437        | –            | –            | –            |
| naive              | 1.233                | 1.792           | 4.594        | <b>0.349</b> | 0.691        | 1.678        | 0.616        | 1.156        |
| <b>MAE</b>         |                      |                 |              |              |              |              |              |              |
| ARGOX              | <b>0.469</b>         | <b>0.608</b>    | <b>1.022</b> | 0.472        | <b>0.444</b> | <b>0.440</b> | <b>0.328</b> | <b>0.635</b> |
| VAR                | 0.707                | 0.801           | 1.055        | 0.629        | 0.861        | 0.780        | 0.788        | 0.912        |
| GFT                | –                    | –               | 1.750        | –            | –            | –            | –            | –            |
| Lu et al. (2019)   | –                    | –               | –            | –            | –            | –            | –            | –            |
| naive              | 0.593                | 0.709           | 1.200        | <b>0.444</b> | 0.639        | 0.738        | 0.573        | 0.812        |
| <b>Correlation</b> |                      |                 |              |              |              |              |              |              |
| ARGOX              | <b>0.954</b>         | <b>0.928</b>    | 0.917        | 0.826        | 0.955        | <b>0.974</b> | <b>0.969</b> | <b>0.929</b> |
| VAR                | 0.929                | 0.912           | 0.924        | 0.844        | 0.883        | 0.959        | 0.906        | 0.846        |
| GFT                | –                    | –               | <b>0.963</b> | –            | –            | –            | –            | –            |
| Lu et al. (2019)   | –                    | 0.885           | 0.924        | 0.683        | <b>0.969</b> | –            | –            | –            |
| naive              | 0.923                | 0.888           | 0.867        | <b>0.851</b> | 0.906        | 0.942        | 0.925        | 0.883        |

**Table S5.** Comparison of different methods for state-level %ILI estimation in Alabama (AL). The MSE, MAE, and correlation are reported. The method with the best performance is highlighted in boldface for each metric in each period.

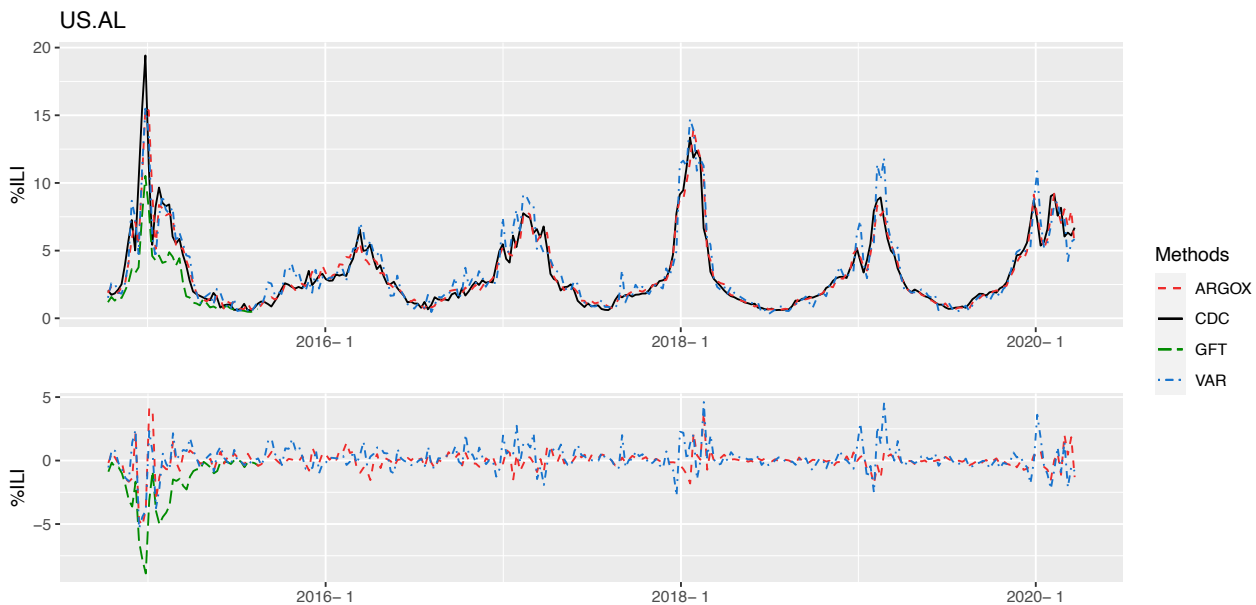

**Figure S1.** Plots of the %ILI estimates (top) and the estimation errors (bottom) for Alabama (AL).

|                    | Whole period '14-'20 | Overall '14-'17 | '14-'15      | '15-'16      | '16-'17      | '17-'18      | '18-'19      | '19-'20      |
|--------------------|----------------------|-----------------|--------------|--------------|--------------|--------------|--------------|--------------|
| <b>MSE</b>         |                      |                 |              |              |              |              |              |              |
| ARGOX              | <b>0.911</b>         | <b>0.475</b>    | <b>0.381</b> | 0.695        | <b>0.490</b> | <b>0.371</b> | <b>1.217</b> | <b>4.487</b> |
| VAR                | 4.902                | 4.659           | 6.417        | 4.153        | 5.154        | 10.475       | 2.379        | 8.727        |
| GFT                | –                    | –               | 0.918        | –            | –            | –            | –            | –            |
| Lu et al. (2019)   | –                    | 0.510           | 0.450        | <b>0.692</b> | 0.602        | –            | –            | –            |
| naive              | 0.996                | 0.534           | 0.395        | 0.710        | 0.612        | 0.404        | 1.269        | 4.898        |
| <b>MAE</b>         |                      |                 |              |              |              |              |              |              |
| ARGOX              | <b>0.591</b>         | <b>0.477</b>    | <b>0.459</b> | <b>0.565</b> | <b>0.520</b> | <b>0.493</b> | <b>0.768</b> | <b>1.310</b> |
| VAR                | 1.338                | 1.299           | 1.332        | 1.331        | 1.546        | 2.094        | 1.128        | 1.768        |
| GFT                | –                    | –               | 0.780        | –            | –            | –            | –            | –            |
| Lu et al. (2019)   | –                    | –               | –            | –            | –            | –            | –            | –            |
| naive              | 0.619                | 0.510           | 0.461        | 0.596        | 0.604        | 0.504        | 0.821        | 1.326        |
| <b>Correlation</b> |                      |                 |              |              |              |              |              |              |
| ARGOX              | <b>0.872</b>         | <b>0.805</b>    | 0.746        | 0.815        | <b>0.800</b> | <b>0.923</b> | 0.879        | <b>0.564</b> |
| VAR                | 0.593                | 0.291           | 0.166        | 0.363        | 0.227        | 0.380        | 0.754        | 0.457        |
| GFT                | –                    | –               | 0.638        | –            | –            | –            | –            | –            |
| Lu et al. (2019)   | –                    | 0.781           | 0.723        | 0.815        | 0.750        | –            | –            | –            |
| naive              | 0.865                | 0.797           | <b>0.762</b> | <b>0.820</b> | 0.769        | 0.912        | <b>0.880</b> | 0.555        |

**Table S6.** Comparison of different methods for state-level %ILI estimation in Alaska (AK). The MSE, MAE, and correlation are reported. The method with the best performance is highlighted in boldface for each metric in each period.

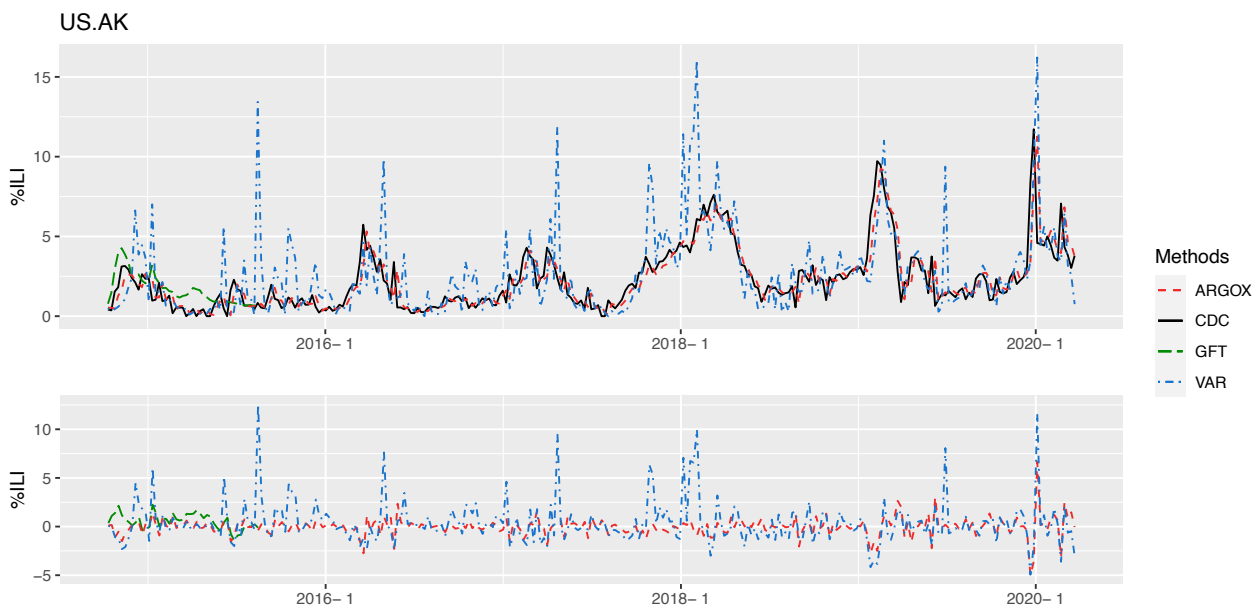

**Figure S2.** Plots of the %ILI estimates (top) and the estimation errors (bottom) for Alaska (AK).

|                    | Whole period '14-'20 | Overall '14-'17 | '14-'15      | '15-'16      | '16-'17      | '17-'18      | '18-'19      | '19-'20      |
|--------------------|----------------------|-----------------|--------------|--------------|--------------|--------------|--------------|--------------|
| <b>MSE</b>         |                      |                 |              |              |              |              |              |              |
| ARGOX              | <b>0.151</b>         | <b>0.093</b>    | 0.064        | <b>0.157</b> | 0.098        | <b>0.418</b> | <b>0.094</b> | <b>0.208</b> |
| VAR                | 0.663                | 0.188           | 0.062        | 0.270        | 0.362        | 3.360        | 0.262        | 0.781        |
| GFT                | –                    | –               | 1.213        | –            | –            | –            | –            | –            |
| Lu et al. (2019)   | –                    | 0.126           | <b>0.052</b> | 0.237        | 0.139        | –            | –            | –            |
| naive              | 0.185                | 0.095           | 0.070        | 0.161        | <b>0.092</b> | 0.602        | 0.132        | 0.276        |
| <b>MAE</b>         |                      |                 |              |              |              |              |              |              |
| ARGOX              | <b>0.282</b>         | <b>0.218</b>    | <b>0.174</b> | <b>0.291</b> | 0.254        | <b>0.480</b> | <b>0.257</b> | <b>0.385</b> |
| VAR                | 0.459                | 0.319           | 0.199        | 0.376        | 0.497        | 0.999        | 0.403        | 0.543        |
| GFT                | –                    | –               | 0.940        | –            | –            | –            | –            | –            |
| Lu et al. (2019)   | –                    | –               | –            | –            | –            | –            | –            | –            |
| naive              | 0.297                | 0.230           | 0.198        | 0.293        | <b>0.254</b> | 0.529        | 0.269        | 0.387        |
| <b>Correlation</b> |                      |                 |              |              |              |              |              |              |
| ARGOX              | <b>0.951</b>         | <b>0.957</b>    | 0.957        | <b>0.944</b> | 0.861        | <b>0.927</b> | <b>0.925</b> | <b>0.867</b> |
| VAR                | 0.835                | 0.923           | <b>0.963</b> | 0.921        | 0.555        | 0.788        | 0.812        | 0.699        |
| GFT                | –                    | –               | 0.934        | –            | –            | –            | –            | –            |
| Lu et al. (2019)   | –                    | 0.949           | 0.960        | 0.930        | <b>0.896</b> | –            | –            | –            |
| naive              | 0.941                | 0.956           | 0.949        | 0.939        | 0.865        | 0.886        | 0.901        | 0.810        |

**Table S7.** Comparison of different methods for state-level %ILI estimation in Arizona (AZ). The MSE, MAE, and correlation are reported. The method with the best performance is highlighted in boldface for each metric in each period.

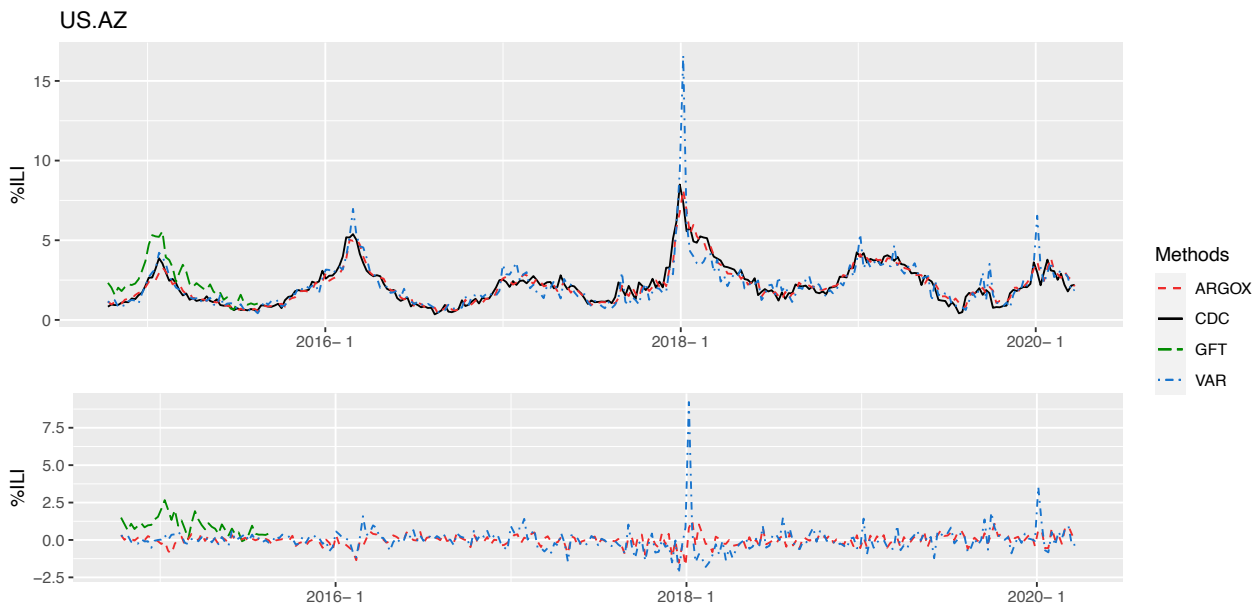

**Figure S3.** Plots of the %ILI estimates (top) and the estimation errors (bottom) for Arizona (AZ).

|                    | Whole period '14-'20 | Overall '14-'17 | '14-'15      | '15-'16      | '16-'17      | '17-'18      | '18-'19      | '19-'20      |
|--------------------|----------------------|-----------------|--------------|--------------|--------------|--------------|--------------|--------------|
| <b>MSE</b>         |                      |                 |              |              |              |              |              |              |
| ARGOX              | <b>0.786</b>         | <b>0.585</b>    | <b>1.024</b> | <b>0.286</b> | <b>0.677</b> | <b>0.849</b> | <b>0.551</b> | <b>3.791</b> |
| VAR                | 2.487                | 1.529           | 2.202        | 0.879        | 2.109        | 9.018        | 2.619        | 3.827        |
| GFT                | –                    | –               | 1.820        | –            | –            | –            | –            | –            |
| Lu et al. (2019)   | –                    | 0.679           | 1.325        | 0.341        | –            | –            | –            | –            |
| naive              | 1.201                | 0.922           | 1.570        | 0.418        | 1.166        | 2.024        | 0.974        | 4.553        |
| <b>MAE</b>         |                      |                 |              |              |              |              |              |              |
| ARGOX              | <b>0.532</b>         | <b>0.457</b>    | <b>0.586</b> | <b>0.389</b> | <b>0.549</b> | <b>0.673</b> | <b>0.550</b> | 1.424        |
| VAR                | 0.894                | 0.806           | 0.964        | 0.686        | 1.075        | 1.584        | 1.125        | <b>1.275</b> |
| GFT                | –                    | –               | 1.153        | –            | –            | –            | –            | –            |
| Lu et al. (2019)   | –                    | –               | –            | –            | –            | –            | –            | –            |
| naive              | 0.647                | 0.548           | 0.677        | 0.472        | 0.708        | 1.016        | 0.729        | 1.523        |
| <b>Correlation</b> |                      |                 |              |              |              |              |              |              |
| ARGOX              | <b>0.937</b>         | <b>0.940</b>    | 0.927        | <b>0.904</b> | <b>0.940</b> | <b>0.972</b> | <b>0.951</b> | <b>0.667</b> |
| VAR                | 0.856                | 0.860           | 0.907        | 0.685        | 0.783        | 0.842        | 0.884        | 0.633        |
| GFT                | –                    | –               | <b>0.974</b> | –            | –            | –            | –            | –            |
| Lu et al. (2019)   | –                    | 0.928           | 0.909        | 0.875        | –            | –            | –            | –            |
| naive              | 0.906                | 0.906           | 0.889        | 0.866        | 0.893        | 0.920        | 0.903        | 0.620        |

**Table S8.** Comparison of different methods for state-level %ILI estimation in Arkansas (AR). The MSE, MAE, and correlation are reported. The method with the best performance is highlighted in boldface for each metric in each period.

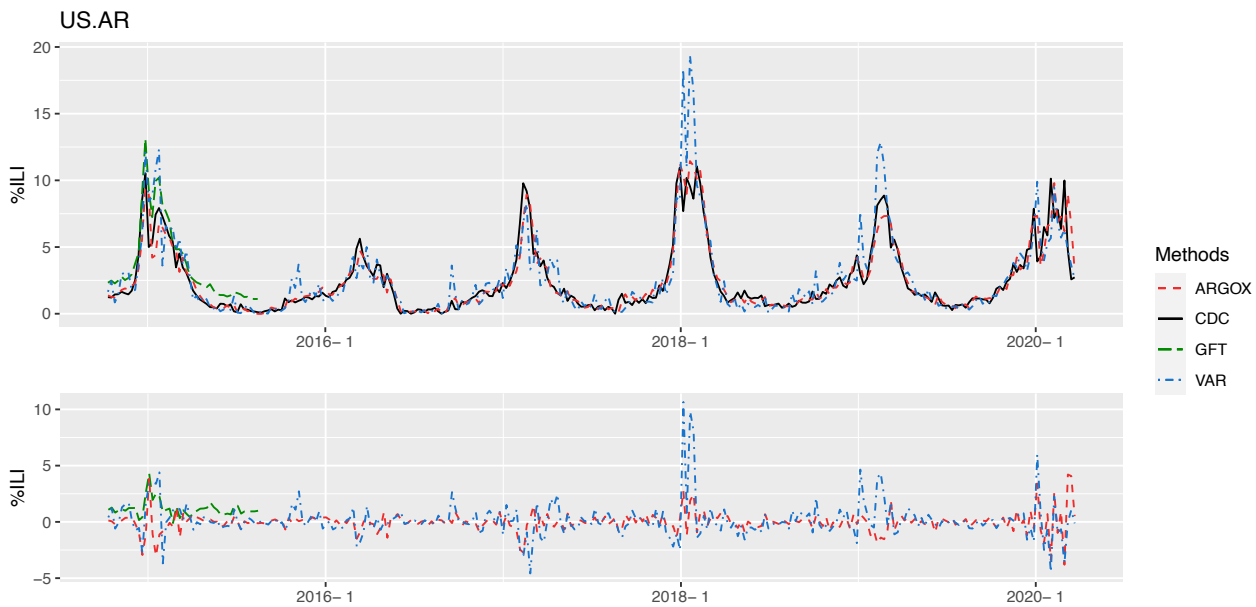

**Figure S4.** Plots of the %ILI estimates (top) and the estimation errors (bottom) for Arkansas (AR).



|                    | Whole period '14-'20 | Overall '14-'17 | '14-'15      | '15-'16      | '16-'17      | '17-'18      | '18-'19      | '19-'20      |
|--------------------|----------------------|-----------------|--------------|--------------|--------------|--------------|--------------|--------------|
| <b>MSE</b>         |                      |                 |              |              |              |              |              |              |
| ARGOX              | <b>0.076</b>         | <b>0.067</b>    | <b>0.081</b> | <b>0.078</b> | 0.068        | <b>0.155</b> | <b>0.047</b> | <b>0.195</b> |
| VAR                | 0.169                | 0.162           | 0.172        | 0.190        | 0.190        | 0.409        | 0.093        | 0.257        |
| GFT                | –                    | –               | 0.266        | –            | –            | –            | –            | –            |
| Lu et al. (2019)   | –                    | –               | –            | –            | –            | –            | –            | –            |
| naive              | 0.123                | 0.092           | 0.124        | 0.125        | <b>0.064</b> | 0.398        | 0.069        | 0.222        |
| <b>MAE</b>         |                      |                 |              |              |              |              |              |              |
| ARGOX              | <b>0.187</b>         | <b>0.186</b>    | <b>0.199</b> | <b>0.218</b> | <b>0.192</b> | <b>0.250</b> | <b>0.172</b> | <b>0.314</b> |
| VAR                | 0.288                | 0.284           | 0.272        | 0.320        | 0.310        | 0.457        | 0.255        | 0.379        |
| GFT                | –                    | –               | 0.388        | –            | –            | –            | –            | –            |
| Lu et al. (2019)   | –                    | –               | –            | –            | –            | –            | –            | –            |
| naive              | 0.224                | 0.214           | 0.233        | 0.277        | 0.194        | 0.381        | 0.220        | 0.330        |
| <b>Correlation</b> |                      |                 |              |              |              |              |              |              |
| ARGOX              | <b>0.971</b>         | <b>0.962</b>    | <b>0.966</b> | <b>0.940</b> | <b>0.926</b> | <b>0.958</b> | <b>0.958</b> | <b>0.950</b> |
| VAR                | 0.941                | 0.938           | 0.949        | 0.908        | 0.872        | 0.926        | 0.924        | 0.931        |
| GFT                | –                    | –               | 0.927        | –            | –            | –            | –            | –            |
| Lu et al. (2019)   | –                    | –               | –            | –            | –            | –            | –            | –            |
| naive              | 0.952                | 0.947           | 0.944        | 0.907        | 0.917        | 0.892        | 0.940        | 0.943        |

**Table S9.** Comparison of different methods for state-level %ILI estimation in California (CA). The MSE, MAE, and correlation are reported. The method with the best performance is highlighted in boldface for each metric in each period.

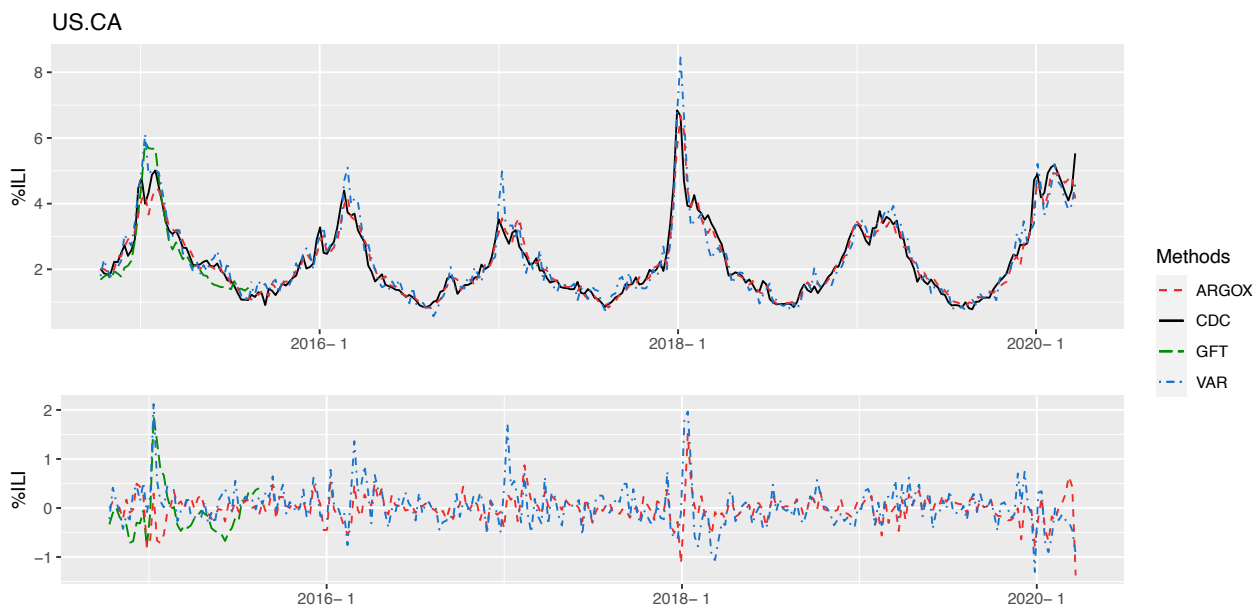

**Figure S5.** Plots of the %ILI estimates (top) and the estimation errors (bottom) for California (CA).

|                    | Whole period '14-'20 | Overall '14-'17 | '14-'15      | '15-'16      | '16-'17      | '17-'18      | '18-'19      | '19-'20      |
|--------------------|----------------------|-----------------|--------------|--------------|--------------|--------------|--------------|--------------|
| <b>MSE</b>         |                      |                 |              |              |              |              |              |              |
| ARGOX              | <b>0.178</b>         | <b>0.153</b>    | <b>0.166</b> | <b>0.028</b> | <b>0.343</b> | <b>0.047</b> | 0.624        | <b>0.196</b> |
| VAR                | 0.770                | 0.456           | 0.514        | 0.070        | 1.042        | 0.814        | 1.971        | 2.211        |
| GFT                | –                    | –               | 0.585        | –            | –            | –            | –            | –            |
| Lu et al. (2019)   | –                    | –               | –            | –            | –            | –            | –            | –            |
| naive              | 0.225                | 0.201           | 0.204        | 0.043        | 0.470        | 0.071        | <b>0.525</b> | 0.533        |
| <b>MAE</b>         |                      |                 |              |              |              |              |              |              |
| ARGOX              | <b>0.272</b>         | <b>0.241</b>    | <b>0.236</b> | <b>0.119</b> | <b>0.430</b> | <b>0.161</b> | 0.635        | <b>0.332</b> |
| VAR                | 0.531                | 0.374           | 0.363        | 0.204        | 0.676        | 0.578        | 1.062        | 1.085        |
| GFT                | –                    | –               | 0.420        | –            | –            | –            | –            | –            |
| Lu et al. (2019)   | –                    | –               | –            | –            | –            | –            | –            | –            |
| naive              | 0.310                | 0.287           | 0.279        | 0.166        | 0.506        | 0.213        | <b>0.562</b> | 0.534        |
| <b>Correlation</b> |                      |                 |              |              |              |              |              |              |
| ARGOX              | <b>0.972</b>         | <b>0.864</b>    | <b>0.927</b> | <b>0.926</b> | <b>0.484</b> | <b>0.979</b> | <b>0.910</b> | <b>0.975</b> |
| VAR                | 0.888                | 0.665           | 0.754        | 0.824        | 0.461        | 0.811        | 0.661        | 0.784        |
| GFT                | –                    | –               | 0.850        | –            | –            | –            | –            | –            |
| Lu et al. (2019)   | –                    | –               | –            | –            | –            | –            | –            | –            |
| naive              | 0.964                | 0.832           | 0.908        | 0.885        | 0.374        | 0.961        | 0.904        | 0.930        |

**Table S10.** Comparison of different methods for state-level %ILI estimation in Colorado (CO). The MSE, MAE, and correlation are reported. The method with the best performance is highlighted in boldface for each metric in each period.

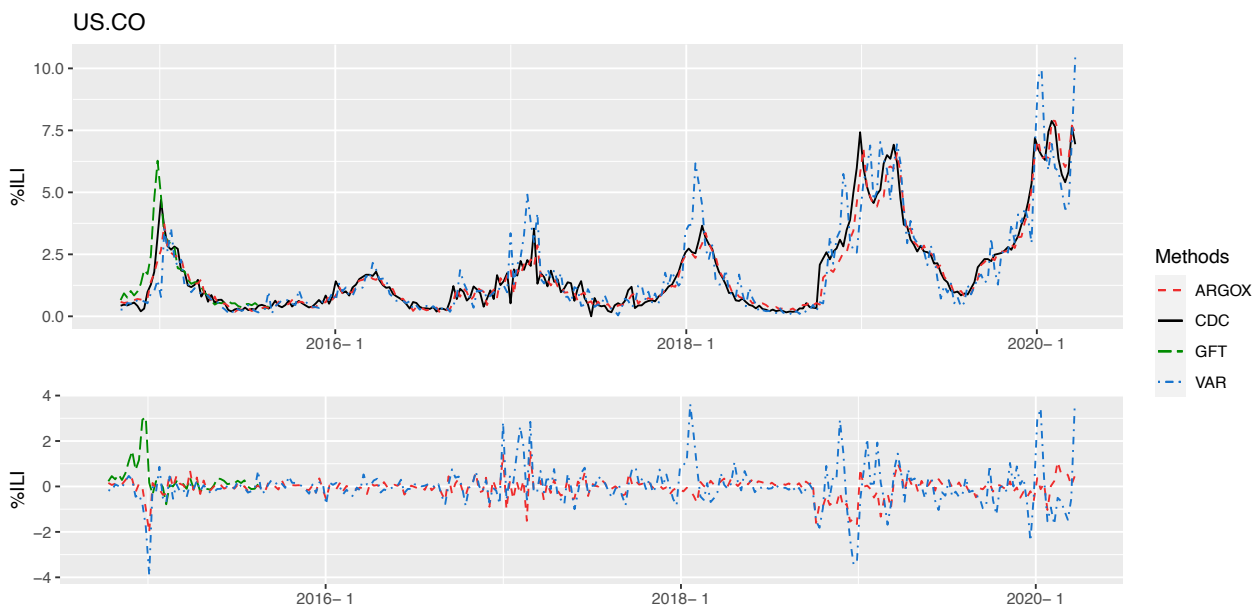

**Figure S6.** Plots of the %ILI estimates (top) and the estimation errors (bottom) for Colorado (CO).

|                    | Whole period '14-'20 | Overall '14-'17 | '14-'15      | '15-'16      | '16-'17      | '17-'18      | '18-'19      | '19-'20      |
|--------------------|----------------------|-----------------|--------------|--------------|--------------|--------------|--------------|--------------|
| <b>MSE</b>         |                      |                 |              |              |              |              |              |              |
| ARGOX              | <b>0.281</b>         | <b>0.228</b>    | 0.411        | 0.222        | <b>0.145</b> | <b>0.283</b> | <b>0.175</b> | <b>0.462</b> |
| VAR                | 3.626                | 5.482           | 15.079       | 1.046        | 0.512        | 3.095        | 1.515        | 3.967        |
| GFT                | –                    | –               | 1.944        | –            | –            | –            | –            | –            |
| Lu et al. (2019)   | –                    | –               | –            | –            | –            | –            | –            | –            |
| naive              | 0.330                | 0.230           | <b>0.349</b> | <b>0.213</b> | 0.242        | 0.399        | 0.243        | 0.636        |
| <b>MAE</b>         |                      |                 |              |              |              |              |              |              |
| ARGOX              | <b>0.359</b>         | 0.314           | 0.410        | 0.365        | <b>0.300</b> | <b>0.388</b> | <b>0.324</b> | <b>0.439</b> |
| VAR                | 0.891                | 0.925           | 1.584        | 0.845        | 0.584        | 1.090        | 0.910        | 1.395        |
| GFT                | –                    | –               | 0.999        | –            | –            | –            | –            | –            |
| Lu et al. (2019)   | –                    | –               | –            | –            | –            | –            | –            | –            |
| naive              | 0.375                | <b>0.305</b>    | <b>0.323</b> | <b>0.360</b> | 0.379        | 0.458        | 0.367        | 0.578        |
| <b>Correlation</b> |                      |                 |              |              |              |              |              |              |
| ARGOX              | <b>0.962</b>         | 0.942           | 0.918        | 0.882        | <b>0.955</b> | <b>0.956</b> | <b>0.953</b> | <b>0.976</b> |
| VAR                | 0.699                | 0.443           | 0.222        | 0.674        | 0.855        | 0.785        | 0.767        | 0.822        |
| GFT                | –                    | –               | 0.774        | –            | –            | –            | –            | –            |
| Lu et al. (2019)   | –                    | –               | –            | –            | –            | –            | –            | –            |
| naive              | 0.955                | <b>0.942</b>    | <b>0.928</b> | <b>0.887</b> | 0.925        | 0.938        | 0.934        | 0.960        |

**Table S11.** Comparison of different methods for state-level %ILI estimation in Connecticut (CT). The MSE, MAE, and correlation are reported. The method with the best performance is highlighted in boldface for each metric in each period.

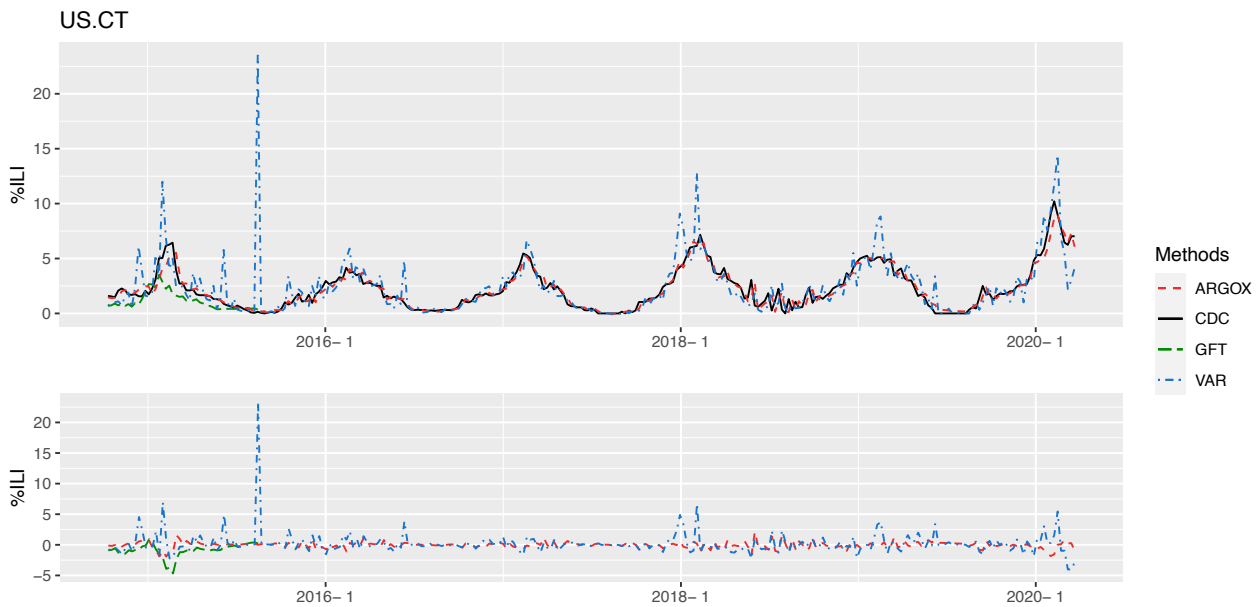

**Figure S7.** Plots of the %ILI estimates (top) and the estimation errors (bottom) for Connecticut (CT).

|                    | Whole period '14-'20 | Overall '14-'17 | '14-'15      | '15-'16      | '16-'17      | '17-'18      | '18-'19      | '19-'20      |
|--------------------|----------------------|-----------------|--------------|--------------|--------------|--------------|--------------|--------------|
| <b>MSE</b>         |                      |                 |              |              |              |              |              |              |
| ARGOX              | <b>0.187</b>         | 0.126           | 0.297        | <b>0.062</b> | <b>0.041</b> | <b>0.445</b> | <b>0.071</b> | <b>0.725</b> |
| VAR                | 0.644                | 0.313           | 0.495        | 0.116        | 0.486        | 2.306        | 0.239        | 2.213        |
| GFT                | –                    | –               | 3.978        | –            | –            | –            | –            | –            |
| Lu et al. (2019)   | –                    | 0.163           | 0.377        | 0.073        | 0.053        | –            | –            | –            |
| naive              | 0.211                | <b>0.107</b>    | <b>0.231</b> | 0.066        | 0.053        | 0.598        | 0.086        | 0.881        |
| <b>MAE</b>         |                      |                 |              |              |              |              |              |              |
| ARGOX              | <b>0.224</b>         | 0.189           | 0.266        | 0.188        | <b>0.156</b> | <b>0.340</b> | 0.209        | <b>0.600</b> |
| VAR                | 0.359                | 0.277           | 0.333        | 0.230        | 0.388        | 0.673        | 0.340        | 0.994        |
| GFT                | –                    | –               | 1.783        | –            | –            | –            | –            | –            |
| Lu et al. (2019)   | –                    | –               | –            | –            | –            | –            | –            | –            |
| naive              | 0.232                | <b>0.169</b>    | <b>0.217</b> | <b>0.173</b> | 0.173        | 0.455        | <b>0.208</b> | 0.674        |
| <b>Correlation</b> |                      |                 |              |              |              |              |              |              |
| ARGOX              | <b>0.874</b>         | 0.824           | 0.813        | 0.832        | <b>0.769</b> | <b>0.889</b> | <b>0.899</b> | <b>0.781</b> |
| VAR                | 0.748                | 0.718           | 0.760        | 0.659        | 0.730        | 0.848        | 0.779        | 0.457        |
| GFT                | –                    | –               | 0.747        | –            | –            | –            | –            | –            |
| Lu et al. (2019)   | –                    | 0.843           | 0.841        | <b>0.840</b> | 0.614        | –            | –            | –            |
| naive              | 0.864                | <b>0.860</b>    | <b>0.864</b> | 0.832        | 0.739        | 0.850        | 0.882        | 0.748        |

**Table S12.** Comparison of different methods for state-level %ILI estimation in Delaware (DE). The MSE, MAE, and correlation are reported. The method with the best performance is highlighted in boldface for each metric in each period.

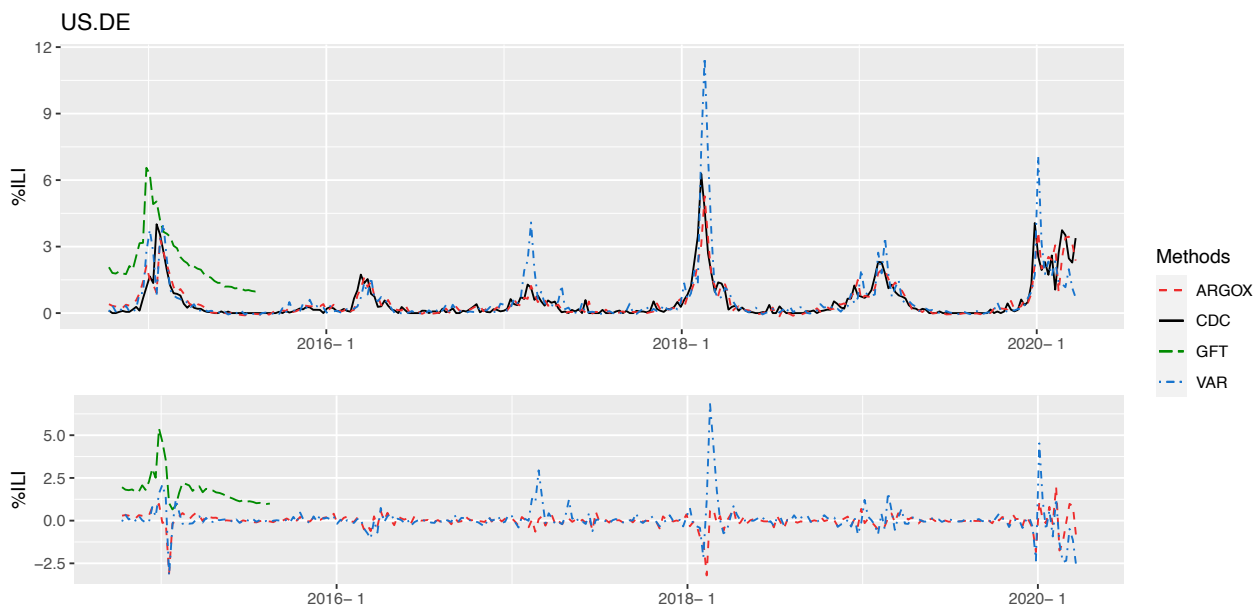

**Figure S8.** Plots of the %ILI estimates (top) and the estimation errors (bottom) for Delaware (DE).

|                    | Whole period '14-'20 | Overall '14-'17 | '14-'15      | '15-'16      | '16-'17      | '17-'18      | '18-'19      | '19-'20      |
|--------------------|----------------------|-----------------|--------------|--------------|--------------|--------------|--------------|--------------|
| <b>MSE</b>         |                      |                 |              |              |              |              |              |              |
| ARGOX              | <b>2.011</b>         | <b>2.806</b>    | <b>2.875</b> | <b>2.634</b> | <b>4.192</b> | 1.531        | <b>0.216</b> | <b>0.516</b> |
| VAR                | 15.898               | 10.397          | 5.739        | 15.635       | 17.804       | 14.672       | 7.150        | 1.439        |
| GFT                | –                    | –               | 25.894       | –            | –            | –            | –            | –            |
| Lu et al. (2019)   | –                    | –               | –            | –            | –            | –            | –            | –            |
| naïve              | 2.081                | 2.907           | 3.124        | 2.787        | 4.811        | <b>0.695</b> | 0.280        | 0.689        |
| <b>MAE</b>         |                      |                 |              |              |              |              |              |              |
| ARGOX              | 0.968                | 1.227           | <b>1.195</b> | 1.289        | <b>1.418</b> | 1.012        | <b>0.320</b> | <b>0.568</b> |
| VAR                | 2.126                | 2.249           | 1.741        | 2.723        | 3.370        | 2.132        | 1.775        | 0.921        |
| GFT                | –                    | –               | 4.759        | –            | –            | –            | –            | –            |
| Lu et al. (2019)   | –                    | –               | –            | –            | –            | –            | –            | –            |
| naïve              | <b>0.888</b>         | <b>1.194</b>    | 1.297        | <b>1.277</b> | 1.509        | <b>0.444</b> | 0.342        | 0.650        |
| <b>Correlation</b> |                      |                 |              |              |              |              |              |              |
| ARGOX              | 0.873                | 0.820           | <b>0.828</b> | 0.786        | <b>0.609</b> | 0.666        | <b>0.677</b> | <b>0.794</b> |
| VAR                | 0.554                | 0.605           | 0.602        | 0.580        | 0.475        | 0.602        | 0.243        | 0.656        |
| GFT                | –                    | –               | 0.728        | –            | –            | –            | –            | –            |
| Lu et al. (2019)   | –                    | –               | –            | –            | –            | –            | –            | –            |
| naïve              | <b>0.873</b>         | <b>0.828</b>    | 0.810        | <b>0.810</b> | 0.562        | <b>0.728</b> | 0.605        | 0.741        |

**Table S13.** Comparison of different methods for state-level %ILI estimation in District of Columbia (DC). The MSE, MAE, and correlation are reported. The method with the best performance is highlighted in boldface for each metric in each period.

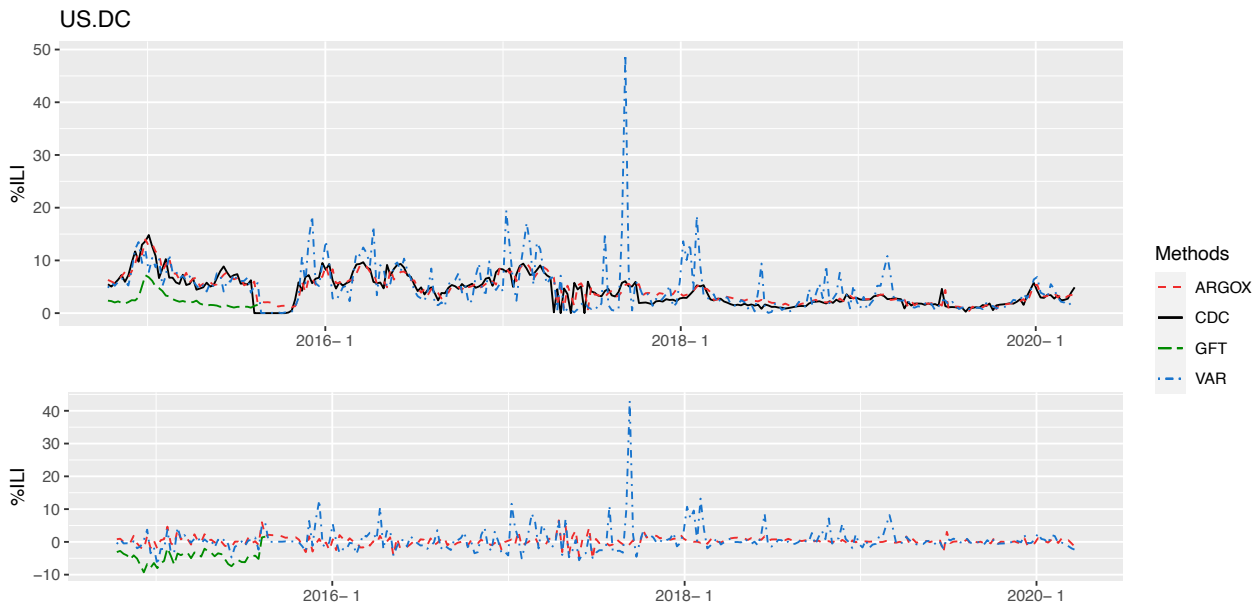

**Figure S9.** Plots of the %ILI estimates (top) and the estimation errors (bottom) for District of Columbia (DC).

|                    | Whole period '14-'20 | Overall '14-'17 | '14-'15      | '15-'16      | '16-'17      | '17-'18      | '18-'19      | '19-'20      |
|--------------------|----------------------|-----------------|--------------|--------------|--------------|--------------|--------------|--------------|
| <b>MSE</b>         |                      |                 |              |              |              |              |              |              |
| ARGOX              | <b>0.346</b>         | <b>0.282</b>    | 0.606        | <b>0.096</b> | <b>0.192</b> | <b>1.057</b> | <b>0.145</b> | <b>0.742</b> |
| VAR                | 0.715                | 0.416           | 0.493        | 0.469        | 0.445        | 1.595        | 0.986        | 2.239        |
| GFT                | –                    | –               | 0.600        | –            | –            | –            | –            | –            |
| Lu et al. (2019)   | –                    | 0.283           | <b>0.408</b> | 0.224        | 0.347        | –            | –            | –            |
| naïve              | 0.688                | 0.410           | 0.888        | 0.129        | 0.318        | 2.188        | 0.452        | 2.045        |
| <b>MAE</b>         |                      |                 |              |              |              |              |              |              |
| ARGOX              | <b>0.337</b>         | <b>0.313</b>    | <b>0.378</b> | <b>0.242</b> | <b>0.373</b> | <b>0.617</b> | <b>0.271</b> | <b>0.658</b> |
| VAR                | 0.527                | 0.454           | 0.451        | 0.484        | 0.518        | 0.834        | 0.666        | 0.954        |
| GFT                | –                    | –               | 0.470        | –            | –            | –            | –            | –            |
| Lu et al. (2019)   | –                    | –               | –            | –            | –            | –            | –            | –            |
| naïve              | 0.442                | 0.347           | 0.442        | 0.275        | 0.418        | 0.837        | 0.488        | 1.085        |
| <b>Correlation</b> |                      |                 |              |              |              |              |              |              |
| ARGOX              | <b>0.970</b>         | 0.928           | 0.882        | <b>0.877</b> | <b>0.945</b> | <b>0.968</b> | <b>0.966</b> | <b>0.936</b> |
| VAR                | 0.943                | 0.889           | 0.908        | 0.352        | 0.870        | 0.956        | 0.846        | 0.869        |
| GFT                | –                    | –               | 0.901        | –            | –            | –            | –            | –            |
| Lu et al. (2019)   | –                    | <b>0.945</b>    | <b>0.957</b> | 0.711        | 0.936        | –            | –            | –            |
| naïve              | 0.941                | 0.893           | 0.827        | 0.837        | 0.909        | 0.934        | 0.878        | 0.830        |

**Table S14.** Comparison of different methods for state-level %ILI estimation in Georgia (GA). The MSE, MAE, and correlation are reported. The method with the best performance is highlighted in boldface for each metric in each period.

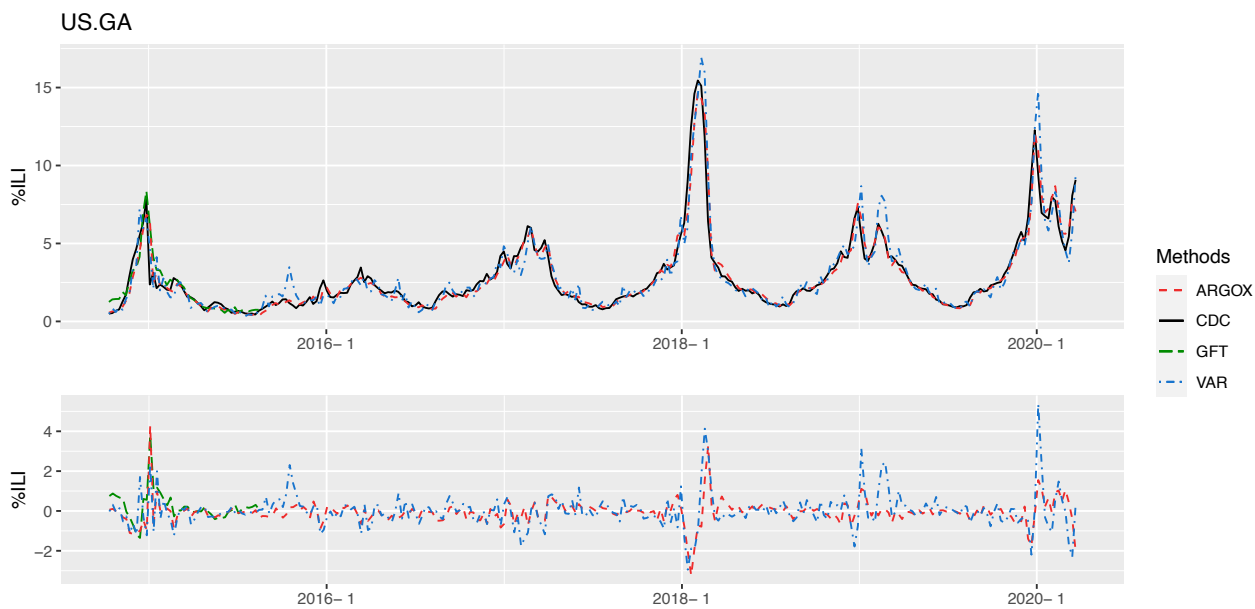

**Figure S10.** Plots of the %ILI estimates (top) and the estimation errors (bottom) for Georgia (GA).

|                    | Whole period '14-'20 | Overall '14-'17 | '14-'15      | '15-'16      | '16-'17      | '17-'18      | '18-'19      | '19-'20      |
|--------------------|----------------------|-----------------|--------------|--------------|--------------|--------------|--------------|--------------|
| <b>MSE</b>         |                      |                 |              |              |              |              |              |              |
| ARGOX              | <b>0.821</b>         | 1.133           | 2.491        | <b>0.593</b> | <b>0.463</b> | <b>1.279</b> | <b>0.381</b> | <b>0.468</b> |
| VAR                | 2.395                | 2.945           | 7.087        | 1.148        | 0.893        | 4.532        | 0.409        | 3.337        |
| GFT                | –                    | –               | 15.289       | –            | –            | –            | –            | –            |
| Lu et al. (2019)   | –                    | –               | –            | –            | –            | –            | –            | –            |
| naïve              | 0.880                | <b>1.099</b>    | <b>2.305</b> | 0.619        | 0.548        | 1.574        | 0.500        | 0.590        |
| <b>MAE</b>         |                      |                 |              |              |              |              |              |              |
| ARGOX              | <b>0.618</b>         | <b>0.707</b>    | 1.059        | <b>0.619</b> | <b>0.558</b> | <b>0.832</b> | <b>0.469</b> | <b>0.528</b> |
| VAR                | 0.989                | 1.093           | 1.805        | 0.813        | 0.765        | 1.354        | 0.513        | 1.420        |
| GFT                | –                    | –               | 3.292        | –            | –            | –            | –            | –            |
| Lu et al. (2019)   | –                    | –               | –            | –            | –            | –            | –            | –            |
| naïve              | 0.662                | 0.717           | <b>1.037</b> | 0.642        | 0.609        | 0.966        | 0.510        | 0.608        |
| <b>Correlation</b> |                      |                 |              |              |              |              |              |              |
| ARGOX              | <b>0.935</b>         | 0.943           | 0.929        | <b>0.906</b> | <b>0.747</b> | <b>0.780</b> | <b>0.868</b> | <b>0.894</b> |
| VAR                | 0.871                | 0.891           | 0.870        | 0.832        | 0.632        | 0.681        | 0.854        | 0.720        |
| GFT                | –                    | –               | 0.899        | –            | –            | –            | –            | –            |
| Lu et al. (2019)   | –                    | –               | –            | –            | –            | –            | –            | –            |
| naïve              | 0.933                | <b>0.946</b>    | <b>0.936</b> | 0.905        | 0.716        | 0.730        | 0.833        | 0.874        |

**Table S15.** Comparison of different methods for state-level %ILI estimation in Hawaii (HI). The MSE, MAE, and correlation are reported. The method with the best performance is highlighted in boldface for each metric in each period.

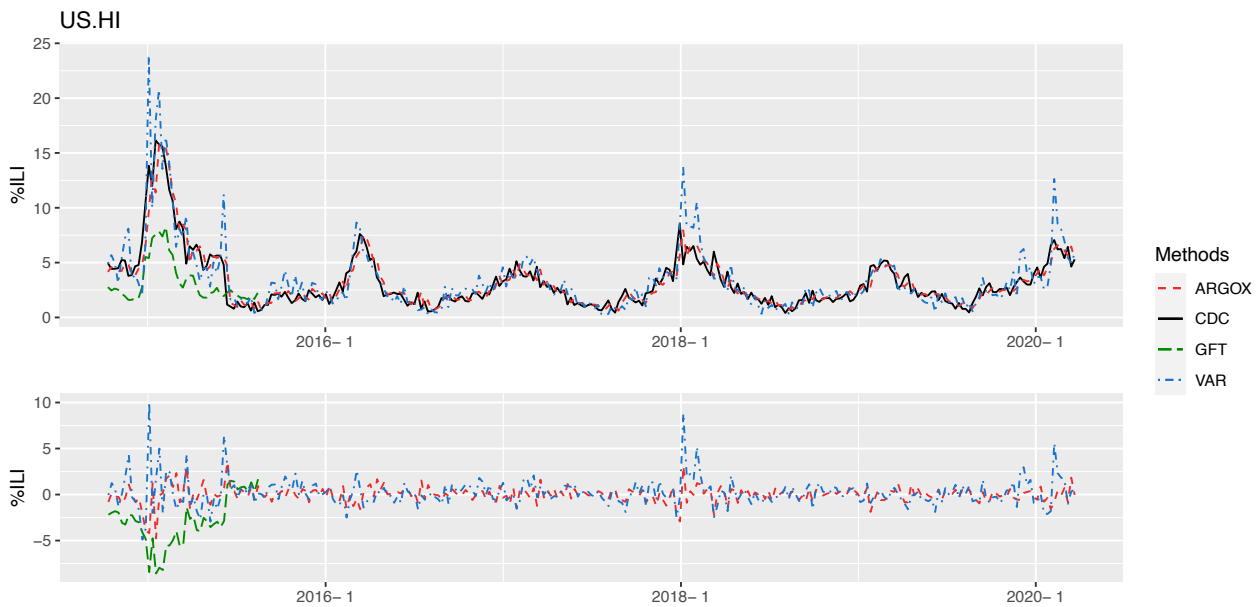

**Figure S11.** Plots of the %ILI estimates (top) and the estimation errors (bottom) for Hawaii (HI).

|                    | Whole period '14-'20 | Overall '14-'17 | '14-'15      | '15-'16      | '16-'17      | '17-'18      | '18-'19      | '19-'20      |
|--------------------|----------------------|-----------------|--------------|--------------|--------------|--------------|--------------|--------------|
| <b>MSE</b>         |                      |                 |              |              |              |              |              |              |
| ARGOX              | <b>0.252</b>         | <b>0.283</b>    | <b>0.433</b> | 0.250        | <b>0.164</b> | <b>0.255</b> | 0.552        | 0.186        |
| VAR                | 1.008                | 1.605           | 2.637        | 0.525        | 0.777        | 1.020        | <b>0.539</b> | 0.541        |
| GFT                | –                    | –               | 1.395        | –            | –            | –            | –            | –            |
| Lu et al. (2019)   | –                    | 0.377           | 0.494        | <b>0.205</b> | –            | –            | –            | –            |
| naive              | 0.322                | 0.369           | 0.675        | 0.221        | 0.228        | 0.398        | 0.673        | <b>0.164</b> |
| <b>MAE</b>         |                      |                 |              |              |              |              |              |              |
| ARGOX              | <b>0.351</b>         | <b>0.402</b>    | <b>0.473</b> | 0.397        | <b>0.316</b> | <b>0.379</b> | 0.512        | 0.335        |
| VAR                | 0.605                | 0.809           | 1.073        | 0.578        | 0.702        | 0.728        | <b>0.501</b> | 0.557        |
| GFT                | –                    | –               | 0.965        | –            | –            | –            | –            | –            |
| Lu et al. (2019)   | –                    | –               | –            | –            | –            | –            | –            | –            |
| naive              | 0.383                | 0.452           | 0.629        | <b>0.375</b> | 0.362        | 0.469        | 0.583        | <b>0.333</b> |
| <b>Correlation</b> |                      |                 |              |              |              |              |              |              |
| ARGOX              | <b>0.919</b>         | 0.928           | 0.939        | 0.621        | <b>0.803</b> | <b>0.874</b> | 0.778        | <b>0.874</b> |
| VAR                | 0.744                | 0.687           | 0.732        | 0.383        | 0.274        | 0.816        | <b>0.818</b> | 0.494        |
| GFT                | –                    | –               | <b>0.952</b> | –            | –            | –            | –            | –            |
| Lu et al. (2019)   | –                    | <b>0.929</b>    | 0.931        | <b>0.697</b> | –            | –            | –            | –            |
| naive              | 0.900                | 0.909           | 0.904        | 0.692        | 0.750        | 0.818        | 0.754        | 0.863        |

**Table S16.** Comparison of different methods for state-level %ILI estimation in Idaho (ID). The MSE, MAE, and correlation are reported. The method with the best performance is highlighted in boldface for each metric in each period.

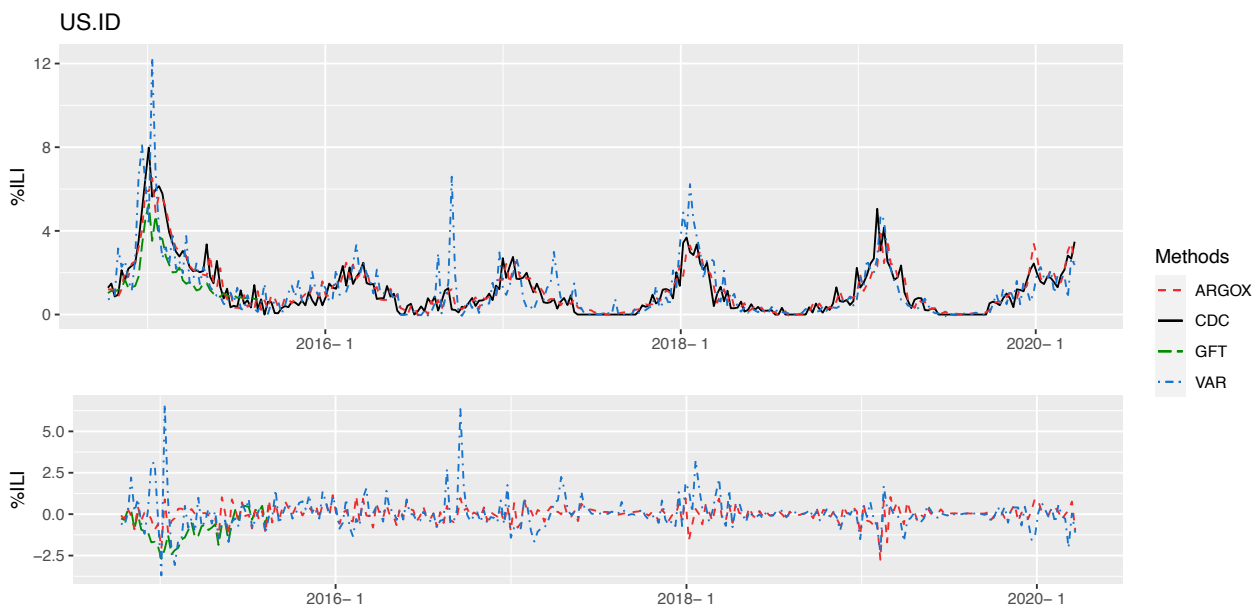

**Figure S12.** Plots of the %ILI estimates (top) and the estimation errors (bottom) for Idaho (ID).



|                    | Whole period '14-'20 | Overall '14-'17 | '14-'15      | '15-'16      | '16-'17      | '17-'18      | '18-'19      | '19-'20      |
|--------------------|----------------------|-----------------|--------------|--------------|--------------|--------------|--------------|--------------|
| <b>MSE</b>         |                      |                 |              |              |              |              |              |              |
| ARGOX              | <b>0.085</b>         | <b>0.079</b>    | <b>0.156</b> | <b>0.050</b> | <b>0.046</b> | <b>0.106</b> | <b>0.077</b> | <b>0.291</b> |
| VAR                | 0.203                | 0.157           | 0.259        | 0.068        | 0.146        | 0.327        | 0.122        | 0.829        |
| GFT                | –                    | –               | 0.414        | –            | –            | –            | –            | –            |
| Lu et al. (2019)   | –                    | –               | –            | –            | –            | –            | –            | –            |
| naive              | 0.163                | 0.117           | 0.188        | 0.073        | 0.129        | 0.381        | 0.155        | 0.479        |
| <b>MAE</b>         |                      |                 |              |              |              |              |              |              |
| ARGOX              | <b>0.185</b>         | <b>0.189</b>    | <b>0.247</b> | <b>0.179</b> | <b>0.177</b> | <b>0.213</b> | <b>0.194</b> | <b>0.387</b> |
| VAR                | 0.289                | 0.285           | 0.357        | 0.203        | 0.292        | 0.365        | 0.228        | 0.680        |
| GFT                | –                    | –               | 0.574        | –            | –            | –            | –            | –            |
| Lu et al. (2019)   | –                    | –               | –            | –            | –            | –            | –            | –            |
| naive              | 0.254                | 0.230           | 0.262        | 0.221        | 0.268        | 0.396        | 0.285        | 0.523        |
| <b>Correlation</b> |                      |                 |              |              |              |              |              |              |
| ARGOX              | <b>0.980</b>         | <b>0.967</b>    | <b>0.951</b> | <b>0.959</b> | <b>0.978</b> | <b>0.984</b> | <b>0.947</b> | <b>0.967</b> |
| VAR                | 0.952                | 0.941           | 0.933        | 0.956        | 0.931        | 0.955        | 0.913        | 0.905        |
| GFT                | –                    | –               | 0.947        | –            | –            | –            | –            | –            |
| Lu et al. (2019)   | –                    | –               | –            | –            | –            | –            | –            | –            |
| naive              | 0.962                | 0.951           | 0.939        | 0.939        | 0.936        | 0.939        | 0.889        | 0.945        |

**Table S17.** Comparison of different methods for state-level %ILI estimation in Illinois (IL). The MSE, MAE, and correlation are reported. The method with the best performance is highlighted in boldface for each metric in each period.

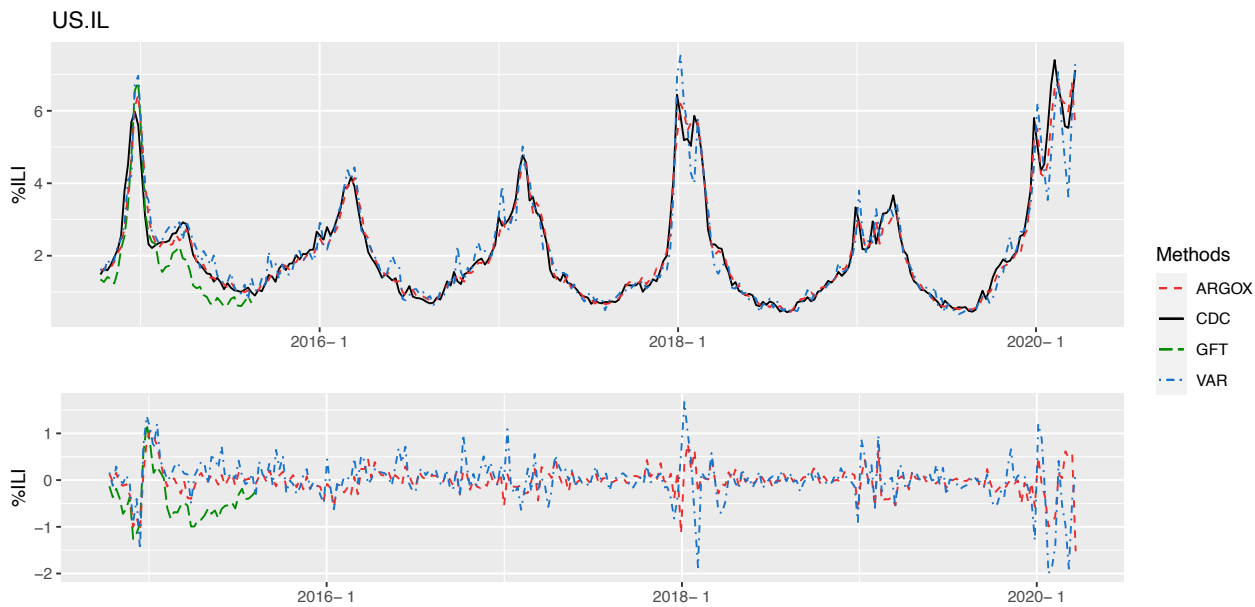

**Figure S13.** Plots of the %ILI estimates (top) and the estimation errors (bottom) for Illinois (IL).

|                    | Whole period '14-'20 | Overall '14-'17 | '14-'15      | '15-'16      | '16-'17      | '17-'18      | '18-'19      | '19-'20      |
|--------------------|----------------------|-----------------|--------------|--------------|--------------|--------------|--------------|--------------|
| <b>MSE</b>         |                      |                 |              |              |              |              |              |              |
| ARGOX              | <b>0.326</b>         | <b>0.304</b>    | 0.372        | <b>0.164</b> | <b>0.493</b> | <b>0.345</b> | <b>0.328</b> | <b>0.998</b> |
| VAR                | 1.266                | 0.761           | 1.410        | 0.463        | 0.682        | 3.456        | 1.959        | 2.641        |
| GFT                | –                    | –               | <b>0.220</b> | –            | –            | –            | –            | –            |
| Lu et al. (2019)   | –                    | –               | –            | –            | –            | –            | –            | –            |
| naive              | 0.537                | 0.515           | 0.751        | 0.315        | 0.689        | 0.928        | 0.613        | 1.094        |
| <b>MAE</b>         |                      |                 |              |              |              |              |              |              |
| ARGOX              | <b>0.372</b>         | <b>0.371</b>    | 0.382        | <b>0.310</b> | <b>0.485</b> | <b>0.435</b> | <b>0.408</b> | <b>0.576</b> |
| VAR                | 0.636                | 0.531           | 0.638        | 0.499        | 0.640        | 1.056        | 0.940        | 0.992        |
| GFT                | –                    | –               | <b>0.373</b> | –            | –            | –            | –            | –            |
| Lu et al. (2019)   | –                    | –               | –            | –            | –            | –            | –            | –            |
| naive              | 0.459                | 0.464           | 0.486        | 0.433        | 0.596        | 0.608        | 0.540        | 0.685        |
| <b>Correlation</b> |                      |                 |              |              |              |              |              |              |
| ARGOX              | <b>0.947</b>         | <b>0.925</b>    | 0.942        | <b>0.878</b> | <b>0.900</b> | <b>0.972</b> | <b>0.922</b> | <b>0.860</b> |
| VAR                | 0.857                | 0.869           | 0.907        | 0.707        | 0.857        | 0.884        | 0.668        | 0.609        |
| GFT                | –                    | –               | <b>0.970</b> | –            | –            | –            | –            | –            |
| Lu et al. (2019)   | –                    | –               | –            | –            | –            | –            | –            | –            |
| naive              | 0.914                | 0.877           | 0.885        | 0.776        | 0.865        | 0.925        | 0.857        | 0.840        |

**Table S18.** Comparison of different methods for state-level %ILI estimation in Indiana (IN). The MSE, MAE, and correlation are reported. The method with the best performance is highlighted in boldface for each metric in each period.

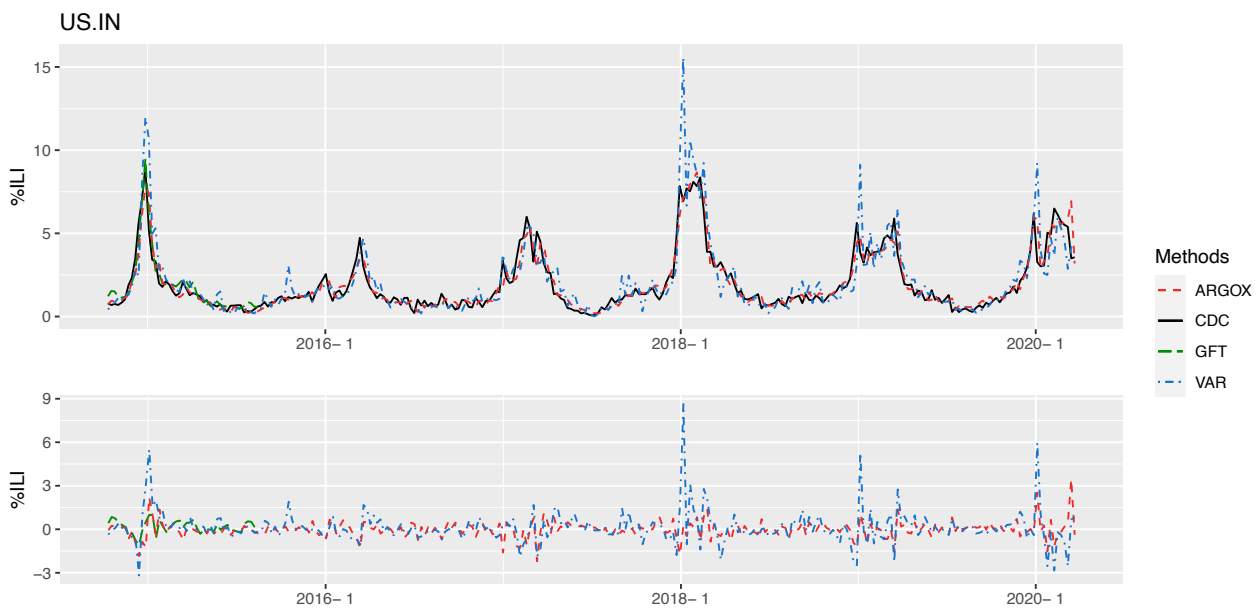

**Figure S14.** Plots of the %ILI estimates (top) and the estimation errors (bottom) for Indiana (IN).

|                    | Whole period '14-'20 | Overall '14-'17 | '14-'15      | '15-'16      | '16-'17      | '17-'18      | '18-'19      | '19-'20      |
|--------------------|----------------------|-----------------|--------------|--------------|--------------|--------------|--------------|--------------|
| <b>MSE</b>         |                      |                 |              |              |              |              |              |              |
| ARGOX              | <b>0.166</b>         | <b>0.182</b>    | 0.380        | <b>0.073</b> | <b>0.122</b> | <b>0.147</b> | <b>0.175</b> | <b>0.444</b> |
| VAR                | 0.446                | 0.201           | <b>0.318</b> | 0.096        | 0.256        | 0.888        | 0.430        | 2.245        |
| GFT                | –                    | –               | 4.702        | –            | –            | –            | –            | –            |
| Lu et al. (2019)   | –                    | –               | –            | –            | –            | –            | –            | –            |
| naïve              | 0.219                | 0.196           | 0.371        | 0.087        | 0.181        | 0.298        | 0.229        | 0.706        |
| <b>MAE</b>         |                      |                 |              |              |              |              |              |              |
| ARGOX              | <b>0.241</b>         | <b>0.243</b>    | 0.311        | <b>0.225</b> | <b>0.250</b> | <b>0.280</b> | <b>0.288</b> | <b>0.442</b> |
| VAR                | 0.350                | 0.279           | 0.301        | 0.249        | 0.381        | 0.516        | 0.450        | 0.933        |
| GFT                | –                    | –               | 1.237        | –            | –            | –            | –            | –            |
| Lu et al. (2019)   | –                    | –               | –            | –            | –            | –            | –            | –            |
| naïve              | 0.265                | 0.250           | <b>0.284</b> | 0.244        | 0.302        | 0.360        | 0.347        | 0.513        |
| <b>Correlation</b> |                      |                 |              |              |              |              |              |              |
| ARGOX              | <b>0.920</b>         | <b>0.816</b>    | 0.708        | <b>0.720</b> | <b>0.916</b> | <b>0.945</b> | <b>0.920</b> | <b>0.880</b> |
| VAR                | 0.825                | 0.787           | <b>0.775</b> | 0.677        | 0.809        | 0.815        | 0.867        | 0.563        |
| GFT                | –                    | –               | 0.605        | –            | –            | –            | –            | –            |
| Lu et al. (2019)   | –                    | –               | –            | –            | –            | –            | –            | –            |
| naïve              | 0.896                | 0.812           | 0.745        | 0.702        | 0.875        | 0.881        | 0.895        | 0.811        |

**Table S19.** Comparison of different methods for state-level %ILI estimation in Iowa (IA). The MSE, MAE, and correlation are reported. The method with the best performance is highlighted in boldface for each metric in each period.

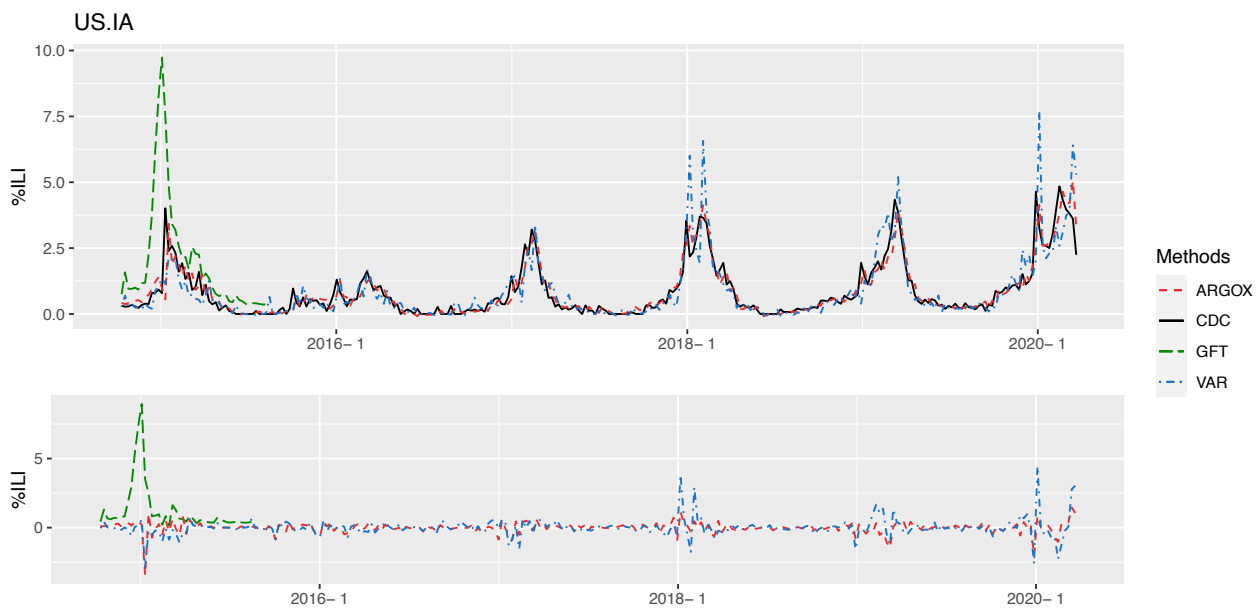

**Figure S15.** Plots of the %ILI estimates (top) and the estimation errors (bottom) for Iowa (IA).

|                    | Whole period '14-'20 | Overall '14-'17 | '14-'15      | '15-'16      | '16-'17      | '17-'18      | '18-'19      | '19-'20      |
|--------------------|----------------------|-----------------|--------------|--------------|--------------|--------------|--------------|--------------|
| <b>MSE</b>         |                      |                 |              |              |              |              |              |              |
| ARGOX              | <b>0.269</b>         | <b>0.326</b>    | <b>0.450</b> | <b>0.069</b> | 0.640        | <b>0.260</b> | <b>0.230</b> | <b>0.463</b> |
| VAR                | 1.489                | 0.909           | 1.504        | 0.616        | 1.045        | 2.389        | 0.866        | 7.667        |
| GFT                | –                    | –               | 1.929        | –            | –            | –            | –            | –            |
| Lu et al. (2019)   | –                    | 0.328           | 0.607        | 0.118        | <b>0.591</b> | –            | –            | –            |
| naive              | 0.461                | 0.492           | 0.719        | 0.089        | 0.942        | 1.013        | 0.307        | 0.642        |
| <b>MAE</b>         |                      |                 |              |              |              |              |              |              |
| ARGOX              | <b>0.328</b>         | <b>0.334</b>    | <b>0.389</b> | 0.224        | <b>0.527</b> | <b>0.394</b> | <b>0.309</b> | <b>0.496</b> |
| VAR                | 0.664                | 0.562           | 0.733        | 0.530        | 0.675        | 1.038        | 0.692        | 1.673        |
| GFT                | –                    | –               | 0.983        | –            | –            | –            | –            | –            |
| Lu et al. (2019)   | –                    | –               | –            | –            | –            | –            | –            | –            |
| naive              | 0.405                | 0.397           | 0.481        | <b>0.222</b> | 0.674        | 0.709        | 0.381        | 0.586        |
| <b>Correlation</b> |                      |                 |              |              |              |              |              |              |
| ARGOX              | <b>0.980</b>         | <b>0.967</b>    | <b>0.969</b> | <b>0.901</b> | 0.953        | <b>0.992</b> | <b>0.955</b> | <b>0.967</b> |
| VAR                | 0.919                | 0.918           | 0.919        | 0.697        | 0.919        | 0.954        | 0.871        | 0.699        |
| GFT                | –                    | –               | 0.962        | –            | –            | –            | –            | –            |
| Lu et al. (2019)   | –                    | 0.965           | 0.960        | 0.860        | <b>0.961</b> | –            | –            | –            |
| naive              | 0.965                | 0.948           | 0.945        | 0.874        | 0.929        | 0.965        | 0.937        | 0.959        |

**Table S20.** Comparison of different methods for state-level %ILI estimation in Kansas (KS). The MSE, MAE, and correlation are reported. The method with the best performance is highlighted in boldface for each metric in each period.

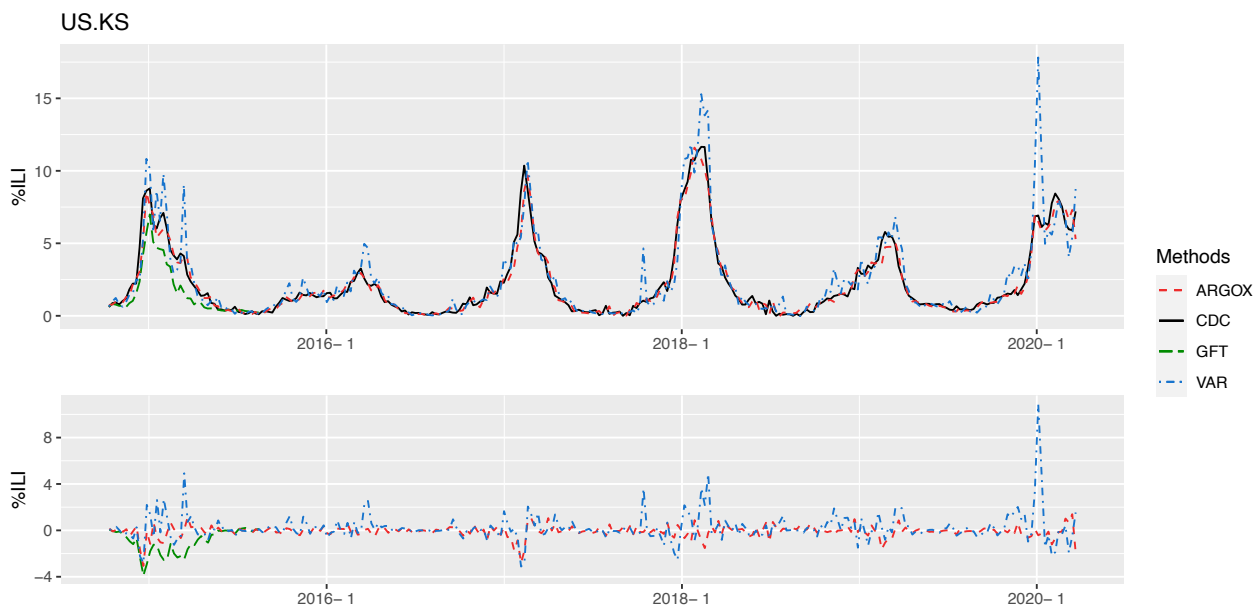

**Figure S16.** Plots of the %ILI estimates (top) and the estimation errors (bottom) for Kansas (KS).

|                    | Whole period '14-'20 | Overall '14-'17 | '14-'15      | '15-'16      | '16-'17      | '17-'18      | '18-'19      | '19-'20      |
|--------------------|----------------------|-----------------|--------------|--------------|--------------|--------------|--------------|--------------|
| <b>MSE</b>         |                      |                 |              |              |              |              |              |              |
| ARGOX              | <b>0.467</b>         | <b>0.310</b>    | <b>0.071</b> | <b>0.058</b> | <b>1.049</b> | <b>0.871</b> | <b>0.785</b> | <b>1.342</b> |
| VAR                | 3.082                | 0.823           | 0.508        | 0.076        | 2.562        | 9.726        | 3.600        | 13.010       |
| GFT                | –                    | –               | 7.601        | –            | –            | –            | –            | –            |
| Lu et al. (2019)   | –                    | 0.415           | 0.106        | 0.076        | 1.433        | –            | –            | –            |
| naïve              | 0.724                | 0.447           | 0.137        | 0.079        | 1.494        | 1.641        | 1.078        | 2.174        |
| <b>MAE</b>         |                      |                 |              |              |              |              |              |              |
| ARGOX              | <b>0.385</b>         | <b>0.303</b>    | <b>0.158</b> | <b>0.162</b> | <b>0.788</b> | <b>0.612</b> | <b>0.548</b> | <b>0.810</b> |
| VAR                | 0.777                | 0.408           | 0.288        | 0.194        | 1.014        | 1.715        | 1.293        | 2.222        |
| GFT                | –                    | –               | 1.951        | –            | –            | –            | –            | –            |
| Lu et al. (2019)   | –                    | –               | –            | –            | –            | –            | –            | –            |
| naïve              | 0.466                | 0.351           | 0.197        | 0.190        | 0.913        | 0.851        | 0.680        | 1.072        |
| <b>Correlation</b> |                      |                 |              |              |              |              |              |              |
| ARGOX              | <b>0.971</b>         | <b>0.957</b>    | 0.954        | <b>0.934</b> | <b>0.931</b> | <b>0.971</b> | <b>0.952</b> | <b>0.930</b> |
| VAR                | 0.879                | 0.876           | 0.905        | 0.922        | 0.825        | 0.899        | 0.857        | 0.617        |
| GFT                | –                    | –               | <b>0.964</b> | –            | –            | –            | –            | –            |
| Lu et al. (2019)   | –                    | 0.941           | 0.940        | 0.923        | 0.907        | –            | –            | –            |
| naïve              | 0.955                | 0.936           | 0.910        | 0.908        | 0.898        | 0.943        | 0.934        | 0.891        |

**Table S21.** Comparison of different methods for state-level %ILI estimation in Kentucky (KY). The MSE, MAE, and correlation are reported. The method with the best performance is highlighted in boldface for each metric in each period.

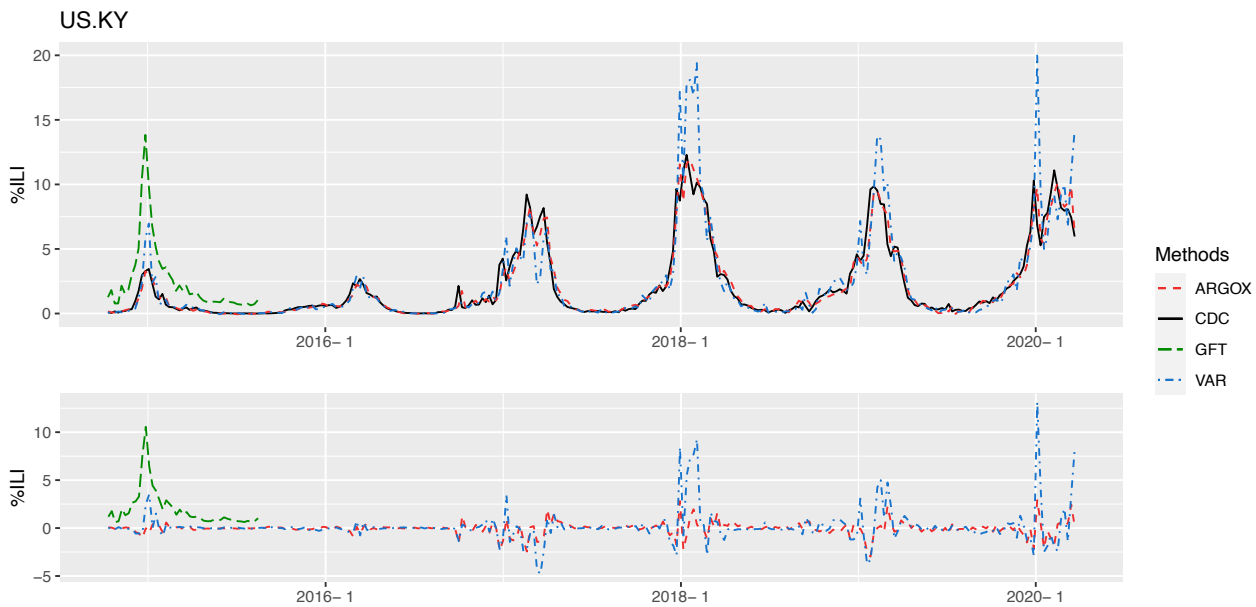

**Figure S17.** Plots of the %ILI estimates (top) and the estimation errors (bottom) for Kentucky (KY).

|                    | Whole period '14-'20 | Overall '14-'17 | '14-'15      | '15-'16      | '16-'17      | '17-'18      | '18-'19      | '19-'20      |
|--------------------|----------------------|-----------------|--------------|--------------|--------------|--------------|--------------|--------------|
| <b>MSE</b>         |                      |                 |              |              |              |              |              |              |
| ARGOX              | <b>0.281</b>         | <b>0.084</b>    | <b>0.162</b> | <b>0.049</b> | <b>0.064</b> | <b>0.403</b> | 0.770        | <b>1.135</b> |
| VAR                | 0.554                | 0.310           | 0.654        | 0.194        | 0.115        | 0.574        | <b>0.758</b> | 2.684        |
| GFT                | –                    | –               | 0.917        | –            | –            | –            | –            | –            |
| Lu et al. (2019)   | –                    | 0.149           | 0.281        | 0.132        | 0.154        | –            | –            | –            |
| naïve              | 0.429                | 0.144           | 0.287        | 0.062        | 0.126        | 0.817        | 0.963        | 1.667        |
| <b>MAE</b>         |                      |                 |              |              |              |              |              |              |
| ARGOX              | <b>0.306</b>         | <b>0.191</b>    | <b>0.258</b> | <b>0.177</b> | <b>0.189</b> | <b>0.444</b> | <b>0.560</b> | <b>0.792</b> |
| VAR                | 0.483                | 0.366           | 0.541        | 0.336        | 0.260        | 0.562        | 0.622        | 1.375        |
| GFT                | –                    | –               | 0.676        | –            | –            | –            | –            | –            |
| Lu et al. (2019)   | –                    | –               | –            | –            | –            | –            | –            | –            |
| naïve              | 0.392                | 0.249           | 0.353        | 0.195        | 0.272        | 0.591        | 0.705        | 1.033        |
| <b>Correlation</b> |                      |                 |              |              |              |              |              |              |
| ARGOX              | <b>0.979</b>         | <b>0.977</b>    | 0.975        | <b>0.921</b> | <b>0.974</b> | <b>0.979</b> | 0.948        | <b>0.884</b> |
| VAR                | 0.960                | 0.942           | 0.947        | 0.711        | 0.951        | 0.972        | <b>0.959</b> | 0.795        |
| GFT                | –                    | –               | <b>0.984</b> | –            | –            | –            | –            | –            |
| Lu et al. (2019)   | –                    | 0.963           | 0.955        | 0.796        | 0.958        | –            | –            | –            |
| naïve              | 0.968                | 0.960           | 0.954        | 0.876        | 0.948        | 0.954        | 0.927        | 0.833        |

**Table S22.** Comparison of different methods for state-level %ILI estimation in Louisiana (LA). The MSE, MAE, and correlation are reported. The method with the best performance is highlighted in boldface for each metric in each period.

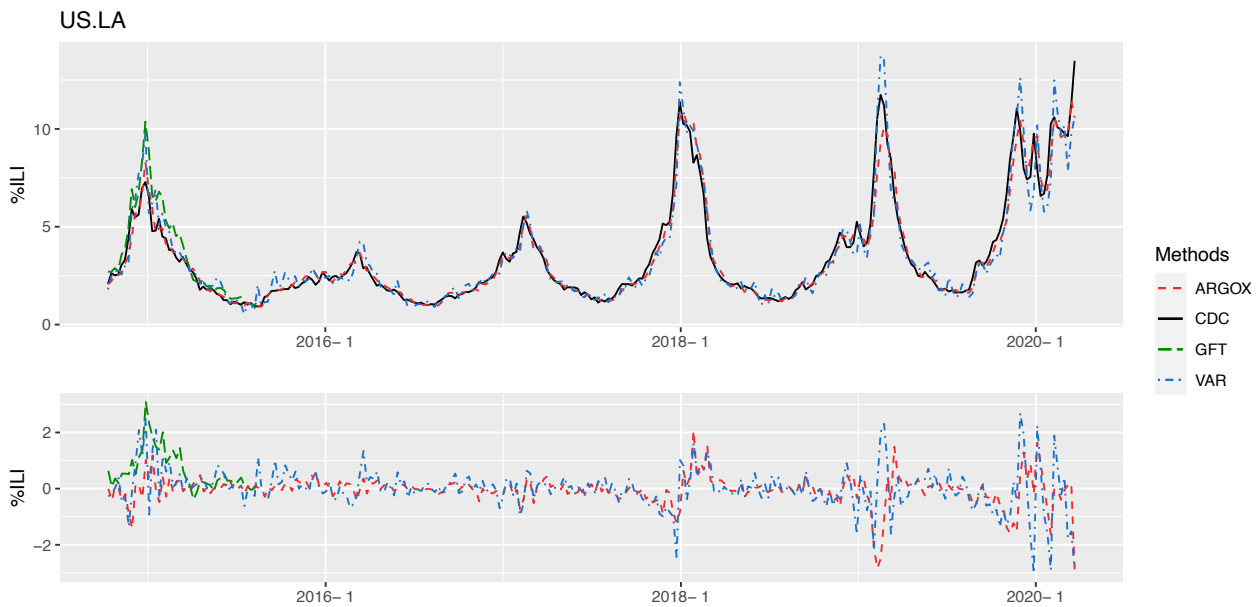

**Figure S18.** Plots of the %ILI estimates (top) and the estimation errors (bottom) for Louisiana (LA).

|                    | Whole period '14-'20 | Overall '14-'17 | '14-'15      | '15-'16      | '16-'17      | '17-'18      | '18-'19      | '19-'20      |
|--------------------|----------------------|-----------------|--------------|--------------|--------------|--------------|--------------|--------------|
| <b>MSE</b>         |                      |                 |              |              |              |              |              |              |
| ARGOX              | <b>0.087</b>         | 0.086           | <b>0.097</b> | 0.109        | 0.078        | <b>0.062</b> | 0.090        | <b>0.293</b> |
| VAR                | 0.176                | 0.172           | 0.230        | 0.159        | 0.132        | 0.139        | 0.317        | 0.401        |
| GFT                | –                    | –               | 0.497        | –            | –            | –            | –            | –            |
| Lu et al. (2019)   | –                    | <b>0.073</b>    | 0.102        | <b>0.094</b> | <b>0.061</b> | –            | –            | –            |
| naive              | 0.097                | 0.105           | 0.118        | 0.141        | 0.088        | 0.062        | <b>0.088</b> | 0.303        |
| <b>MAE</b>         |                      |                 |              |              |              |              |              |              |
| ARGOX              | <b>0.208</b>         | <b>0.225</b>    | <b>0.237</b> | <b>0.264</b> | <b>0.221</b> | <b>0.192</b> | 0.247        | <b>0.331</b> |
| VAR                | 0.313                | 0.318           | 0.368        | 0.301        | 0.277        | 0.303        | 0.460        | 0.520        |
| GFT                | –                    | –               | 0.448        | –            | –            | –            | –            | –            |
| Lu et al. (2019)   | –                    | –               | –            | –            | –            | –            | –            | –            |
| naive              | 0.222                | 0.247           | 0.264        | 0.290        | 0.229        | 0.204        | <b>0.232</b> | 0.350        |
| <b>Correlation</b> |                      |                 |              |              |              |              |              |              |
| ARGOX              | <b>0.957</b>         | 0.853           | 0.901        | 0.310        | 0.794        | <b>0.806</b> | <b>0.943</b> | 0.964        |
| VAR                | 0.912                | 0.716           | 0.783        | 0.114        | 0.628        | 0.626        | 0.823        | 0.952        |
| GFT                | –                    | –               | <b>0.914</b> | –            | –            | –            | –            | –            |
| Lu et al. (2019)   | –                    | <b>0.873</b>    | 0.897        | <b>0.375</b> | <b>0.854</b> | –            | –            | –            |
| naive              | 0.951                | 0.831           | 0.885        | 0.257        | 0.789        | 0.780        | 0.940        | <b>0.964</b> |

**Table S23.** Comparison of different methods for state-level %ILI estimation in Maine (ME). The MSE, MAE, and correlation are reported. The method with the best performance is highlighted in boldface for each metric in each period.

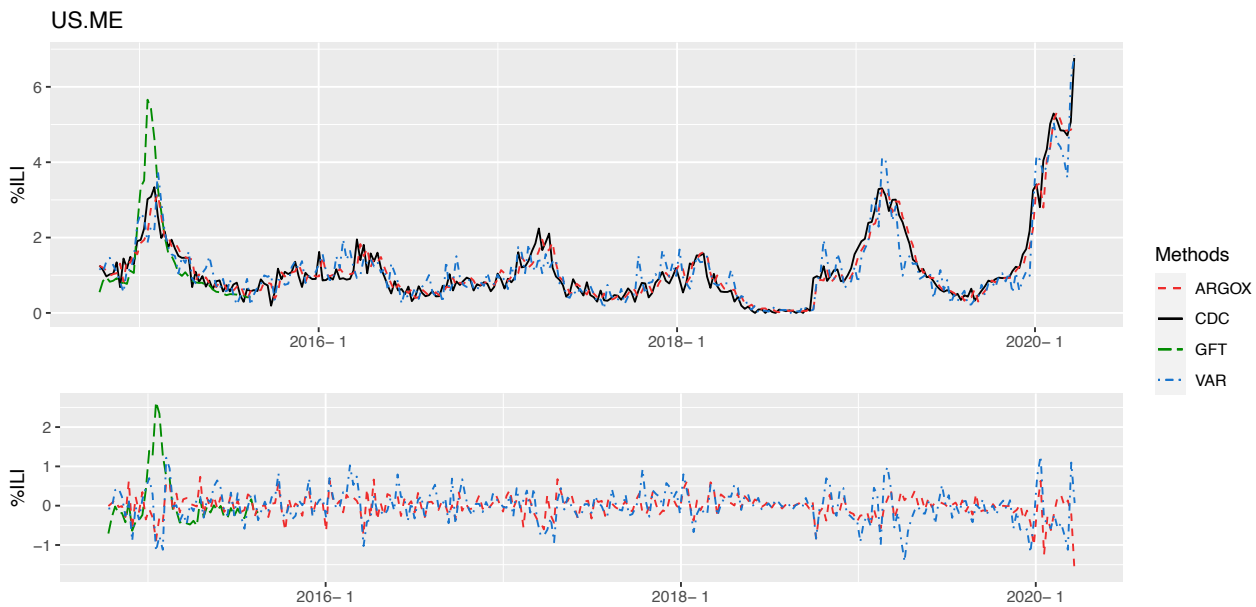

**Figure S19.** Plots of the %ILI estimates (top) and the estimation errors (bottom) for Maine (ME).

|                    | Whole period '14-'20 | Overall '14-'17 | '14-'15      | '15-'16      | '16-'17      | '17-'18      | '18-'19      | '19-'20      |
|--------------------|----------------------|-----------------|--------------|--------------|--------------|--------------|--------------|--------------|
| <b>MSE</b>         |                      |                 |              |              |              |              |              |              |
| ARGOX              | <b>0.267</b>         | <b>0.309</b>    | <b>0.356</b> | <b>0.336</b> | <b>0.361</b> | <b>0.170</b> | <b>0.270</b> | <b>0.574</b> |
| VAR                | 0.831                | 0.846           | 1.053        | 0.645        | 0.846        | 0.463        | 0.620        | 2.937        |
| GFT                | –                    | –               | 1.504        | –            | –            | –            | –            | –            |
| Lu et al. (2019)   | –                    | 0.347           | 0.365        | 0.347        | 0.441        | –            | –            | –            |
| naive              | 0.376                | 0.433           | 0.507        | 0.432        | 0.520        | 0.376        | 0.389        | 0.678        |
| <b>MAE</b>         |                      |                 |              |              |              |              |              |              |
| ARGOX              | <b>0.374</b>         | <b>0.413</b>    | <b>0.396</b> | <b>0.465</b> | <b>0.487</b> | <b>0.331</b> | <b>0.409</b> | <b>0.517</b> |
| VAR                | 0.595                | 0.639           | 0.640        | 0.597        | 0.661        | 0.503        | 0.567        | 1.131        |
| GFT                | –                    | –               | 0.968        | –            | –            | –            | –            | –            |
| Lu et al. (2019)   | –                    | –               | –            | –            | –            | –            | –            | –            |
| naive              | 0.423                | 0.452           | 0.456        | 0.494        | 0.510        | 0.441        | 0.496        | 0.594        |
| <b>Correlation</b> |                      |                 |              |              |              |              |              |              |
| ARGOX              | <b>0.940</b>         | <b>0.846</b>    | 0.804        | <b>0.732</b> | <b>0.918</b> | <b>0.968</b> | <b>0.911</b> | <b>0.947</b> |
| VAR                | 0.837                | 0.653           | 0.741        | 0.585        | 0.788        | 0.905        | 0.788        | 0.819        |
| GFT                | –                    | –               | 0.816        | –            | –            | –            | –            | –            |
| Lu et al. (2019)   | –                    | 0.824           | <b>0.842</b> | 0.718        | 0.885        | –            | –            | –            |
| naive              | 0.916                | 0.800           | 0.729        | 0.695        | 0.872        | 0.925        | 0.876        | 0.937        |

**Table S24.** Comparison of different methods for state-level %ILI estimation in Maryland (MD). The MSE, MAE, and correlation are reported. The method with the best performance is highlighted in boldface for each metric in each period.

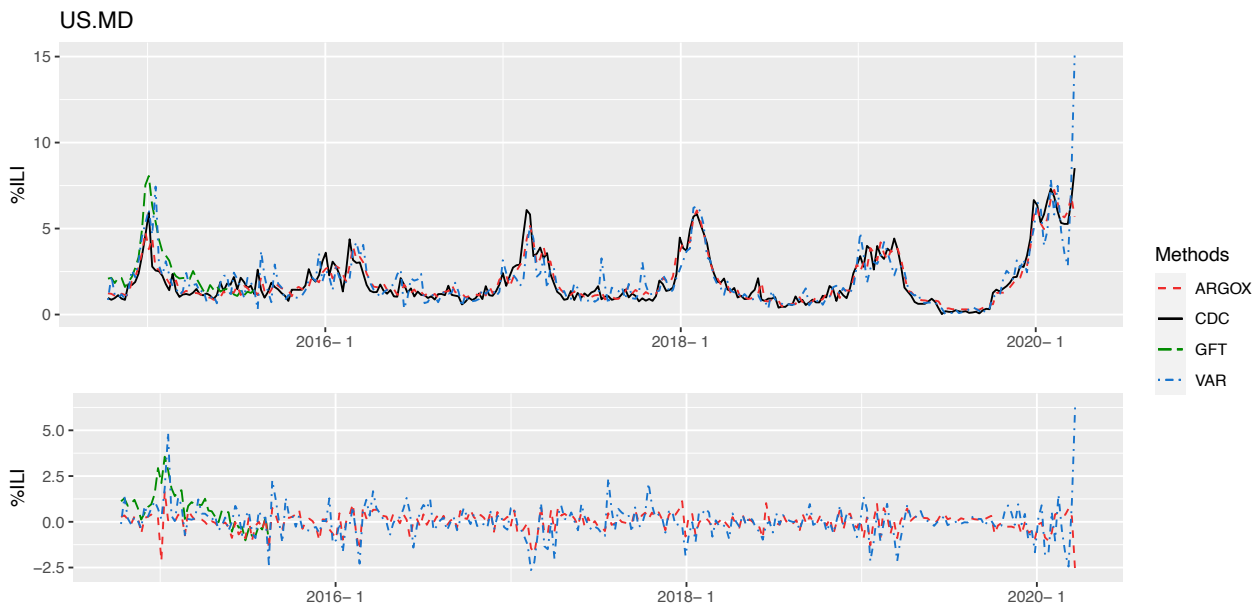

**Figure S20.** Plots of the %ILI estimates (top) and the estimation errors (bottom) for Maryland (MD).



|                    | Whole period '14-'20 | Overall '14-'17 | '14-'15      | '15-'16      | '16-'17      | '17-'18      | '18-'19      | '19-'20      |
|--------------------|----------------------|-----------------|--------------|--------------|--------------|--------------|--------------|--------------|
| <b>MSE</b>         |                      |                 |              |              |              |              |              |              |
| ARGOX              | <b>0.080</b>         | 0.040           | 0.059        | 0.042        | 0.032        | <b>0.125</b> | <b>0.043</b> | <b>0.469</b> |
| VAR                | 0.155                | 0.101           | 0.133        | 0.076        | 0.137        | 0.315        | 0.160        | 0.510        |
| GFT                | –                    | –               | 0.112        | –            | –            | –            | –            | –            |
| Lu et al. (2019)   | –                    | <b>0.027</b>    | <b>0.038</b> | <b>0.034</b> | <b>0.019</b> | –            | –            | –            |
| naive              | 0.126                | 0.070           | 0.100        | 0.066        | 0.073        | 0.284        | 0.105        | 0.528        |
| <b>MAE</b>         |                      |                 |              |              |              |              |              |              |
| ARGOX              | <b>0.161</b>         | <b>0.139</b>    | <b>0.146</b> | <b>0.160</b> | <b>0.145</b> | <b>0.243</b> | <b>0.152</b> | <b>0.397</b> |
| VAR                | 0.266                | 0.234           | 0.263        | 0.219        | 0.283        | 0.393        | 0.293        | 0.540        |
| GFT                | –                    | –               | 0.263        | –            | –            | –            | –            | –            |
| Lu et al. (2019)   | –                    | –               | –            | –            | –            | –            | –            | –            |
| naive              | 0.217                | 0.181           | 0.214        | 0.181        | 0.203        | 0.358        | 0.231        | 0.530        |
| <b>Correlation</b> |                      |                 |              |              |              |              |              |              |
| ARGOX              | <b>0.970</b>         | 0.949           | 0.936        | 0.912        | 0.959        | <b>0.968</b> | <b>0.966</b> | <b>0.930</b> |
| VAR                | 0.938                | 0.874           | 0.869        | 0.845        | 0.818        | 0.927        | 0.884        | 0.928        |
| GFT                | –                    | –               | 0.947        | –            | –            | –            | –            | –            |
| Lu et al. (2019)   | –                    | <b>0.967</b>    | <b>0.966</b> | <b>0.929</b> | <b>0.976</b> | –            | –            | –            |
| naive              | 0.950                | 0.912           | 0.891        | 0.870        | 0.908        | 0.921        | 0.919        | 0.923        |

**Table S25.** Comparison of different methods for state-level %ILI estimation in Massachusetts (MA). The MSE, MAE, and correlation are reported. The method with the best performance is highlighted in boldface for each metric in each period.

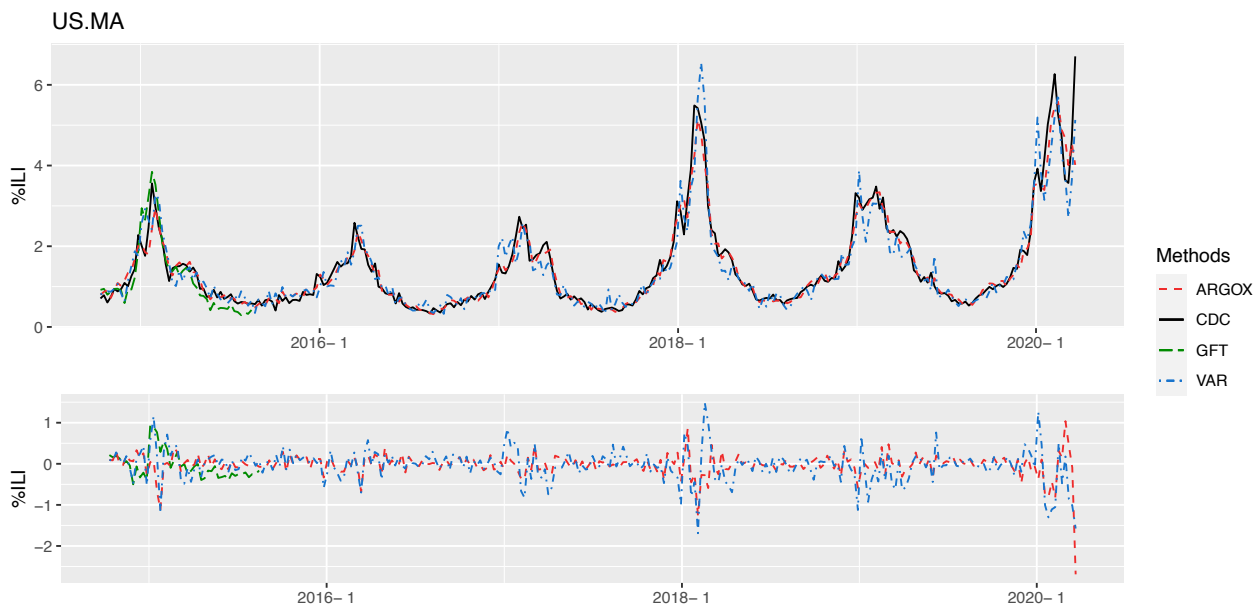

**Figure S21.** Plots of the %ILI estimates (top) and the estimation errors (bottom) for Massachusetts (MA).

|                    | Whole period '14-'20 | Overall '14-'17 | '14-'15      | '15-'16      | '16-'17      | '17-'18      | '18-'19      | '19-'20      |
|--------------------|----------------------|-----------------|--------------|--------------|--------------|--------------|--------------|--------------|
| <b>MSE</b>         |                      |                 |              |              |              |              |              |              |
| ARGOX              | <b>0.073</b>         | <b>0.077</b>    | <b>0.131</b> | <b>0.032</b> | <b>0.093</b> | <b>0.100</b> | <b>0.082</b> | <b>0.119</b> |
| VAR                | 0.177                | 0.168           | 0.174        | 0.174        | 0.249        | 0.318        | 0.181        | 0.317        |
| GFT                | –                    | –               | 1.313        | –            | –            | –            | –            | –            |
| Lu et al. (2019)   | –                    | 0.132           | 0.246        | 0.081        | 0.174        | –            | –            | –            |
| naive              | 0.130                | 0.146           | 0.260        | 0.066        | 0.169        | 0.232        | 0.108        | 0.177        |
| <b>MAE</b>         |                      |                 |              |              |              |              |              |              |
| ARGOX              | <b>0.187</b>         | <b>0.183</b>    | <b>0.237</b> | <b>0.134</b> | <b>0.221</b> | <b>0.256</b> | <b>0.222</b> | <b>0.253</b> |
| VAR                | 0.292                | 0.293           | 0.284        | 0.309        | 0.403        | 0.413        | 0.314        | 0.380        |
| GFT                | –                    | –               | 0.957        | –            | –            | –            | –            | –            |
| Lu et al. (2019)   | –                    | –               | –            | –            | –            | –            | –            | –            |
| naive              | 0.236                | 0.227           | 0.284        | 0.184        | 0.299        | 0.392        | 0.255        | 0.308        |
| <b>Correlation</b> |                      |                 |              |              |              |              |              |              |
| ARGOX              | <b>0.969</b>         | <b>0.962</b>    | 0.935        | <b>0.963</b> | <b>0.955</b> | <b>0.977</b> | <b>0.873</b> | <b>0.949</b> |
| VAR                | 0.934                | 0.928           | 0.938        | 0.905        | 0.874        | 0.940        | 0.795        | 0.871        |
| GFT                | –                    | –               | <b>0.979</b> | –            | –            | –            | –            | –            |
| Lu et al. (2019)   | –                    | 0.936           | 0.919        | 0.908        | 0.928        | –            | –            | –            |
| naive              | 0.945                | 0.928           | 0.868        | 0.917        | 0.917        | 0.939        | 0.837        | 0.930        |

**Table S26.** Comparison of different methods for state-level %ILI estimation in Michigan (MI). The MSE, MAE, and correlation are reported. The method with the best performance is highlighted in boldface for each metric in each period.

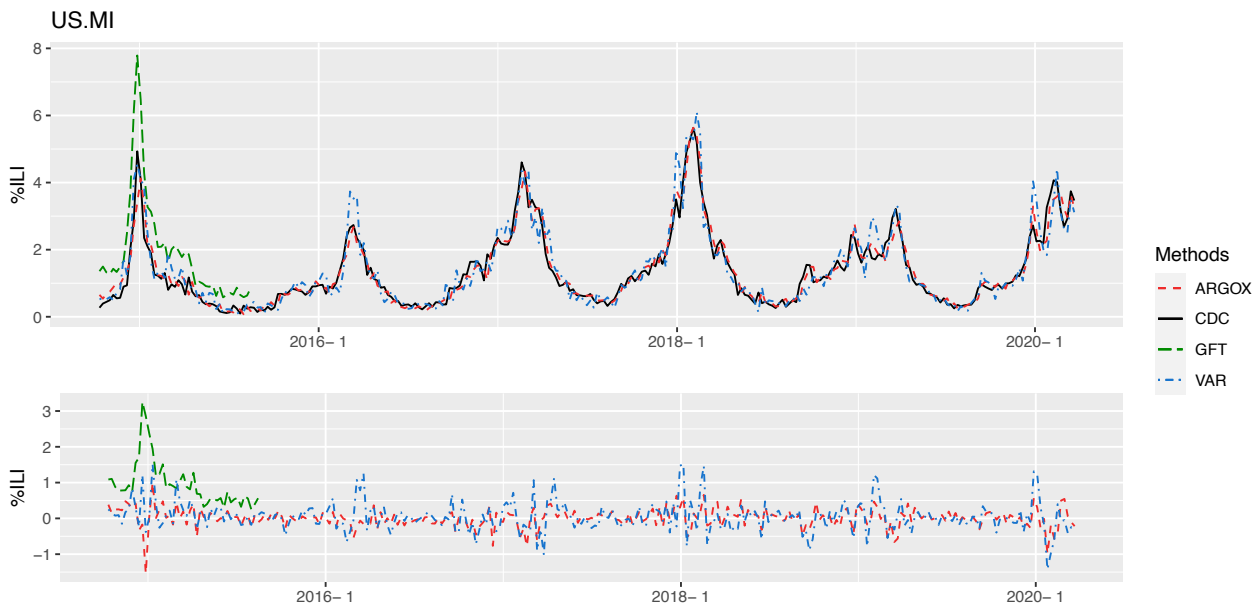

**Figure S22.** Plots of the %ILI estimates (top) and the estimation errors (bottom) for Michigan (MI).

|                    | Whole period '14-'20 | Overall '14-'17 | '14-'15      | '15-'16      | '16-'17      | '17-'18      | '18-'19      | '19-'20      |
|--------------------|----------------------|-----------------|--------------|--------------|--------------|--------------|--------------|--------------|
| <b>MSE</b>         |                      |                 |              |              |              |              |              |              |
| ARGOX              | <b>0.309</b>         | <b>0.251</b>    | <b>0.388</b> | <b>0.283</b> | <b>0.174</b> | <b>0.148</b> | <b>0.266</b> | <b>1.447</b> |
| VAR                | 0.953                | 1.049           | 1.552        | 0.634        | 1.414        | 0.387        | 1.047        | 2.487        |
| GFT                | –                    | –               | 0.544        | –            | –            | –            | –            | –            |
| Lu et al. (2019)   | –                    | 0.287           | 0.472        | 0.370        | 0.215        | –            | –            | –            |
| naive              | 0.499                | 0.443           | 0.722        | 0.510        | 0.277        | 0.247        | 0.289        | 2.395        |
| <b>MAE</b>         |                      |                 |              |              |              |              |              |              |
| ARGOX              | <b>0.371</b>         | <b>0.374</b>    | <b>0.436</b> | <b>0.460</b> | <b>0.333</b> | <b>0.320</b> | <b>0.364</b> | <b>0.773</b> |
| VAR                | 0.644                | 0.640           | 0.713        | 0.608        | 0.779        | 0.475        | 0.779        | 1.143        |
| GFT                | –                    | –               | 0.527        | –            | –            | –            | –            | –            |
| Lu et al. (2019)   | –                    | –               | –            | –            | –            | –            | –            | –            |
| naive              | 0.441                | 0.440           | 0.535        | 0.544        | 0.378        | 0.388        | 0.402        | 0.965        |
| <b>Correlation</b> |                      |                 |              |              |              |              |              |              |
| ARGOX              | <b>0.929</b>         | <b>0.922</b>    | 0.923        | <b>0.770</b> | <b>0.935</b> | <b>0.978</b> | <b>0.825</b> | <b>0.726</b> |
| VAR                | 0.815                | 0.779           | 0.839        | 0.576        | 0.536        | 0.948        | 0.662        | 0.602        |
| GFT                | –                    | –               | <b>0.931</b> | –            | –            | –            | –            | –            |
| Lu et al. (2019)   | –                    | 0.907           | 0.910        | 0.703        | 0.915        | –            | –            | –            |
| naive              | 0.888                | 0.865           | 0.855        | 0.629        | 0.888        | 0.960        | 0.807        | 0.575        |

**Table S27.** Comparison of different methods for state-level %ILI estimation in Minnesota (MN). The MSE, MAE, and correlation are reported. The method with the best performance is highlighted in boldface for each metric in each period.

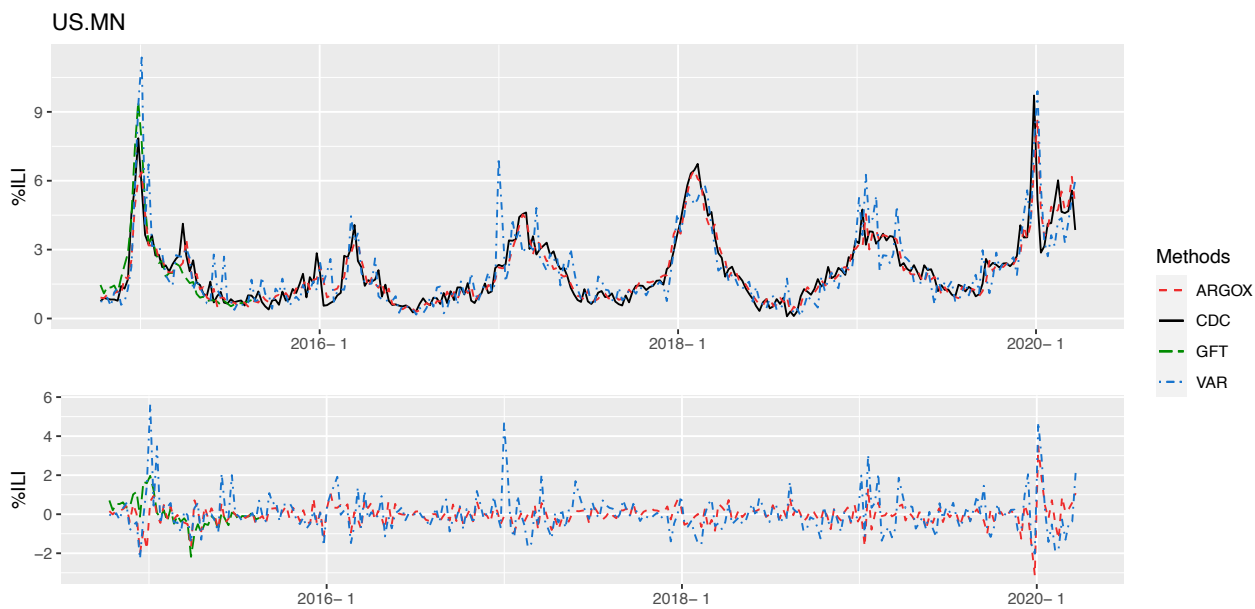

**Figure S23.** Plots of the %ILI estimates (top) and the estimation errors (bottom) for Minnesota (MN).

|                    | Whole period '14-'20 | Overall '14-'17 | '14-'15      | '15-'16      | '16-'17      | '17-'18      | '18-'19      | '19-'20      |
|--------------------|----------------------|-----------------|--------------|--------------|--------------|--------------|--------------|--------------|
| <b>MSE</b>         |                      |                 |              |              |              |              |              |              |
| ARGOX              | <b>0.334</b>         | <b>0.224</b>    | <b>0.381</b> | <b>0.092</b> | <b>0.241</b> | <b>0.961</b> | <b>0.358</b> | <b>0.640</b> |
| VAR                | 0.821                | 0.462           | 0.663        | 0.439        | 0.428        | 2.412        | 0.989        | 1.619        |
| GFT                | –                    | –               | 1.936        | –            | –            | –            | –            | –            |
| Lu et al. (2019)   | –                    | –               | –            | –            | –            | –            | –            | –            |
| naive              | 0.622                | 0.476           | 0.931        | 0.200        | 0.422        | 1.690        | 0.706        | 1.043        |
| <b>MAE</b>         |                      |                 |              |              |              |              |              |              |
| ARGOX              | <b>0.384</b>         | <b>0.335</b>    | <b>0.413</b> | <b>0.261</b> | <b>0.392</b> | <b>0.677</b> | <b>0.415</b> | <b>0.665</b> |
| VAR                | 0.614                | 0.510           | 0.571        | 0.533        | 0.531        | 1.032        | 0.724        | 0.939        |
| GFT                | –                    | –               | 1.220        | –            | –            | –            | –            | –            |
| Lu et al. (2019)   | –                    | –               | –            | –            | –            | –            | –            | –            |
| naive              | 0.508                | 0.450           | 0.606        | 0.344        | 0.519        | 0.882        | 0.601        | 0.851        |
| <b>Correlation</b> |                      |                 |              |              |              |              |              |              |
| ARGOX              | <b>0.967</b>         | <b>0.965</b>    | <b>0.969</b> | <b>0.921</b> | <b>0.932</b> | <b>0.963</b> | <b>0.962</b> | <b>0.894</b> |
| VAR                | 0.932                | 0.932           | 0.947        | 0.731        | 0.879        | 0.931        | 0.925        | 0.778        |
| GFT                | –                    | –               | 0.960        | –            | –            | –            | –            | –            |
| Lu et al. (2019)   | –                    | –               | –            | –            | –            | –            | –            | –            |
| naive              | 0.940                | 0.926           | 0.923        | 0.835        | 0.883        | 0.930        | 0.912        | 0.822        |

**Table S28.** Comparison of different methods for state-level %ILI estimation in Mississippi (MS). The MSE, MAE, and correlation are reported. The method with the best performance is highlighted in boldface for each metric in each period.

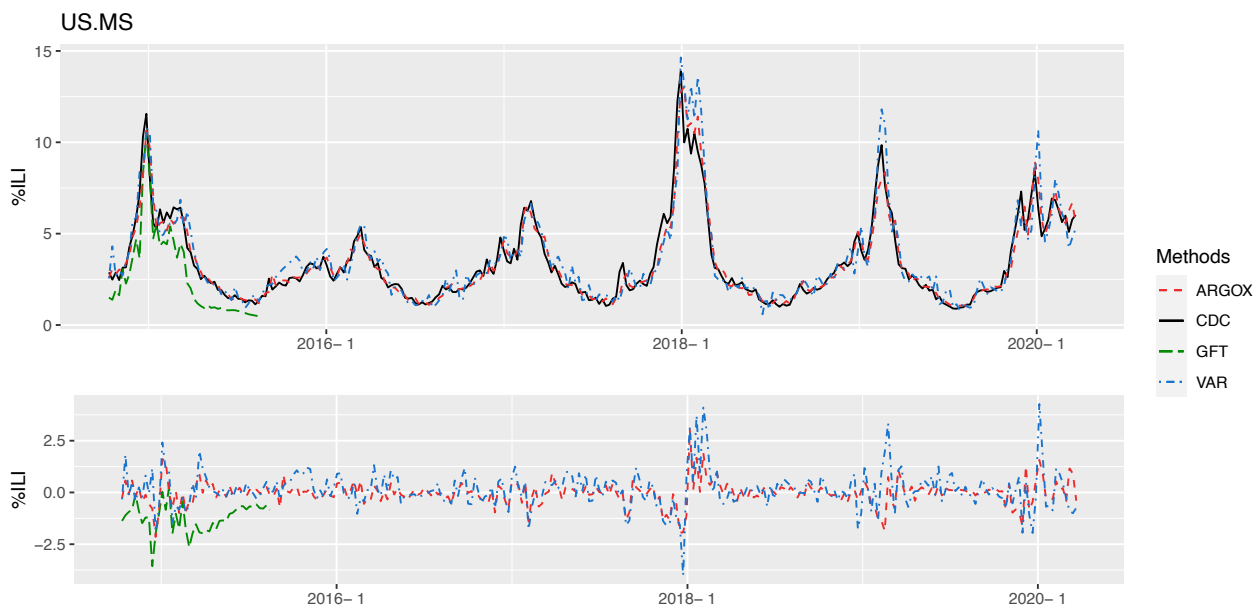

**Figure S24.** Plots of the %ILI estimates (top) and the estimation errors (bottom) for Mississippi (MS).

|                    | Whole period '14-'20 | Overall '14-'17 | '14-'15      | '15-'16      | '16-'17      | '17-'18      | '18-'19      | '19-'20      |
|--------------------|----------------------|-----------------|--------------|--------------|--------------|--------------|--------------|--------------|
| <b>MSE</b>         |                      |                 |              |              |              |              |              |              |
| ARGOX              | <b>0.442</b>         | <b>0.241</b>    | <b>0.336</b> | <b>0.139</b> | <b>0.353</b> | <b>0.817</b> | <b>0.654</b> | <b>1.709</b> |
| VAR                | 2.090                | 0.934           | 0.843        | 0.969        | 1.633        | 6.039        | 1.068        | 9.347        |
| GFT                | –                    | –               | 0.482        | –            | –            | –            | –            | –            |
| Lu et al. (2019)   | –                    | –               | –            | –            | –            | –            | –            | –            |
| naive              | 0.767                | 0.412           | 0.741        | 0.155        | 0.478        | 1.818        | 1.017        | 2.692        |
| <b>MAE</b>         |                      |                 |              |              |              |              |              |              |
| ARGOX              | <b>0.392</b>         | <b>0.319</b>    | <b>0.358</b> | 0.314        | <b>0.379</b> | <b>0.571</b> | <b>0.559</b> | <b>0.918</b> |
| VAR                | 0.712                | 0.611           | 0.637        | 0.639        | 0.795        | 1.068        | 0.691        | 2.100        |
| GFT                | –                    | –               | 0.570        | –            | –            | –            | –            | –            |
| Lu et al. (2019)   | –                    | –               | –            | –            | –            | –            | –            | –            |
| naive              | 0.499                | 0.392           | 0.486        | <b>0.311</b> | 0.466        | 0.883        | 0.718        | 1.114        |
| <b>Correlation</b> |                      |                 |              |              |              |              |              |              |
| ARGOX              | <b>0.963</b>         | <b>0.951</b>    | 0.956        | <b>0.775</b> | <b>0.939</b> | <b>0.972</b> | <b>0.936</b> | <b>0.929</b> |
| VAR                | 0.866                | 0.852           | 0.883        | 0.626        | 0.844        | 0.897        | 0.901        | 0.658        |
| GFT                | –                    | –               | <b>0.959</b> | –            | –            | –            | –            | –            |
| Lu et al. (2019)   | –                    | –               | –            | –            | –            | –            | –            | –            |
| naive              | 0.935                | 0.916           | 0.898        | 0.761        | 0.919        | 0.938        | 0.890        | 0.895        |

**Table S29.** Comparison of different methods for state-level %ILI estimation in Missouri (MO). The MSE, MAE, and correlation are reported. The method with the best performance is highlighted in boldface for each metric in each period.

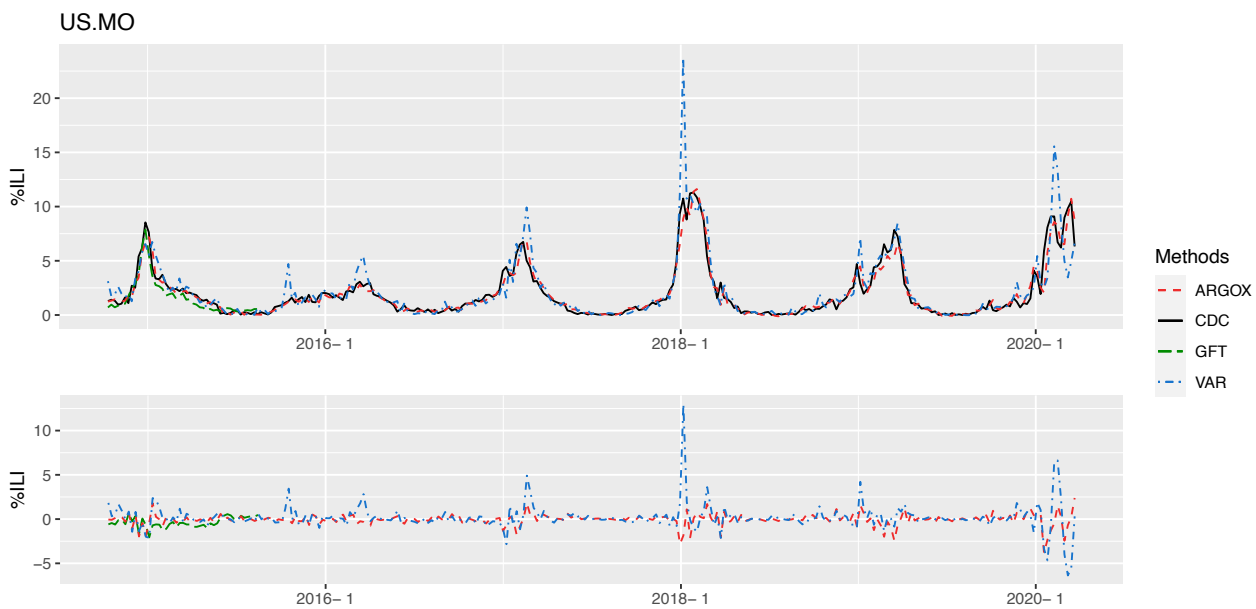

**Figure S25.** Plots of the %ILI estimates (top) and the estimation errors (bottom) for Missouri (MO).

|                    | Whole period '14-'20 | Overall '14-'17 | '14-'15      | '15-'16      | '16-'17      | '17-'18      | '18-'19      | '19-'20      |
|--------------------|----------------------|-----------------|--------------|--------------|--------------|--------------|--------------|--------------|
| <b>MSE</b>         |                      |                 |              |              |              |              |              |              |
| ARGOX              | <b>0.055</b>         | <b>0.039</b>    | <b>0.061</b> | <b>0.055</b> | <b>0.020</b> | <b>0.022</b> | 0.194        | <b>0.121</b> |
| VAR                | 0.198                | 0.157           | 0.275        | 0.080        | 0.136        | 0.037        | 0.351        | 0.885        |
| GFT                | –                    | –               | 1.095        | –            | –            | –            | –            | –            |
| Lu et al. (2019)   | –                    | –               | –            | –            | –            | –            | –            | –            |
| naive              | 0.061                | 0.049           | 0.079        | 0.067        | 0.024        | 0.029        | <b>0.184</b> | 0.142        |
| <b>MAE</b>         |                      |                 |              |              |              |              |              |              |
| ARGOX              | <b>0.143</b>         | <b>0.131</b>    | 0.181        | <b>0.164</b> | <b>0.100</b> | <b>0.110</b> | 0.322        | <b>0.254</b> |
| VAR                | 0.248                | 0.232           | 0.330        | 0.216        | 0.212        | 0.140        | 0.449        | 0.598        |
| GFT                | –                    | –               | 0.870        | –            | –            | –            | –            | –            |
| Lu et al. (2019)   | –                    | –               | –            | –            | –            | –            | –            | –            |
| naive              | 0.144                | 0.132           | <b>0.179</b> | 0.169        | 0.112        | 0.120        | <b>0.320</b> | 0.271        |
| <b>Correlation</b> |                      |                 |              |              |              |              |              |              |
| ARGOX              | <b>0.967</b>         | <b>0.854</b>    | 0.893        | <b>0.419</b> | <b>0.580</b> | <b>0.779</b> | <b>0.919</b> | <b>0.972</b> |
| VAR                | 0.877                | 0.552           | 0.585        | 0.367        | 0.398        | 0.668        | 0.897        | 0.802        |
| GFT                | –                    | –               | <b>0.939</b> | –            | –            | –            | –            | –            |
| Lu et al. (2019)   | –                    | –               | –            | –            | –            | –            | –            | –            |
| naive              | 0.963                | 0.821           | 0.865        | 0.341        | 0.499        | 0.736        | 0.916        | 0.969        |

**Table S30.** Comparison of different methods for state-level %ILI estimation in Montana (MT). The MSE, MAE, and correlation are reported. The method with the best performance is highlighted in boldface for each metric in each period.

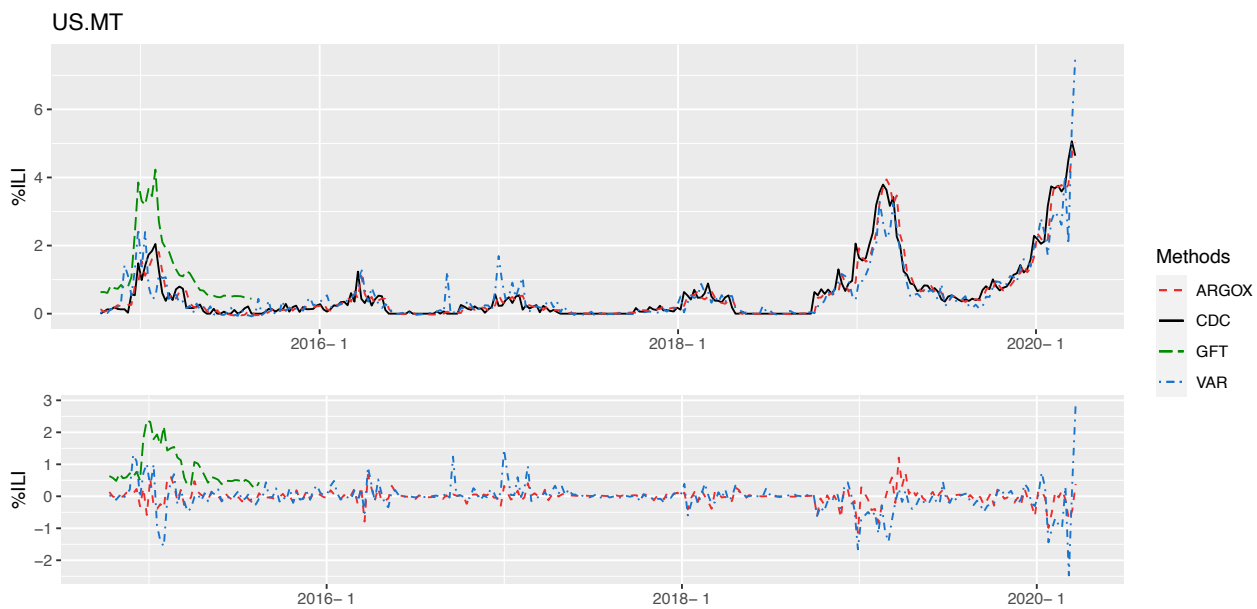

**Figure S26.** Plots of the %ILI estimates (top) and the estimation errors (bottom) for Montana (MT).

|                    | Whole period '14-'20 | Overall '14-'17 | '14-'15      | '15-'16      | '16-'17      | '17-'18      | '18-'19      | '19-'20      |
|--------------------|----------------------|-----------------|--------------|--------------|--------------|--------------|--------------|--------------|
| <b>MSE</b>         |                      |                 |              |              |              |              |              |              |
| ARGOX              | <b>0.380</b>         | <b>0.231</b>    | <b>0.470</b> | 0.086        | <b>0.195</b> | <b>0.684</b> | <b>0.755</b> | <b>0.840</b> |
| VAR                | 2.520                | 1.172           | 3.148        | 0.093        | 0.353        | 2.474        | 4.081        | 13.168       |
| GFT                | –                    | –               | 0.678        | –            | –            | –            | –            | –            |
| Lu et al. (2019)   | –                    | 0.265           | 0.605        | 0.141        | 0.251        | –            | –            | –            |
| naive              | 0.497                | 0.303           | 0.636        | <b>0.082</b> | 0.272        | 0.822        | 0.944        | 1.341        |
| <b>MAE</b>         |                      |                 |              |              |              |              |              |              |
| ARGOX              | <b>0.392</b>         | <b>0.287</b>    | <b>0.389</b> | 0.234        | <b>0.303</b> | <b>0.617</b> | <b>0.574</b> | <b>0.704</b> |
| VAR                | 0.779                | 0.490           | 0.881        | 0.253        | 0.373        | 1.175        | 1.295        | 1.846        |
| GFT                | –                    | –               | 0.501        | –            | –            | –            | –            | –            |
| Lu et al. (2019)   | –                    | –               | –            | –            | –            | –            | –            | –            |
| naive              | 0.434                | 0.318           | 0.460        | <b>0.211</b> | 0.353        | 0.692        | 0.684        | 0.736        |
| <b>Correlation</b> |                      |                 |              |              |              |              |              |              |
| ARGOX              | <b>0.950</b>         | 0.866           | 0.835        | 0.631        | <b>0.897</b> | <b>0.925</b> | <b>0.918</b> | <b>0.900</b> |
| VAR                | 0.769                | 0.495           | 0.255        | 0.498        | 0.818        | 0.723        | 0.628        | 0.735        |
| GFT                | –                    | –               | 0.846        | –            | –            | –            | –            | –            |
| Lu et al. (2019)   | –                    | <b>0.878</b>    | <b>0.861</b> | <b>0.680</b> | 0.863        | –            | –            | –            |
| naive              | 0.936                | 0.836           | 0.788        | 0.608        | 0.859        | 0.902        | 0.901        | 0.842        |

**Table S31.** Comparison of different methods for state-level %ILI estimation in Nebraska (NE). The MSE, MAE, and correlation are reported. The method with the best performance is highlighted in boldface for each metric in each period.

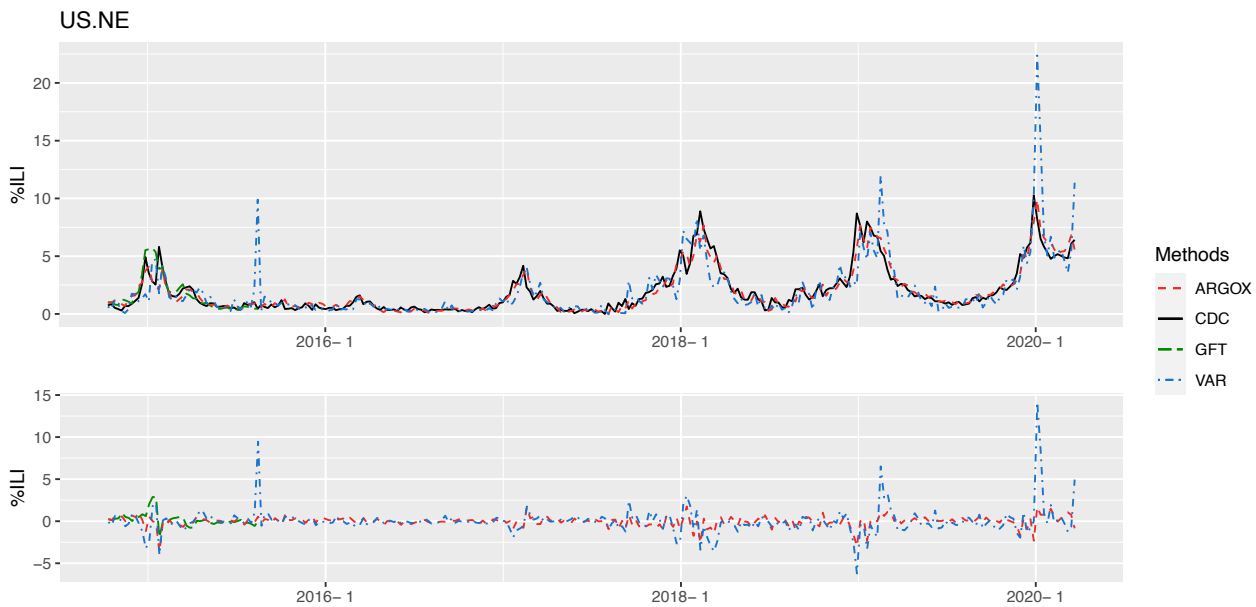

**Figure S27.** Plots of the %ILI estimates (top) and the estimation errors (bottom) for Nebraska (NE).

|                    | Whole period '14-'20 | Overall '14-'17 | '14-'15      | '15-'16      | '16-'17      | '17-'18      | '18-'19      | '19-'20      |
|--------------------|----------------------|-----------------|--------------|--------------|--------------|--------------|--------------|--------------|
| <b>MSE</b>         |                      |                 |              |              |              |              |              |              |
| ARGOX              | <b>0.096</b>         | <b>0.089</b>    | <b>0.132</b> | <b>0.096</b> | 0.066        | <b>0.046</b> | <b>0.142</b> | 0.322        |
| VAR                | 0.232                | 0.163           | 0.185        | 0.199        | 0.187        | 0.395        | 0.342        | 0.687        |
| GFT                | –                    | –               | 2.565        | –            | –            | –            | –            | –            |
| Lu et al. (2019)   | –                    | 0.112           | 0.261        | 0.112        | <b>0.053</b> | –            | –            | –            |
| naive              | 0.115                | 0.109           | 0.179        | 0.131        | 0.060        | 0.122        | 0.184        | <b>0.256</b> |
| <b>MAE</b>         |                      |                 |              |              |              |              |              |              |
| ARGOX              | <b>0.208</b>         | <b>0.210</b>    | <b>0.257</b> | <b>0.224</b> | 0.197        | <b>0.170</b> | <b>0.231</b> | 0.477        |
| VAR                | 0.318                | 0.295           | 0.328        | 0.330        | 0.335        | 0.374        | 0.423        | 0.607        |
| GFT                | –                    | –               | 1.509        | –            | –            | –            | –            | –            |
| Lu et al. (2019)   | –                    | –               | –            | –            | –            | –            | –            | –            |
| naive              | 0.224                | 0.218           | 0.288        | 0.251        | <b>0.185</b> | 0.262        | 0.283        | <b>0.378</b> |
| <b>Correlation</b> |                      |                 |              |              |              |              |              |              |
| ARGOX              | <b>0.940</b>         | <b>0.932</b>    | <b>0.948</b> | <b>0.901</b> | 0.876        | <b>0.977</b> | <b>0.920</b> | 0.699        |
| VAR                | 0.874                | 0.882           | 0.927        | 0.829        | 0.769        | 0.944        | 0.863        | 0.705        |
| GFT                | –                    | –               | 0.936        | –            | –            | –            | –            | –            |
| Lu et al. (2019)   | –                    | 0.915           | 0.896        | 0.881        | <b>0.884</b> | –            | –            | –            |
| naive              | 0.929                | 0.919           | 0.929        | 0.859        | 0.865        | 0.933        | 0.898        | <b>0.766</b> |

**Table S32.** Comparison of different methods for state-level %ILI estimation in Nevada (NV). The MSE, MAE, and correlation are reported. The method with the best performance is highlighted in boldface for each metric in each period.

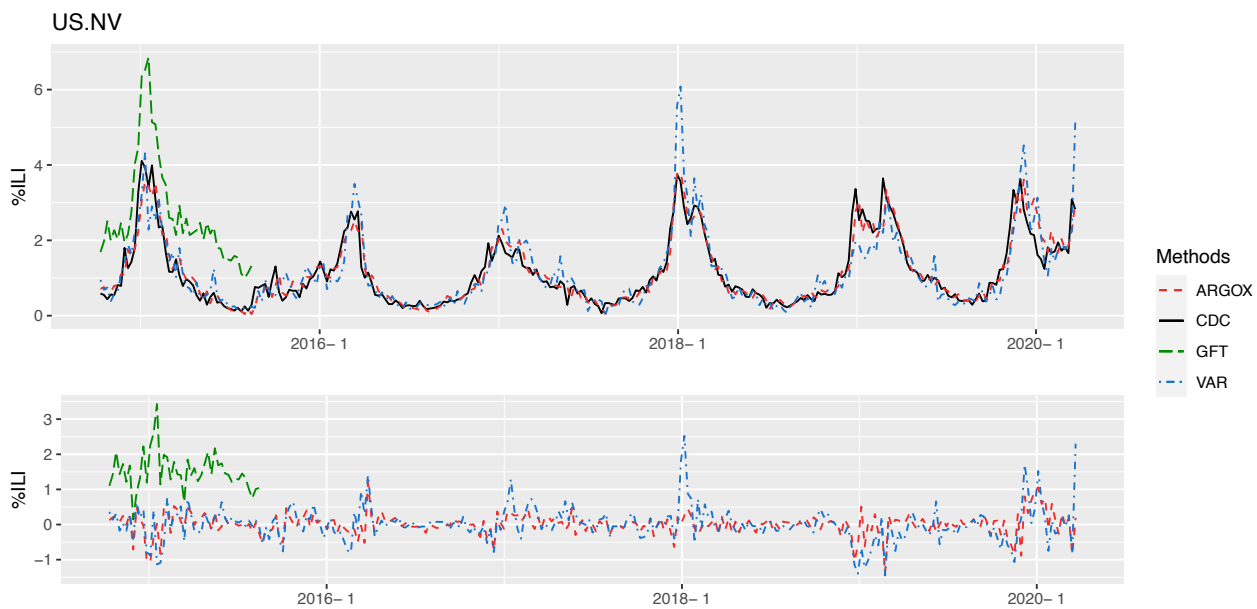

**Figure S28.** Plots of the %ILI estimates (top) and the estimation errors (bottom) for Nevada (NV).



|                    | Whole period '14-'20 | Overall '14-'17 | '14-'15      | '15-'16      | '16-'17      | '17-'18      | '18-'19      | '19-'20      |
|--------------------|----------------------|-----------------|--------------|--------------|--------------|--------------|--------------|--------------|
| <b>MSE</b>         |                      |                 |              |              |              |              |              |              |
| ARGOX              | <b>0.175</b>         | 0.054           | 0.058        | <b>0.021</b> | 0.111        | 0.470        | <b>0.334</b> | <b>0.476</b> |
| VAR                | 0.363                | 0.081           | 0.113        | 0.048        | 0.086        | <b>0.447</b> | 0.617        | 1.991        |
| GFT                | –                    | –               | 1.113        | –            | –            | –            | –            | –            |
| Lu et al. (2019)   | –                    | <b>0.045</b>    | 0.061        | 0.030        | <b>0.071</b> | –            | –            | –            |
| naive              | 0.201                | 0.056           | <b>0.052</b> | 0.027        | 0.120        | 0.616        | 0.374        | 0.477        |
| <b>MAE</b>         |                      |                 |              |              |              |              |              |              |
| ARGOX              | <b>0.247</b>         | <b>0.152</b>    | 0.150        | <b>0.110</b> | 0.232        | <b>0.452</b> | <b>0.337</b> | <b>0.462</b> |
| VAR                | 0.357                | 0.198           | 0.226        | 0.168        | <b>0.222</b> | 0.466        | 0.539        | 0.989        |
| GFT                | –                    | –               | 0.844        | –            | –            | –            | –            | –            |
| Lu et al. (2019)   | –                    | –               | –            | –            | –            | –            | –            | –            |
| naive              | 0.266                | 0.153           | <b>0.142</b> | 0.116        | 0.242        | 0.464        | 0.384        | 0.529        |
| <b>Correlation</b> |                      |                 |              |              |              |              |              |              |
| ARGOX              | <b>0.913</b>         | 0.846           | 0.887        | <b>0.912</b> | 0.672        | 0.916        | <b>0.750</b> | 0.909        |
| VAR                | 0.817                | 0.776           | 0.766        | 0.778        | 0.783        | <b>0.930</b> | 0.554        | 0.572        |
| GFT                | –                    | –               | <b>0.915</b> | –            | –            | –            | –            | –            |
| Lu et al. (2019)   | –                    | <b>0.877</b>    | 0.887        | 0.894        | <b>0.813</b> | –            | –            | –            |
| naive              | 0.904                | 0.854           | 0.902        | 0.883        | 0.692        | 0.887        | 0.743        | <b>0.914</b> |

**Table S33.** Comparison of different methods for state-level %ILI estimation in New Hampshire (NH). The MSE, MAE, and correlation are reported. The method with the best performance is highlighted in boldface for each metric in each period.

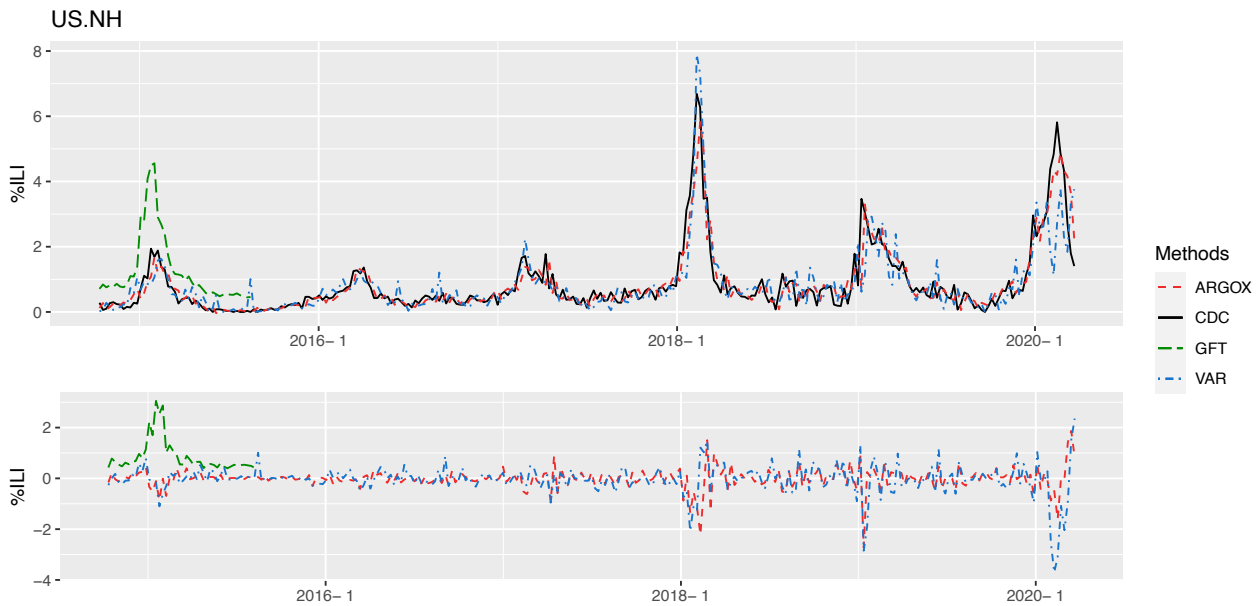

**Figure S29.** Plots of the %ILI estimates (top) and the estimation errors (bottom) for New Hampshire (NH).

|                    | Whole period '14-'20 | Overall '14-'17 | '14-'15      | '15-'16      | '16-'17      | '17-'18      | '18-'19      | '19-'20      |
|--------------------|----------------------|-----------------|--------------|--------------|--------------|--------------|--------------|--------------|
| <b>MSE</b>         |                      |                 |              |              |              |              |              |              |
| ARGOX              | <b>0.301</b>         | 0.244           | <b>0.218</b> | 0.228        | 0.408        | <b>0.427</b> | <b>0.041</b> | <b>1.491</b> |
| VAR                | 0.757                | 0.797           | 1.205        | 0.440        | 1.098        | 1.405        | 0.257        | 1.542        |
| GFT                | –                    | –               | 0.644        | –            | –            | –            | –            | –            |
| Lu et al. (2019)   | –                    | <b>0.243</b>    | 0.250        | <b>0.228</b> | 0.466        | –            | –            | –            |
| naive              | 0.419                | 0.275           | 0.318        | 0.253        | <b>0.367</b> | 0.979        | 0.186        | 1.689        |
| <b>MAE</b>         |                      |                 |              |              |              |              |              |              |
| ARGOX              | <b>0.325</b>         | <b>0.381</b>    | <b>0.354</b> | <b>0.373</b> | 0.519        | <b>0.452</b> | <b>0.160</b> | <b>0.584</b> |
| VAR                | 0.562                | 0.621           | 0.775        | 0.462        | 0.836        | 0.727        | 0.350        | 0.811        |
| GFT                | –                    | –               | 0.672        | –            | –            | –            | –            | –            |
| Lu et al. (2019)   | –                    | –               | –            | –            | –            | –            | –            | –            |
| naive              | 0.387                | 0.384           | 0.412        | 0.376        | <b>0.456</b> | 0.594        | 0.303        | 0.797        |
| <b>Correlation</b> |                      |                 |              |              |              |              |              |              |
| ARGOX              | <b>0.964</b>         | 0.944           | <b>0.896</b> | <b>0.924</b> | <b>0.926</b> | <b>0.976</b> | <b>0.987</b> | <b>0.903</b> |
| VAR                | 0.907                | 0.826           | 0.638        | 0.835        | 0.766        | 0.911        | 0.926        | 0.888        |
| GFT                | –                    | –               | 0.896        | –            | –            | –            | –            | –            |
| Lu et al. (2019)   | –                    | <b>0.944</b>    | 0.887        | 0.922        | 0.922        | –            | –            | –            |
| naive              | 0.948                | 0.938           | 0.851        | 0.909        | 0.917        | 0.930        | 0.940        | 0.894        |

**Table S34.** Comparison of different methods for state-level %ILI estimation in New Jersey (NJ). The MSE, MAE, and correlation are reported. The method with the best performance is highlighted in boldface for each metric in each period.

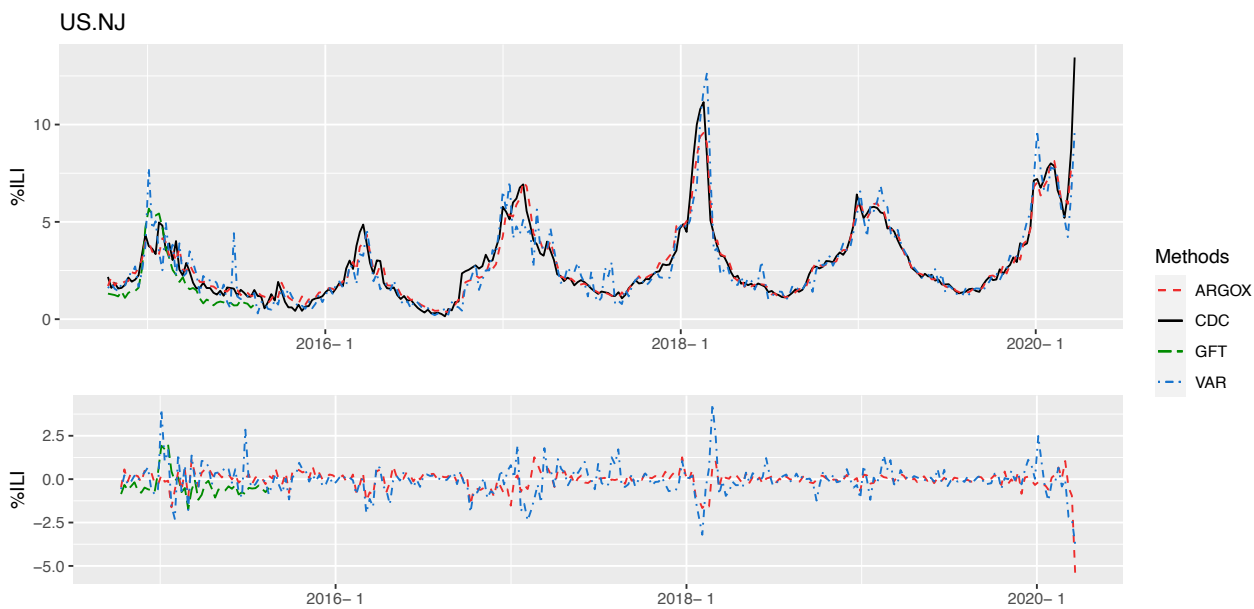

**Figure S30.** Plots of the %ILI estimates (top) and the estimation errors (bottom) for New Jersey (NJ).

|                    | Whole period '14-'20 | Overall '14-'17 | '14-'15      | '15-'16      | '16-'17      | '17-'18      | '18-'19      | '19-'20      |
|--------------------|----------------------|-----------------|--------------|--------------|--------------|--------------|--------------|--------------|
| <b>MSE</b>         |                      |                 |              |              |              |              |              |              |
| ARGOX              | <b>0.263</b>         | <b>0.146</b>    | <b>0.193</b> | <b>0.180</b> | 0.100        | <b>0.487</b> | <b>0.315</b> | <b>1.031</b> |
| VAR                | 0.598                | 0.477           | 0.700        | 0.401        | 0.519        | 0.751        | 0.825        | 1.958        |
| GFT                | –                    | –               | 1.944        | –            | –            | –            | –            | –            |
| Lu et al. (2019)   | –                    | 0.164           | 0.293        | 0.213        | <b>0.093</b> | –            | –            | –            |
| naive              | 0.417                | 0.247           | 0.399        | 0.234        | 0.167        | 0.807        | 0.560        | 1.499        |
| <b>MAE</b>         |                      |                 |              |              |              |              |              |              |
| ARGOX              | <b>0.325</b>         | <b>0.274</b>    | <b>0.299</b> | <b>0.321</b> | <b>0.241</b> | <b>0.401</b> | <b>0.358</b> | <b>0.785</b> |
| VAR                | 0.478                | 0.454           | 0.475        | 0.487        | 0.516        | 0.538        | 0.611        | 0.928        |
| GFT                | –                    | –               | 1.222        | –            | –            | –            | –            | –            |
| Lu et al. (2019)   | –                    | –               | –            | –            | –            | –            | –            | –            |
| naive              | 0.389                | 0.329           | 0.368        | 0.368        | 0.310        | 0.580        | 0.501        | 0.806        |
| <b>Correlation</b> |                      |                 |              |              |              |              |              |              |
| ARGOX              | <b>0.966</b>         | <b>0.948</b>    | 0.945        | <b>0.935</b> | 0.962        | <b>0.957</b> | <b>0.959</b> | <b>0.946</b> |
| VAR                | 0.926                | 0.871           | 0.895        | 0.843        | 0.845        | 0.942        | 0.888        | 0.903        |
| GFT                | –                    | –               | <b>0.951</b> | –            | –            | –            | –            | –            |
| Lu et al. (2019)   | –                    | 0.943           | 0.923        | 0.927        | <b>0.966</b> | –            | –            | –            |
| naive              | 0.946                | 0.912           | 0.881        | 0.916        | 0.935        | 0.926        | 0.924        | 0.925        |

**Table S35.** Comparison of different methods for state-level %ILI estimation in New Mexico (NM). The MSE, MAE, and correlation are reported. The method with the best performance is highlighted in boldface for each metric in each period.

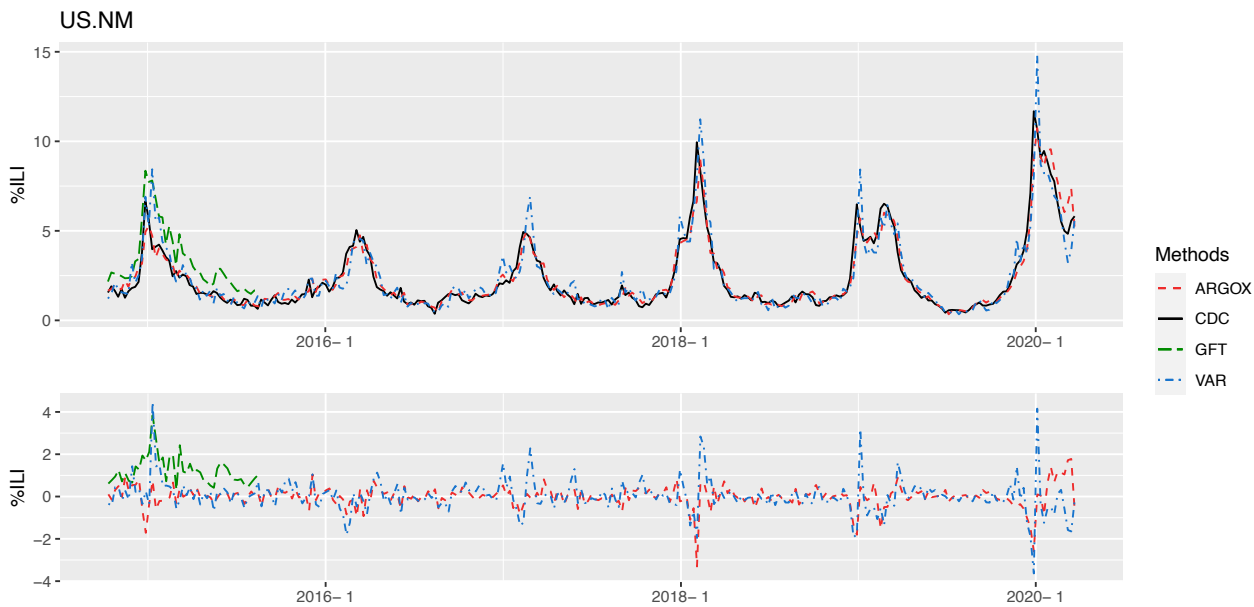

**Figure S31.** Plots of the %ILI estimates (top) and the estimation errors (bottom) for New Mexico (NM).

|                    | Whole period '14-'20 | Overall '14-'17 | '14-'15      | '15-'16      | '16-'17      | '17-'18      | '18-'19      | '19-'20      |
|--------------------|----------------------|-----------------|--------------|--------------|--------------|--------------|--------------|--------------|
| <b>MSE</b>         |                      |                 |              |              |              |              |              |              |
| ARGOX              | <b>0.363</b>         | <b>0.469</b>    | 0.425        | <b>0.254</b> | <b>1.028</b> | <b>0.532</b> | <b>0.080</b> | <b>0.668</b> |
| VAR                | 1.863                | 2.812           | 0.792        | 0.522        | 9.831        | 1.794        | 0.431        | 2.434        |
| GFT                | –                    | –               | 0.686        | –            | –            | –            | –            | –            |
| Lu et al. (2019)   | –                    | 1.228           | <b>0.349</b> | 0.461        | 3.932        | –            | –            | –            |
| naive              | 0.501                | 0.577           | 0.631        | 0.336        | 1.124        | 0.956        | 0.143        | 1.026        |
| <b>MAE</b>         |                      |                 |              |              |              |              |              |              |
| ARGOX              | <b>0.395</b>         | <b>0.482</b>    | <b>0.480</b> | <b>0.393</b> | 0.755        | <b>0.524</b> | <b>0.212</b> | <b>0.556</b> |
| VAR                | 0.690                | 0.755           | 0.594        | 0.544        | 1.581        | 0.952        | 0.486        | 1.003        |
| GFT                | –                    | –               | 0.630        | –            | –            | –            | –            | –            |
| Lu et al. (2019)   | –                    | –               | –            | –            | –            | –            | –            | –            |
| naive              | 0.426                | 0.489           | 0.514        | 0.432        | <b>0.732</b> | 0.648        | 0.291        | 0.735        |
| <b>Correlation</b> |                      |                 |              |              |              |              |              |              |
| ARGOX              | <b>0.959</b>         | <b>0.939</b>    | 0.925        | <b>0.837</b> | <b>0.925</b> | <b>0.970</b> | <b>0.965</b> | <b>0.939</b> |
| VAR                | 0.849                | 0.769           | 0.859        | 0.756        | 0.676        | 0.921        | 0.817        | 0.856        |
| GFT                | –                    | –               | 0.903        | –            | –            | –            | –            | –            |
| Lu et al. (2019)   | –                    | 0.856           | <b>0.948</b> | 0.751        | 0.782        | –            | –            | –            |
| naive              | 0.943                | 0.926           | 0.890        | 0.794        | 0.915        | 0.943        | 0.940        | 0.904        |

**Table S36.** Comparison of different methods for state-level %ILI estimation in New York (NY). The MSE, MAE, and correlation are reported. The method with the best performance is highlighted in boldface for each metric in each period.

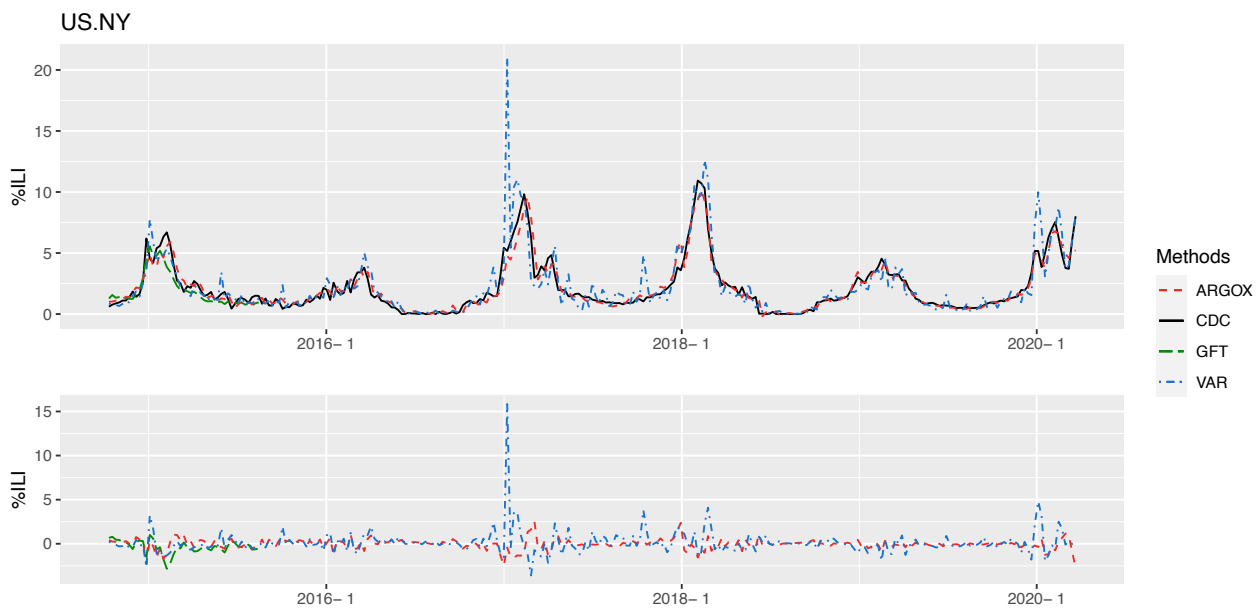

**Figure S32.** Plots of the %ILI estimates (top) and the estimation errors (bottom) for New York (NY).

|                    | Whole period '14-'20 | Overall '14-'17 | '14-'15      | '15-'16      | '16-'17      | '17-'18      | '18-'19      | '19-'20      |
|--------------------|----------------------|-----------------|--------------|--------------|--------------|--------------|--------------|--------------|
| <b>MSE</b>         |                      |                 |              |              |              |              |              |              |
| ARGOX              | <b>0.246</b>         | 0.298           | 0.446        | <b>0.129</b> | <b>0.449</b> | <b>0.566</b> | <b>0.129</b> | <b>0.134</b> |
| VAR                | 1.006                | 1.072           | 2.404        | 0.297        | 0.740        | 2.260        | 1.597        | 0.279        |
| GFT                | –                    | –               | 0.374        | –            | –            | –            | –            | –            |
| Lu et al. (2019)   | –                    | <b>0.293</b>    | <b>0.309</b> | 0.297        | 0.554        | –            | –            | –            |
| naive              | 0.477                | 0.576           | 0.935        | 0.208        | 0.841        | 1.102        | 0.293        | 0.333        |
| <b>MAE</b>         |                      |                 |              |              |              |              |              |              |
| ARGOX              | <b>0.303</b>         | <b>0.345</b>    | <b>0.395</b> | <b>0.279</b> | <b>0.453</b> | <b>0.480</b> | <b>0.236</b> | <b>0.247</b> |
| VAR                | 0.547                | 0.607           | 0.887        | 0.456        | 0.625        | 0.927        | 0.617        | 0.422        |
| GFT                | –                    | –               | 0.420        | –            | –            | –            | –            | –            |
| Lu et al. (2019)   | –                    | –               | –            | –            | –            | –            | –            | –            |
| naive              | 0.408                | 0.446           | 0.474        | 0.348        | 0.680        | 0.707        | 0.374        | 0.431        |
| <b>Correlation</b> |                      |                 |              |              |              |              |              |              |
| ARGOX              | <b>0.962</b>         | <b>0.943</b>    | 0.938        | <b>0.925</b> | <b>0.937</b> | <b>0.956</b> | <b>0.977</b> | <b>0.974</b> |
| VAR                | 0.874                | 0.769           | 0.569        | 0.831        | 0.890        | 0.954        | 0.911        | 0.957        |
| GFT                | –                    | –               | <b>0.975</b> | –            | –            | –            | –            | –            |
| Lu et al. (2019)   | –                    | 0.942           | 0.958        | 0.890        | 0.919        | –            | –            | –            |
| naive              | 0.925                | 0.887           | 0.860        | 0.881        | 0.881        | 0.910        | 0.940        | 0.941        |

**Table S37.** Comparison of different methods for state-level %ILI estimation in North Carolina (NC). The MSE, MAE, and correlation are reported. The method with the best performance is highlighted in boldface for each metric in each period.

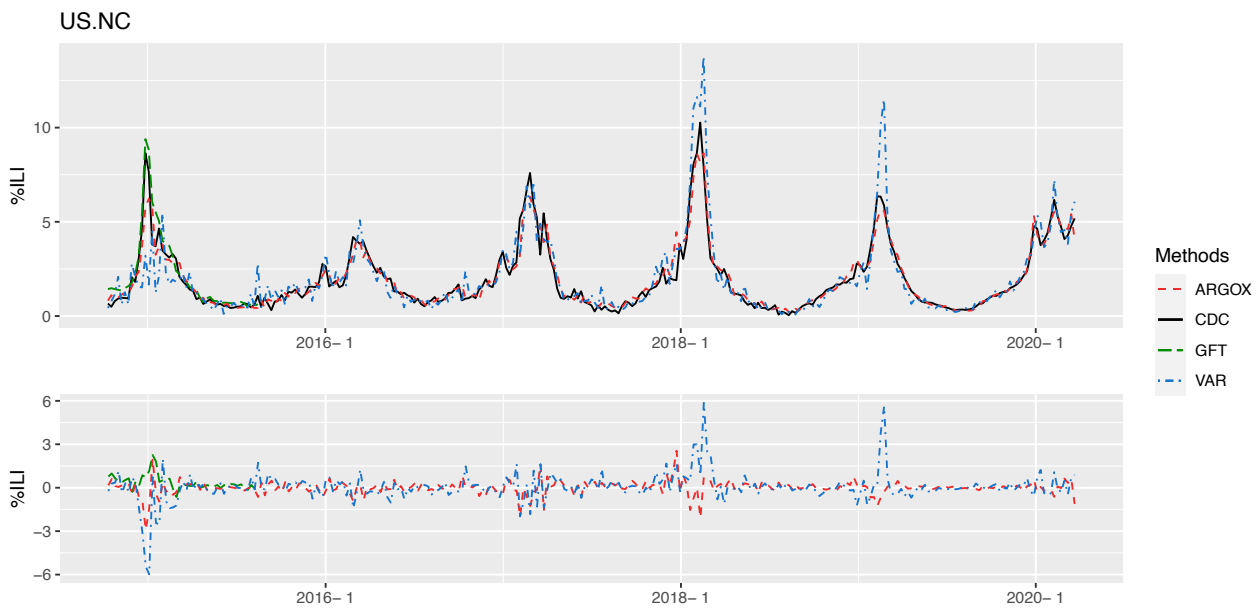

**Figure S33.** Plots of the %ILI estimates (top) and the estimation errors (bottom) for North Carolina (NC).

|                    | Whole period '14-'20 | Overall '14-'17 | '14-'15      | '15-'16      | '16-'17      | '17-'18      | '18-'19      | '19-'20      |
|--------------------|----------------------|-----------------|--------------|--------------|--------------|--------------|--------------|--------------|
| <b>MSE</b>         |                      |                 |              |              |              |              |              |              |
| ARGOX              | <b>0.634</b>         | <b>0.578</b>    | <b>0.717</b> | <b>0.185</b> | 1.197        | <b>0.604</b> | <b>0.440</b> | <b>2.297</b> |
| VAR                | 3.213                | 1.877           | 2.947        | 0.544        | 3.125        | 5.011        | 1.006        | 8.291        |
| GFT                | –                    | –               | 0.938        | –            | –            | –            | –            | –            |
| Lu et al. (2019)   | –                    | 0.806           | 1.496        | 0.230        | <b>0.927</b> | –            | –            | –            |
| naive              | 0.816                | 0.776           | 0.819        | 0.245        | 1.802        | 0.992        | 0.618        | 2.408        |
| <b>MAE</b>         |                      |                 |              |              |              |              |              |              |
| ARGOX              | <b>0.495</b>         | <b>0.438</b>    | <b>0.454</b> | <b>0.351</b> | <b>0.761</b> | <b>0.609</b> | <b>0.491</b> | <b>1.121</b> |
| VAR                | 0.874                | 0.724           | 0.923        | 0.521        | 1.080        | 1.165        | 0.796        | 1.894        |
| GFT                | –                    | –               | 0.669        | –            | –            | –            | –            | –            |
| Lu et al. (2019)   | –                    | –               | –            | –            | –            | –            | –            | –            |
| naive              | 0.567                | 0.499           | 0.495        | 0.405        | 0.899        | 0.735        | 0.607        | 1.210        |
| <b>Correlation</b> |                      |                 |              |              |              |              |              |              |
| ARGOX              | <b>0.876</b>         | <b>0.839</b>    | 0.879        | <b>0.735</b> | 0.673        | <b>0.846</b> | <b>0.867</b> | <b>0.778</b> |
| VAR                | 0.671                | 0.799           | <b>0.917</b> | 0.545        | 0.479        | 0.612        | 0.696        | 0.516        |
| GFT                | –                    | –               | 0.847        | –            | –            | –            | –            | –            |
| Lu et al. (2019)   | –                    | 0.809           | 0.808        | 0.658        | <b>0.761</b> | –            | –            | –            |
| naive              | 0.846                | 0.800           | 0.869        | 0.687        | 0.575        | 0.740        | 0.808        | 0.769        |

**Table S38.** Comparison of different methods for state-level %ILI estimation in North Dakota (ND). The MSE, MAE, and correlation are reported. The method with the best performance is highlighted in boldface for each metric in each period.

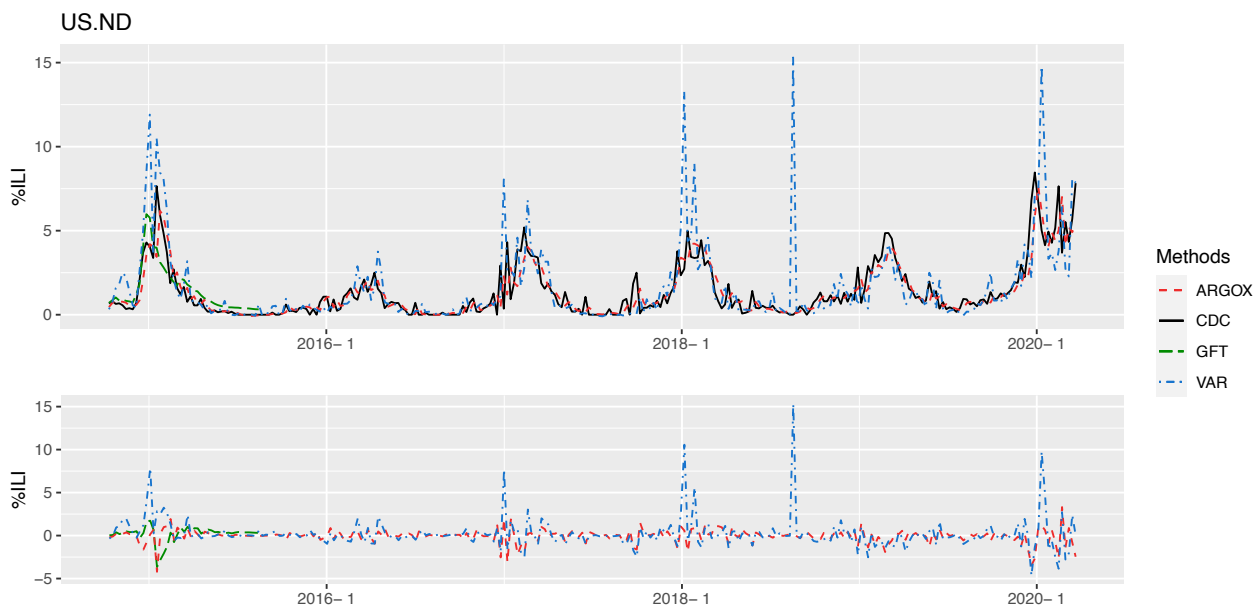

**Figure S34.** Plots of the %ILI estimates (top) and the estimation errors (bottom) for North Dakota (ND).

|                    | Whole period '14-'20 | Overall '14-'17 | '14-'15      | '15-'16      | '16-'17      | '17-'18      | '18-'19      | '19-'20      |
|--------------------|----------------------|-----------------|--------------|--------------|--------------|--------------|--------------|--------------|
| <b>MSE</b>         |                      |                 |              |              |              |              |              |              |
| ARGOX              | <b>0.108</b>         | 0.121           | 0.291        | <b>0.032</b> | <b>0.057</b> | <b>0.127</b> | <b>0.108</b> | <b>0.232</b> |
| VAR                | 0.248                | 0.312           | 0.784        | 0.063        | 0.119        | 0.232        | 0.110        | 0.596        |
| GFT                | –                    | –               | 0.819        | –            | –            | –            | –            | –            |
| Lu et al. (2019)   | –                    | <b>0.094</b>    | <b>0.236</b> | 0.042        | 0.095        | –            | –            | –            |
| naïve              | 0.181                | 0.224           | 0.547        | 0.065        | 0.104        | 0.270        | 0.144        | 0.269        |
| <b>MAE</b>         |                      |                 |              |              |              |              |              |              |
| ARGOX              | <b>0.193</b>         | <b>0.179</b>    | <b>0.248</b> | <b>0.136</b> | <b>0.177</b> | <b>0.253</b> | 0.240        | <b>0.342</b> |
| VAR                | 0.280                | 0.280           | 0.436        | 0.203        | 0.237        | 0.344        | <b>0.233</b> | 0.554        |
| GFT                | –                    | –               | 0.719        | –            | –            | –            | –            | –            |
| Lu et al. (2019)   | –                    | –               | –            | –            | –            | –            | –            | –            |
| naïve              | 0.234                | 0.230           | 0.355        | 0.192        | 0.225        | 0.334        | 0.268        | 0.383        |
| <b>Correlation</b> |                      |                 |              |              |              |              |              |              |
| ARGOX              | <b>0.943</b>         | 0.928           | 0.911        | <b>0.915</b> | <b>0.958</b> | <b>0.959</b> | 0.890        | <b>0.922</b> |
| VAR                | 0.885                | 0.846           | 0.835        | 0.829        | 0.919        | 0.957        | <b>0.905</b> | 0.784        |
| GFT                | –                    | –               | <b>0.971</b> | –            | –            | –            | –            | –            |
| Lu et al. (2019)   | –                    | <b>0.943</b>    | 0.941        | 0.897        | 0.932        | –            | –            | –            |
| naïve              | 0.906                | 0.869           | 0.833        | 0.835        | 0.922        | 0.912        | 0.860        | 0.915        |

**Table S39.** Comparison of different methods for state-level %ILI estimation in Ohio (OH). The MSE, MAE, and correlation are reported. The method with the best performance is highlighted in boldface for each metric in each period.

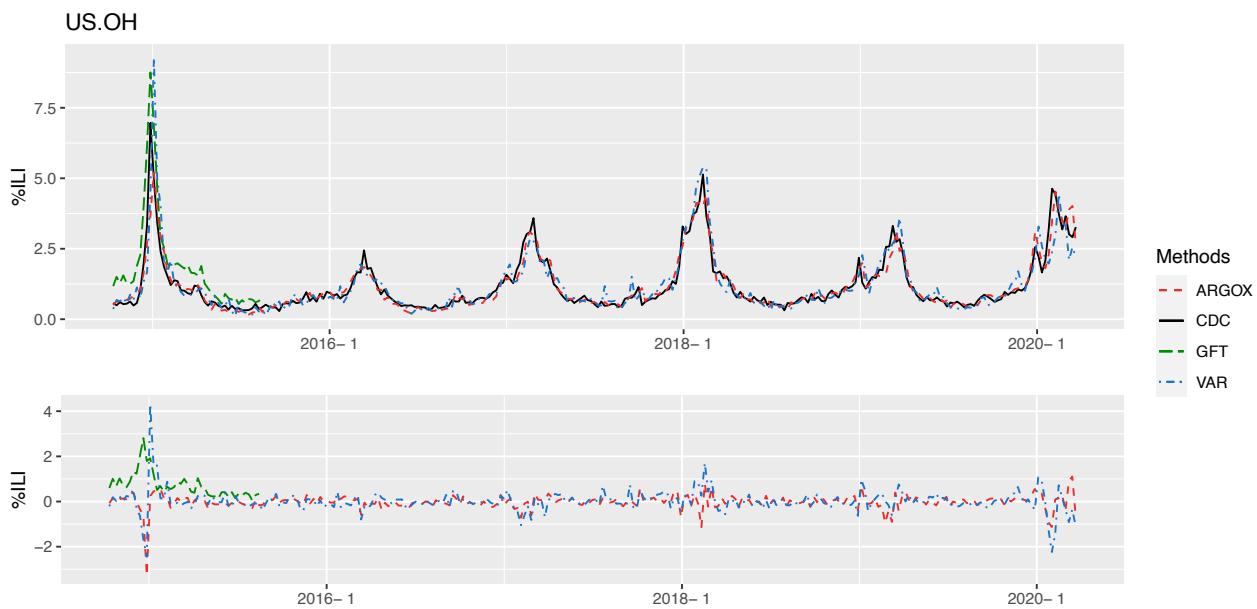

**Figure S35.** Plots of the %ILI estimates (top) and the estimation errors (bottom) for Ohio (OH).

|                    | Whole period '14-'20 | Overall '14-'17 | '14-'15      | '15-'16      | '16-'17      | '17-'18      | '18-'19      | '19-'20      |
|--------------------|----------------------|-----------------|--------------|--------------|--------------|--------------|--------------|--------------|
| <b>MSE</b>         |                      |                 |              |              |              |              |              |              |
| ARGOX              | <b>0.859</b>         | 1.360           | 2.003        | <b>0.726</b> | <b>2.002</b> | <b>0.554</b> | <b>0.539</b> | <b>0.701</b> |
| VAR                | 8.691                | 4.993           | 3.314        | 2.556        | 13.327       | 5.961        | 9.482        | 52.931       |
| GFT                | –                    | –               | 3.906        | –            | –            | –            | –            | –            |
| Lu et al. (2019)   | –                    | –               | –            | –            | –            | –            | –            | –            |
| naive              | 0.965                | <b>1.291</b>    | <b>1.692</b> | 0.786        | 2.124        | 1.000        | 0.988        | 1.063        |
| <b>MAE</b>         |                      |                 |              |              |              |              |              |              |
| ARGOX              | <b>0.586</b>         | 0.788           | 0.924        | <b>0.695</b> | <b>1.052</b> | <b>0.516</b> | <b>0.501</b> | <b>0.573</b> |
| VAR                | 1.415                | 1.282           | 1.186        | 1.253        | 2.139        | 1.349        | 1.956        | 4.176        |
| GFT                | –                    | –               | 1.390        | –            | –            | –            | –            | –            |
| Lu et al. (2019)   | –                    | –               | –            | –            | –            | –            | –            | –            |
| naive              | 0.646                | <b>0.775</b>    | <b>0.889</b> | 0.716        | 1.091        | 0.745        | 0.706        | 0.742        |
| <b>Correlation</b> |                      |                 |              |              |              |              |              |              |
| ARGOX              | <b>0.956</b>         | 0.933           | 0.917        | 0.532        | <b>0.935</b> | <b>0.980</b> | <b>0.971</b> | <b>0.959</b> |
| VAR                | 0.808                | 0.803           | 0.858        | 0.493        | 0.761        | 0.914        | 0.890        | 0.610        |
| GFT                | –                    | –               | 0.856        | –            | –            | –            | –            | –            |
| Lu et al. (2019)   | –                    | –               | –            | –            | –            | –            | –            | –            |
| naive              | 0.951                | <b>0.938</b>    | <b>0.930</b> | <b>0.535</b> | 0.931        | 0.943        | 0.940        | 0.943        |

**Table S40.** Comparison of different methods for state-level %ILI estimation in Oklahoma (OK). The MSE, MAE, and correlation are reported. The method with the best performance is highlighted in boldface for each metric in each period.

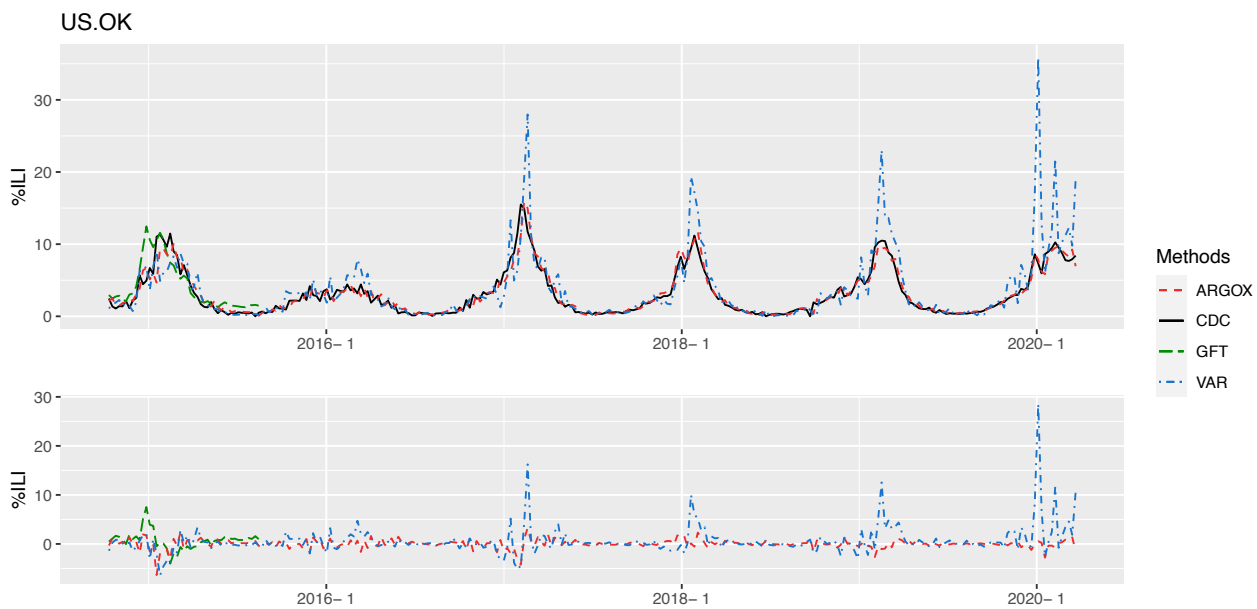

**Figure S36.** Plots of the %ILI estimates (top) and the estimation errors (bottom) for Oklahoma (OK).



|                    | Whole period '14-'20 | Overall '14-'17 | '14-'15      | '15-'16      | '16-'17      | '17-'18      | '18-'19      | '19-'20      |
|--------------------|----------------------|-----------------|--------------|--------------|--------------|--------------|--------------|--------------|
| <b>MSE</b>         |                      |                 |              |              |              |              |              |              |
| ARGOX              | <b>0.187</b>         | <b>0.286</b>    | 0.123        | 0.358        | <b>0.624</b> | <b>0.062</b> | <b>0.157</b> | <b>0.240</b> |
| VAR                | 1.188                | 0.616           | 0.281        | 0.559        | 1.463        | 6.474        | 0.349        | 0.717        |
| GFT                | –                    | –               | 0.372        | –            | –            | –            | –            | –            |
| Lu et al. (2019)   | –                    | 0.408           | 0.253        | <b>0.350</b> | 0.869        | –            | –            | –            |
| naive              | 0.260                | 0.352           | <b>0.094</b> | 0.400        | 0.894        | 0.190        | 0.203        | 0.470        |
| <b>MAE</b>         |                      |                 |              |              |              |              |              |              |
| ARGOX              | <b>0.264</b>         | <b>0.327</b>    | 0.254        | 0.435        | <b>0.457</b> | <b>0.187</b> | <b>0.273</b> | <b>0.364</b> |
| VAR                | 0.522                | 0.480           | 0.356        | 0.598        | 0.716        | 1.156        | 0.436        | 0.636        |
| GFT                | –                    | –               | 0.516        | –            | –            | –            | –            | –            |
| Lu et al. (2019)   | –                    | –               | –            | –            | –            | –            | –            | –            |
| naive              | 0.300                | 0.341           | <b>0.237</b> | <b>0.428</b> | 0.560        | 0.310        | 0.275        | 0.534        |
| <b>Correlation</b> |                      |                 |              |              |              |              |              |              |
| ARGOX              | <b>0.945</b>         | <b>0.856</b>    | 0.803        | 0.715        | <b>0.796</b> | <b>0.988</b> | <b>0.941</b> | <b>0.958</b> |
| VAR                | 0.794                | 0.739           | 0.745        | 0.591        | 0.702        | 0.825        | 0.878        | 0.872        |
| GFT                | –                    | –               | 0.739        | –            | –            | –            | –            | –            |
| Lu et al. (2019)   | –                    | 0.802           | 0.779        | <b>0.750</b> | 0.745        | –            | –            | –            |
| naive              | 0.924                | 0.832           | <b>0.829</b> | 0.713        | 0.728        | 0.952        | 0.919        | 0.920        |

**Table S41.** Comparison of different methods for state-level %ILI estimation in Oregon (OR). The MSE, MAE, and correlation are reported. The method with the best performance is highlighted in boldface for each metric in each period.

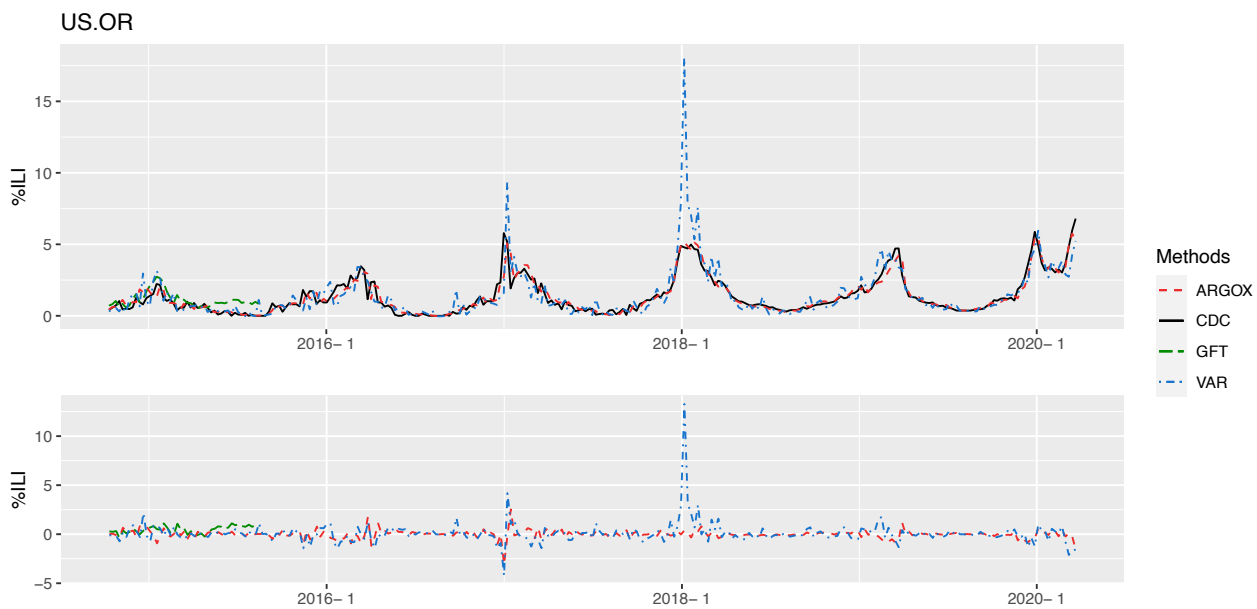

**Figure S37.** Plots of the %ILI estimates (top) and the estimation errors (bottom) for Oregon (OR).

|                    | Whole period '14-'20 | Overall '14-'17 | '14-'15      | '15-'16      | '16-'17      | '17-'18      | '18-'19      | '19-'20      |
|--------------------|----------------------|-----------------|--------------|--------------|--------------|--------------|--------------|--------------|
| <b>MSE</b>         |                      |                 |              |              |              |              |              |              |
| ARGOX              | <b>0.124</b>         | 0.157           | 0.236        | <b>0.092</b> | <b>0.202</b> | <b>0.165</b> | <b>0.035</b> | <b>0.274</b> |
| VAR                | 0.311                | 0.511           | 1.013        | 0.224        | 0.446        | 0.167        | 0.106        | 0.342        |
| GFT                | –                    | –               | 0.329        | –            | –            | –            | –            | –            |
| Lu et al. (2019)   | –                    | <b>0.138</b>    | <b>0.214</b> | 0.110        | 0.218        | –            | –            | –            |
| naive              | 0.227                | 0.307           | 0.523        | 0.206        | 0.318        | 0.319        | 0.082        | 0.357        |
| <b>MAE</b>         |                      |                 |              |              |              |              |              |              |
| ARGOX              | <b>0.215</b>         | <b>0.266</b>    | <b>0.314</b> | <b>0.224</b> | <b>0.325</b> | <b>0.231</b> | <b>0.149</b> | <b>0.305</b> |
| VAR                | 0.322                | 0.420           | 0.561        | 0.324        | 0.473        | 0.302        | 0.230        | 0.421        |
| GFT                | –                    | –               | 0.473        | –            | –            | –            | –            | –            |
| Lu et al. (2019)   | –                    | –               | –            | –            | –            | –            | –            | –            |
| naive              | 0.295                | 0.361           | 0.467        | 0.336        | 0.396        | 0.358        | 0.212        | 0.440        |
| <b>Correlation</b> |                      |                 |              |              |              |              |              |              |
| ARGOX              | <b>0.967</b>         | 0.947           | 0.954        | 0.899        | 0.934        | <b>0.978</b> | <b>0.977</b> | <b>0.950</b> |
| VAR                | 0.925                | 0.871           | 0.866        | 0.810        | 0.866        | 0.973        | 0.934        | 0.935        |
| GFT                | –                    | –               | 0.950        | –            | –            | –            | –            | –            |
| Lu et al. (2019)   | –                    | <b>0.954</b>    | <b>0.963</b> | <b>0.905</b> | <b>0.935</b> | –            | –            | –            |
| naive              | 0.938                | 0.898           | 0.889        | 0.793        | 0.900        | 0.945        | 0.943        | 0.938        |

**Table S42.** Comparison of different methods for state-level %ILI estimation in Pennsylvania (PA). The MSE, MAE, and correlation are reported. The method with the best performance is highlighted in boldface for each metric in each period.

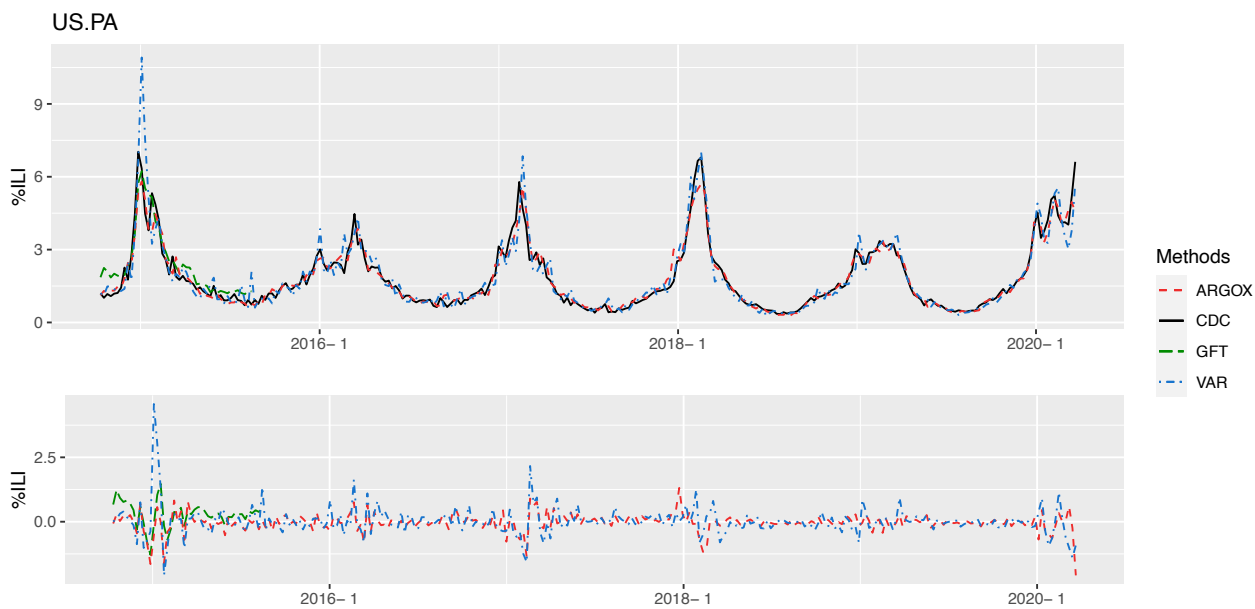

**Figure S38.** Plots of the %ILI estimates (top) and the estimation errors (bottom) for Pennsylvania (PA).

|                    | Whole period '14-'20 | Overall '14-'17 | '14-'15      | '15-'16      | '16-'17      | '17-'18      | '18-'19      | '19-'20      |
|--------------------|----------------------|-----------------|--------------|--------------|--------------|--------------|--------------|--------------|
| <b>MSE</b>         |                      |                 |              |              |              |              |              |              |
| ARGOX              | <b>0.235</b>         | 0.144           | 0.194        | 0.056        | 0.212        | <b>0.390</b> | <b>0.283</b> | <b>0.998</b> |
| VAR                | 0.858                | 0.272           | 0.349        | 0.129        | 0.423        | 2.802        | 2.542        | 1.130        |
| GFT                | –                    | –               | 0.417        | –            | –            | –            | –            | –            |
| Lu et al. (2019)   | –                    | <b>0.067</b>    | <b>0.117</b> | <b>0.025</b> | <b>0.018</b> | –            | –            | –            |
| naive              | 0.307                | 0.166           | 0.201        | 0.057        | 0.294        | 0.661        | 0.428        | 1.150        |
| <b>MAE</b>         |                      |                 |              |              |              |              |              |              |
| ARGOX              | <b>0.276</b>         | <b>0.223</b>    | <b>0.243</b> | 0.178        | <b>0.314</b> | <b>0.438</b> | <b>0.368</b> | <b>0.682</b> |
| VAR                | 0.433                | 0.313           | 0.313        | 0.248        | 0.494        | 0.818        | 0.894        | 0.737        |
| GFT                | –                    | –               | 0.565        | –            | –            | –            | –            | –            |
| Lu et al. (2019)   | –                    | –               | –            | –            | –            | –            | –            | –            |
| naive              | 0.314                | 0.232           | 0.257        | <b>0.153</b> | 0.365        | 0.564        | 0.490        | 0.750        |
| <b>Correlation</b> |                      |                 |              |              |              |              |              |              |
| ARGOX              | <b>0.961</b>         | 0.932           | 0.923        | 0.905        | <b>0.940</b> | <b>0.954</b> | <b>0.959</b> | 0.942        |
| VAR                | 0.901                | 0.882           | 0.862        | 0.858        | 0.880        | 0.873        | 0.752        | <b>0.952</b> |
| GFT                | –                    | –               | 0.944        | –            | –            | –            | –            | –            |
| Lu et al. (2019)   | –                    | <b>0.949</b>    | <b>0.956</b> | <b>0.961</b> | 0.047        | –            | –            | –            |
| naive              | 0.949                | 0.919           | 0.916        | 0.907        | 0.904        | 0.918        | 0.936        | 0.936        |

**Table S43.** Comparison of different methods for state-level %ILI estimation in Rhode Island (RI). The MSE, MAE, and correlation are reported. The method with the best performance is highlighted in boldface for each metric in each period.

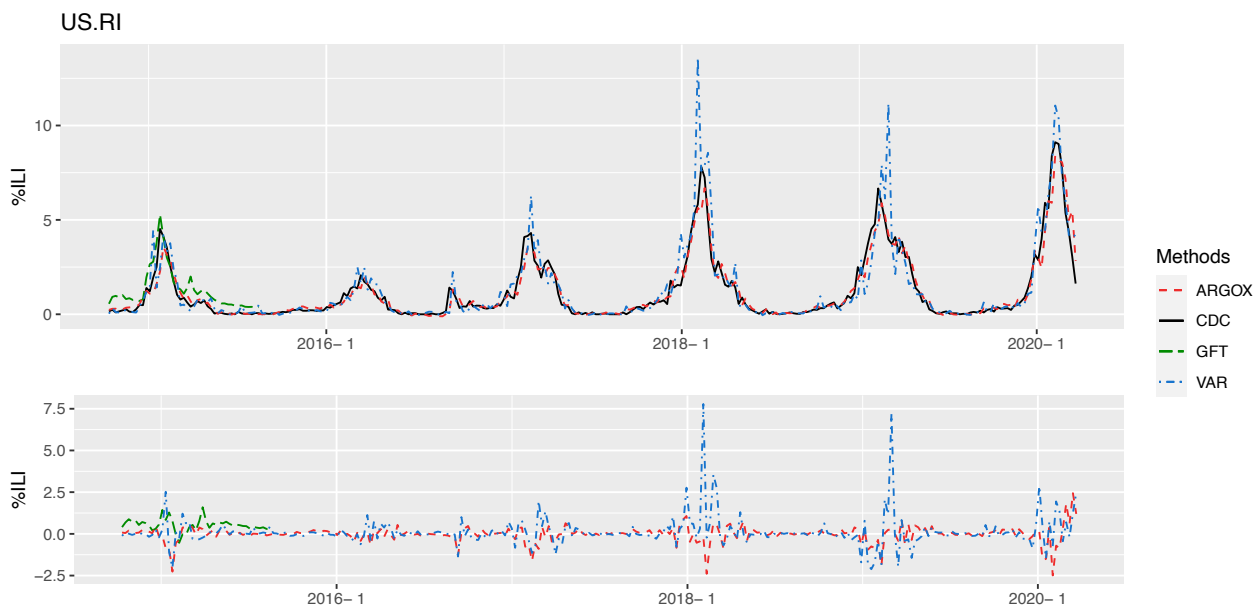

**Figure S39.** Plots of the %ILI estimates (top) and the estimation errors (bottom) for Rhode Island (RI).

|                    | Whole period '14-'20 | Overall '14-'17 | '14-'15      | '15-'16      | '16-'17      | '17-'18      | '18-'19      | '19-'20      |
|--------------------|----------------------|-----------------|--------------|--------------|--------------|--------------|--------------|--------------|
| <b>MSE</b>         |                      |                 |              |              |              |              |              |              |
| ARGOX              | <b>0.351</b>         | <b>0.336</b>    | 0.317        | <b>0.097</b> | <b>0.864</b> | <b>0.472</b> | <b>0.427</b> | <b>0.835</b> |
| VAR                | 1.932                | 0.912           | 0.963        | 0.342        | 2.115        | 8.423        | 1.260        | 3.850        |
| GFT                | –                    | –               | 2.269        | –            | –            | –            | –            | –            |
| Lu et al. (2019)   | –                    | 0.383           | <b>0.130</b> | 0.452        | 0.955        | –            | –            | –            |
| naive              | 0.767                | 0.465           | 0.565        | 0.141        | 1.013        | 1.790        | 0.871        | 2.547        |
| <b>MAE</b>         |                      |                 |              |              |              |              |              |              |
| ARGOX              | <b>0.367</b>         | <b>0.348</b>    | <b>0.285</b> | <b>0.234</b> | <b>0.759</b> | <b>0.455</b> | <b>0.432</b> | <b>0.726</b> |
| VAR                | 0.687                | 0.531           | 0.436        | 0.459        | 1.085        | 1.772        | 0.741        | 1.029        |
| GFT                | –                    | –               | 1.235        | –            | –            | –            | –            | –            |
| Lu et al. (2019)   | –                    | –               | –            | –            | –            | –            | –            | –            |
| naive              | 0.516                | 0.403           | 0.387        | 0.292        | 0.795        | 0.880        | 0.683        | 1.172        |
| <b>Correlation</b> |                      |                 |              |              |              |              |              |              |
| ARGOX              | <b>0.979</b>         | <b>0.953</b>    | 0.925        | <b>0.873</b> | 0.909        | <b>0.985</b> | <b>0.963</b> | <b>0.956</b> |
| VAR                | 0.906                | 0.882           | 0.816        | 0.574        | 0.811        | 0.754        | 0.922        | 0.918        |
| GFT                | –                    | –               | 0.978        | –            | –            | –            | –            | –            |
| Lu et al. (2019)   | –                    | 0.951           | <b>0.983</b> | 0.639        | <b>0.918</b> | –            | –            | –            |
| naive              | 0.954                | 0.934           | 0.860        | 0.823        | 0.888        | 0.941        | 0.915        | 0.874        |

**Table S44.** Comparison of different methods for state-level %ILI estimation in South Carolina (SC). The MSE, MAE, and correlation are reported. The method with the best performance is highlighted in boldface for each metric in each period.

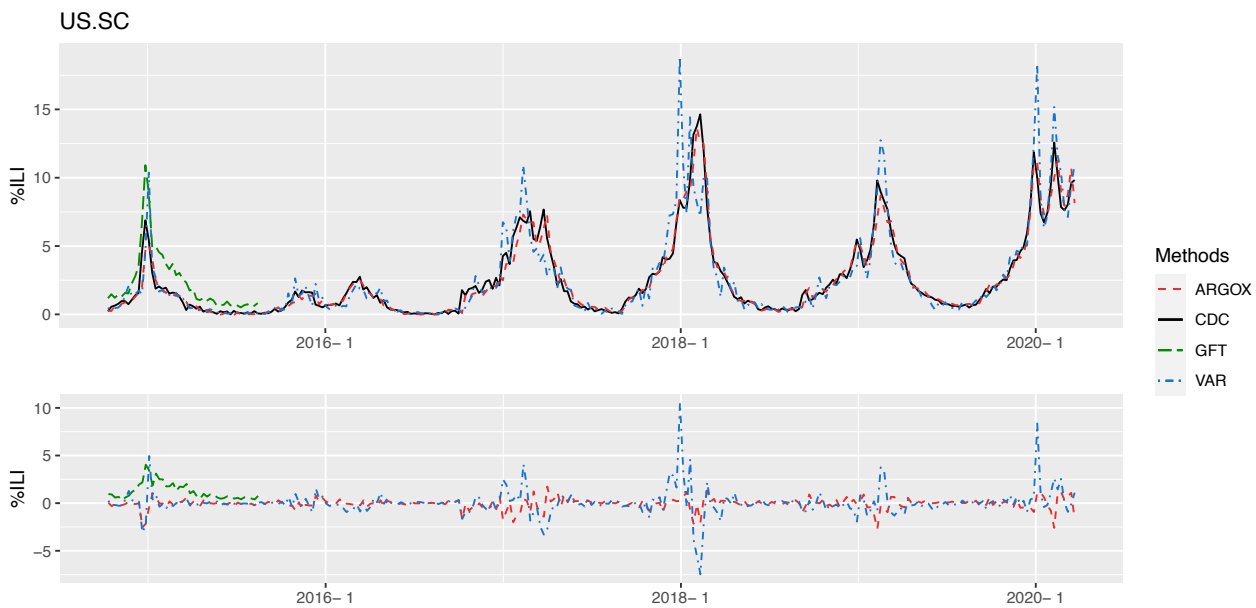

**Figure S40.** Plots of the %ILI estimates (top) and the estimation errors (bottom) for South Carolina (SC).

|                    | Whole period '14-'20 | Overall '14-'17 | '14-'15      | '15-'16      | '16-'17      | '17-'18      | '18-'19      | '19-'20      |
|--------------------|----------------------|-----------------|--------------|--------------|--------------|--------------|--------------|--------------|
| <b>MSE</b>         |                      |                 |              |              |              |              |              |              |
| ARGOX              | <b>0.104</b>         | 0.099           | <b>0.087</b> | <b>0.087</b> | 0.166        | <b>0.224</b> | <b>0.126</b> | <b>0.081</b> |
| VAR                | 0.331                | 0.372           | 0.363        | 0.371        | 0.594        | 0.250        | 0.228        | 0.992        |
| GFT                | –                    | –               | 0.953        | –            | –            | –            | –            | –            |
| Lu et al. (2019)   | –                    | <b>0.082</b>    | 0.093        | 0.109        | <b>0.102</b> | –            | –            | –            |
| naive              | 0.124                | 0.117           | 0.117        | 0.095        | 0.182        | 0.285        | 0.141        | 0.095        |
| <b>MAE</b>         |                      |                 |              |              |              |              |              |              |
| ARGOX              | <b>0.231</b>         | <b>0.226</b>    | <b>0.215</b> | <b>0.215</b> | <b>0.289</b> | <b>0.347</b> | <b>0.280</b> | <b>0.218</b> |
| VAR                | 0.373                | 0.397           | 0.405        | 0.421        | 0.497        | 0.395        | 0.369        | 0.629        |
| GFT                | –                    | –               | 0.476        | –            | –            | –            | –            | –            |
| Lu et al. (2019)   | –                    | –               | –            | –            | –            | –            | –            | –            |
| naive              | 0.256                | 0.252           | 0.239        | 0.244        | 0.318        | 0.416        | 0.284        | 0.220        |
| <b>Correlation</b> |                      |                 |              |              |              |              |              |              |
| ARGOX              | <b>0.952</b>         | 0.929           | <b>0.932</b> | <b>0.849</b> | 0.929        | <b>0.930</b> | <b>0.884</b> | <b>0.973</b> |
| VAR                | 0.880                | 0.828           | 0.828        | 0.674        | 0.832        | 0.922        | 0.725        | 0.843        |
| GFT                | –                    | –               | 0.906        | –            | –            | –            | –            | –            |
| Lu et al. (2019)   | –                    | <b>0.941</b>    | 0.926        | 0.805        | <b>0.956</b> | –            | –            | –            |
| naive              | 0.943                | 0.918           | 0.907        | 0.840        | 0.924        | 0.908        | 0.844        | 0.970        |

**Table S45.** Comparison of different methods for state-level %ILI estimation in South Dakota (SD). The MSE, MAE, and correlation are reported. The method with the best performance is highlighted in boldface for each metric in each period.

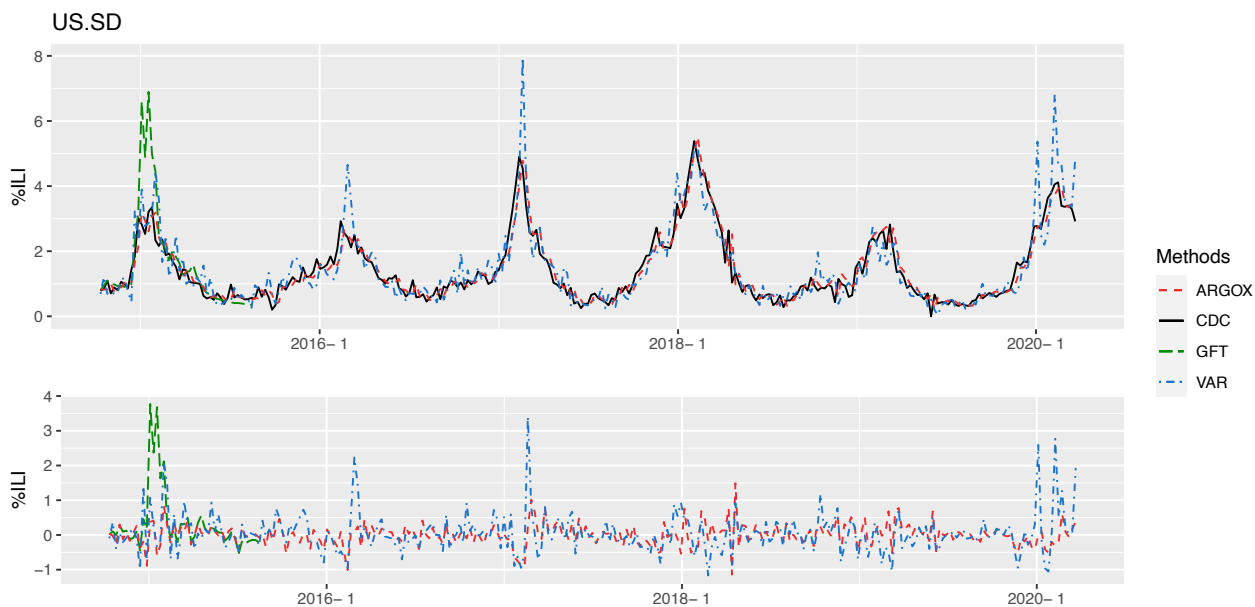

**Figure S41.** Plots of the %ILI estimates (top) and the estimation errors (bottom) for South Dakota (SD).

|                    | Whole period '14-'20 | Overall '14-'17 | '14-'15      | '15-'16      | '16-'17      | '17-'18      | '18-'19      | '19-'20      |
|--------------------|----------------------|-----------------|--------------|--------------|--------------|--------------|--------------|--------------|
| <b>MSE</b>         |                      |                 |              |              |              |              |              |              |
| ARGOX              | <b>0.522</b>         | <b>0.369</b>    | <b>0.321</b> | <b>0.204</b> | 0.740        | <b>1.020</b> | <b>0.239</b> | <b>2.122</b> |
| VAR                | 1.752                | 1.695           | 2.354        | 0.767        | 2.342        | 3.022        | 1.295        | 4.688        |
| GFT                | –                    | –               | 1.407        | –            | –            | –            | –            | –            |
| Lu et al. (2019)   | –                    | 0.391           | 0.440        | 0.282        | <b>0.717</b> | –            | –            | –            |
| naive              | 0.748                | 0.568           | 0.705        | 0.257        | 0.983        | 1.427        | 0.500        | 2.811        |
| <b>MAE</b>         |                      |                 |              |              |              |              |              |              |
| ARGOX              | <b>0.471</b>         | <b>0.435</b>    | <b>0.377</b> | 0.378        | <b>0.644</b> | <b>0.613</b> | <b>0.379</b> | <b>1.138</b> |
| VAR                | 0.726                | 0.776           | 0.729        | 0.633        | 1.079        | 0.787        | 0.713        | 1.469        |
| GFT                | –                    | –               | 0.947        | –            | –            | –            | –            | –            |
| Lu et al. (2019)   | –                    | –               | –            | –            | –            | –            | –            | –            |
| naive              | 0.509                | 0.481           | 0.480        | <b>0.358</b> | 0.711        | 0.711        | 0.522        | 1.142        |
| <b>Correlation</b> |                      |                 |              |              |              |              |              |              |
| ARGOX              | <b>0.950</b>         | <b>0.936</b>    | 0.956        | <b>0.867</b> | 0.864        | <b>0.916</b> | <b>0.941</b> | <b>0.908</b> |
| VAR                | 0.853                | 0.797           | 0.867        | 0.684        | 0.671        | 0.813        | 0.824        | 0.803        |
| GFT                | –                    | –               | <b>0.968</b> | –            | –            | –            | –            | –            |
| Lu et al. (2019)   | –                    | 0.936           | 0.953        | 0.841        | <b>0.890</b> | –            | –            | –            |
| naive              | 0.929                | 0.900           | 0.898        | 0.836        | 0.822        | 0.869        | 0.869        | 0.881        |

**Table S46.** Comparison of different methods for state-level %ILI estimation in Tennessee (TN). The MSE, MAE, and correlation are reported. The method with the best performance is highlighted in boldface for each metric in each period.

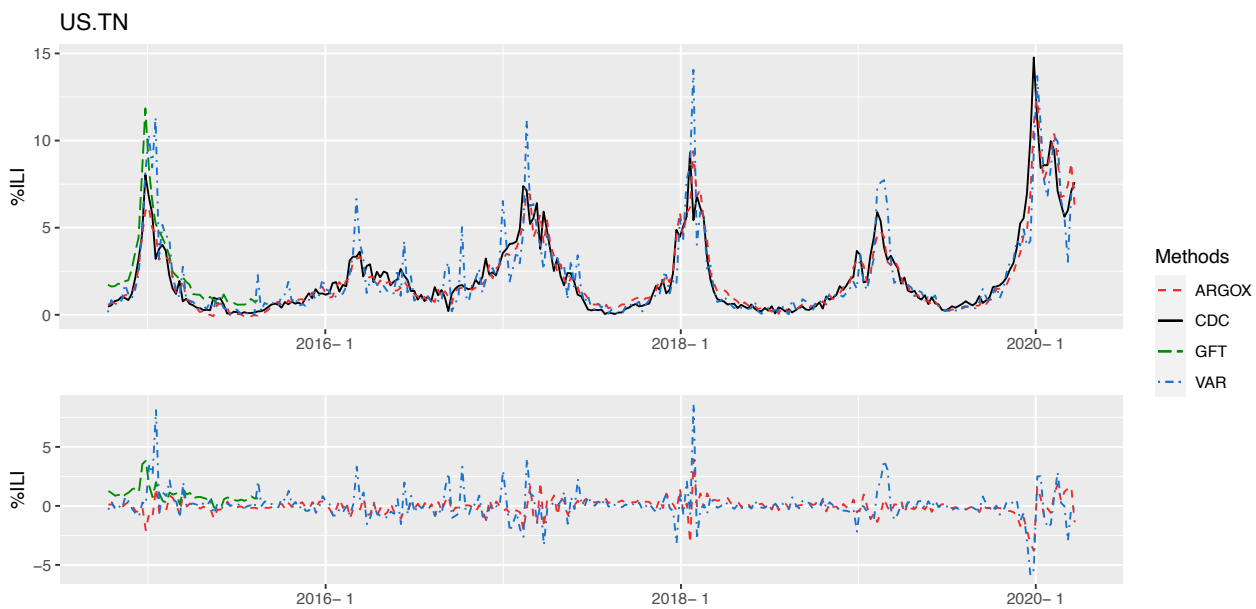

**Figure S42.** Plots of the %ILI estimates (top) and the estimation errors (bottom) for Tennessee (TN).

|                    | Whole period '14-'20 | Overall '14-'17 | '14-'15      | '15-'16      | '16-'17      | '17-'18      | '18-'19      | '19-'20      |
|--------------------|----------------------|-----------------|--------------|--------------|--------------|--------------|--------------|--------------|
| <b>MSE</b>         |                      |                 |              |              |              |              |              |              |
| ARGOX              | <b>0.755</b>         | 0.831           | 1.824        | 0.347        | <b>0.518</b> | <b>1.066</b> | <b>0.364</b> | <b>2.081</b> |
| VAR                | 1.783                | 1.736           | 3.191        | 1.162        | 1.448        | 3.269        | 2.243        | 3.249        |
| GFT                | –                    | –               | <b>1.403</b> | –            | –            | –            | –            | –            |
| Lu et al. (2019)   | –                    | <b>0.783</b>    | 2.074        | 0.432        | 0.562        | –            | –            | –            |
| naive              | 0.997                | 0.958           | 2.121        | <b>0.333</b> | 0.633        | 1.898        | 0.676        | 2.585        |
| <b>MAE</b>         |                      |                 |              |              |              |              |              |              |
| ARGOX              | <b>0.510</b>         | <b>0.537</b>    | <b>0.759</b> | 0.466        | <b>0.540</b> | <b>0.635</b> | <b>0.419</b> | <b>1.054</b> |
| VAR                | 0.738                | 0.757           | 0.961        | 0.709        | 0.829        | 0.959        | 0.858        | 1.152        |
| GFT                | –                    | –               | 0.772        | –            | –            | –            | –            | –            |
| Lu et al. (2019)   | –                    | –               | –            | –            | –            | –            | –            | –            |
| naive              | 0.598                | 0.563           | 0.801        | <b>0.454</b> | 0.577        | 0.936        | 0.634        | 1.177        |
| <b>Correlation</b> |                      |                 |              |              |              |              |              |              |
| ARGOX              | <b>0.959</b>         | 0.914           | 0.882        | 0.812        | <b>0.959</b> | <b>0.972</b> | <b>0.976</b> | <b>0.908</b> |
| VAR                | 0.920                | 0.839           | 0.827        | 0.641        | 0.866        | 0.937        | 0.931        | 0.876        |
| GFT                | –                    | –               | <b>0.936</b> | –            | –            | –            | –            | –            |
| Lu et al. (2019)   | –                    | <b>0.919</b>    | 0.870        | 0.791        | 0.954        | –            | –            | –            |
| naive              | 0.947                | 0.905           | 0.869        | <b>0.816</b> | 0.945        | 0.951        | 0.946        | 0.887        |

**Table S47.** Comparison of different methods for state-level %ILI estimation in Texas (TX). The MSE, MAE, and correlation are reported. The method with the best performance is highlighted in boldface for each metric in each period.

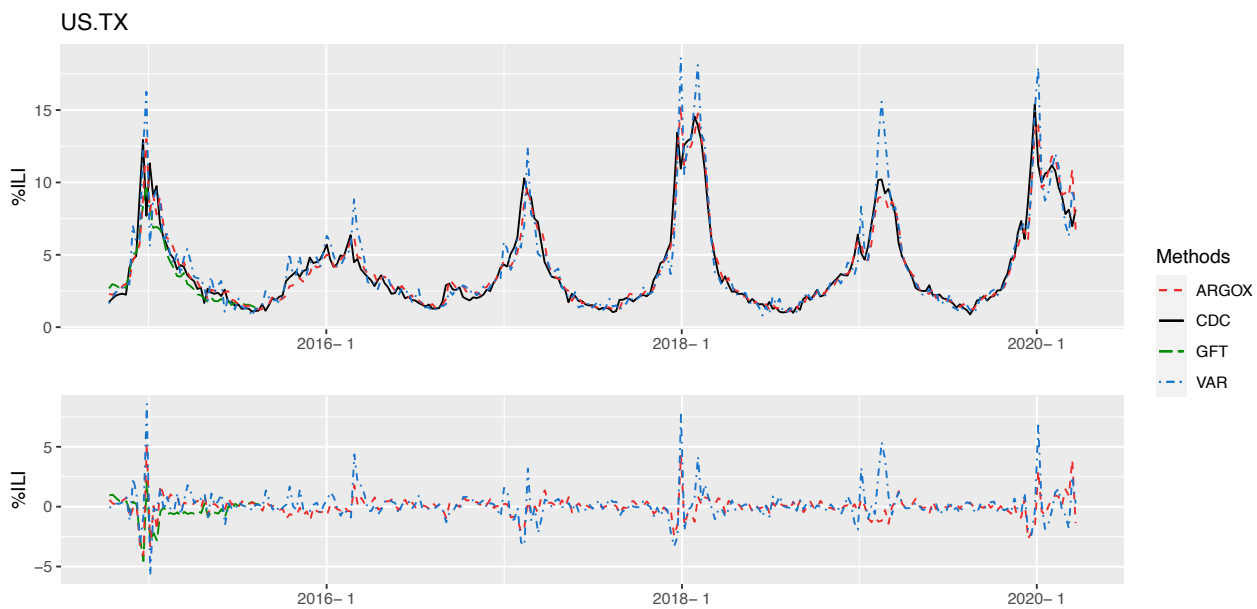

**Figure S43.** Plots of the %ILI estimates (top) and the estimation errors (bottom) for Texas (TX).

|                    | Whole period '14-'20 | Overall '14-'17 | '14-'15      | '15-'16      | '16-'17      | '17-'18      | '18-'19      | '19-'20      |
|--------------------|----------------------|-----------------|--------------|--------------|--------------|--------------|--------------|--------------|
| <b>MSE</b>         |                      |                 |              |              |              |              |              |              |
| ARGOX              | <b>0.202</b>         | <b>0.125</b>    | <b>0.092</b> | <b>0.129</b> | 0.221        | <b>0.142</b> | <b>0.393</b> | <b>0.773</b> |
| VAR                | 0.875                | 0.742           | 0.960        | 1.257        | 0.363        | 0.232        | 1.888        | 2.574        |
| GFT                | –                    | –               | 1.059        | –            | –            | –            | –            | –            |
| Lu et al. (2019)   | –                    | 0.185           | 0.235        | 0.221        | 0.217        | –            | –            | –            |
| naive              | 0.255                | 0.182           | 0.238        | 0.184        | <b>0.193</b> | 0.197        | 0.433        | 0.938        |
| <b>MAE</b>         |                      |                 |              |              |              |              |              |              |
| ARGOX              | <b>0.305</b>         | <b>0.253</b>    | <b>0.224</b> | <b>0.281</b> | 0.321        | <b>0.286</b> | <b>0.476</b> | <b>0.672</b> |
| VAR                | 0.633                | 0.594           | 0.698        | 0.881        | 0.392        | 0.356        | 1.086        | 1.313        |
| GFT                | –                    | –               | 0.930        | –            | –            | –            | –            | –            |
| Lu et al. (2019)   | –                    | –               | –            | –            | –            | –            | –            | –            |
| naive              | 0.334                | 0.293           | 0.334        | 0.329        | <b>0.289</b> | 0.298        | 0.515        | 0.730        |
| <b>Correlation</b> |                      |                 |              |              |              |              |              |              |
| ARGOX              | <b>0.961</b>         | <b>0.946</b>    | <b>0.972</b> | <b>0.917</b> | 0.883        | <b>0.900</b> | <b>0.934</b> | <b>0.915</b> |
| VAR                | 0.840                | 0.818           | 0.795        | 0.698        | 0.858        | 0.847        | 0.704        | 0.720        |
| GFT                | –                    | –               | 0.949        | –            | –            | –            | –            | –            |
| Lu et al. (2019)   | –                    | 0.921           | 0.930        | 0.849        | 0.880        | –            | –            | –            |
| naive              | 0.951                | 0.923           | 0.923        | 0.885        | <b>0.889</b> | 0.868        | 0.921        | 0.900        |

**Table S48.** Comparison of different methods for state-level %ILI estimation in Utah (UT). The MSE, MAE, and correlation are reported. The method with the best performance is highlighted in boldface for each metric in each period.

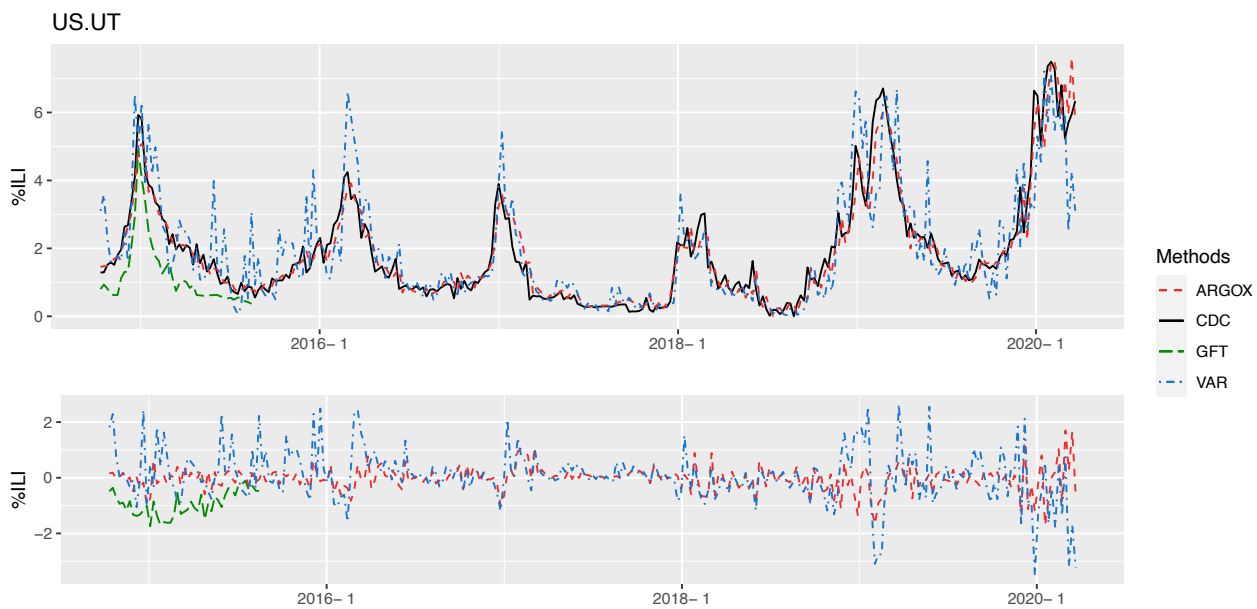

**Figure S44.** Plots of the %ILI estimates (top) and the estimation errors (bottom) for Utah (UT).



|                    | Whole period '14-'20 | Overall '14-'17 | '14-'15      | '15-'16      | '16-'17      | '17-'18      | '18-'19      | '19-'20      |
|--------------------|----------------------|-----------------|--------------|--------------|--------------|--------------|--------------|--------------|
| <b>MSE</b>         |                      |                 |              |              |              |              |              |              |
| ARGOX              | <b>0.241</b>         | <b>0.265</b>    | <b>0.513</b> | 0.181        | 0.101        | <b>0.284</b> | <b>0.287</b> | <b>0.261</b> |
| VAR                | 0.579                | 0.597           | 0.655        | 0.692        | 0.597        | 0.801        | 0.967        | 0.355        |
| GFT                | –                    | –               | 1.330        | –            | –            | –            | –            | –            |
| Lu et al. (2019)   | –                    | 0.317           | 0.845        | <b>0.176</b> | <b>0.101</b> | –            | –            | –            |
| naive              | 0.286                | 0.315           | 0.606        | 0.220        | 0.127        | 0.333        | 0.348        | 0.323        |
| <b>MAE</b>         |                      |                 |              |              |              |              |              |              |
| ARGOX              | <b>0.349</b>         | <b>0.355</b>    | <b>0.492</b> | <b>0.325</b> | <b>0.252</b> | <b>0.407</b> | <b>0.409</b> | <b>0.342</b> |
| VAR                | 0.558                | 0.580           | 0.615        | 0.661        | 0.510        | 0.670        | 0.727        | 0.471        |
| GFT                | –                    | –               | 0.761        | –            | –            | –            | –            | –            |
| Lu et al. (2019)   | –                    | –               | –            | –            | –            | –            | –            | –            |
| naive              | 0.380                | 0.384           | 0.521        | 0.360        | 0.264        | 0.451        | 0.447        | 0.400        |
| <b>Correlation</b> |                      |                 |              |              |              |              |              |              |
| ARGOX              | <b>0.918</b>         | <b>0.902</b>    | <b>0.914</b> | 0.789        | <b>0.799</b> | <b>0.920</b> | <b>0.880</b> | <b>0.946</b> |
| VAR                | 0.824                | 0.790           | 0.883        | 0.609        | 0.478        | 0.840        | 0.683        | 0.928        |
| GFT                | –                    | –               | 0.851        | –            | –            | –            | –            | –            |
| Lu et al. (2019)   | –                    | 0.889           | 0.845        | <b>0.833</b> | 0.782        | –            | –            | –            |
| naive              | 0.905                | 0.886           | 0.896        | 0.753        | 0.754        | 0.909        | 0.859        | 0.939        |

**Table S49.** Comparison of different methods for state-level %ILI estimation in Vermont (VT). The MSE, MAE, and correlation are reported. The method with the best performance is highlighted in boldface for each metric in each period.

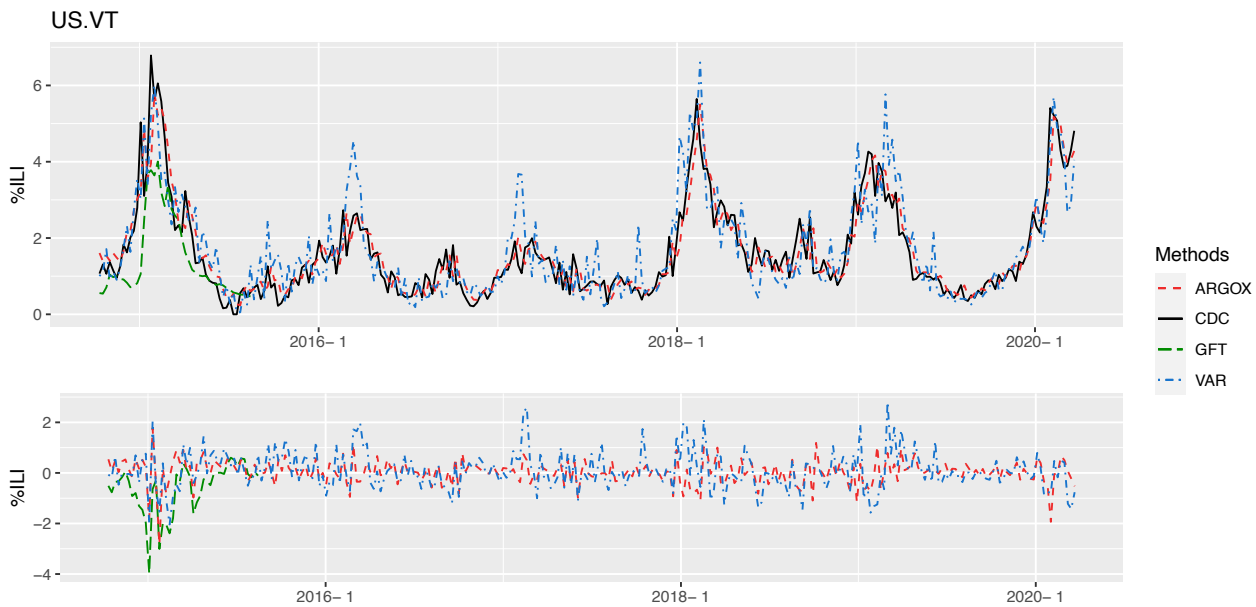

**Figure S45.** Plots of the %ILI estimates (top) and the estimation errors (bottom) for Vermont (VT).

|                    | Whole period '14-'20 | Overall '14-'17 | '14-'15      | '15-'16      | '16-'17      | '17-'18      | '18-'19      | '19-'20      |
|--------------------|----------------------|-----------------|--------------|--------------|--------------|--------------|--------------|--------------|
| <b>MSE</b>         |                      |                 |              |              |              |              |              |              |
| ARGOX              | <b>0.169</b>         | 0.178           | 0.329        | 0.058        | 0.214        | <b>0.376</b> | <b>0.203</b> | <b>0.163</b> |
| VAR                | 0.325                | 0.263           | 0.438        | 0.048        | 0.408        | 0.651        | 0.297        | 0.975        |
| GFT                | –                    | –               | 0.984        | –            | –            | –            | –            | –            |
| Lu et al. (2019)   | –                    | <b>0.108</b>    | <b>0.211</b> | <b>0.024</b> | <b>0.183</b> | –            | –            | –            |
| naïve              | 0.396                | 0.389           | 0.798        | 0.084        | 0.417        | 0.952        | 0.314        | 0.695        |
| <b>MAE</b>         |                      |                 |              |              |              |              |              |              |
| ARGOX              | <b>0.238</b>         | <b>0.232</b>    | <b>0.287</b> | 0.181        | <b>0.307</b> | <b>0.400</b> | <b>0.316</b> | <b>0.310</b> |
| VAR                | 0.327                | 0.299           | 0.373        | <b>0.159</b> | 0.455        | 0.518        | 0.387        | 0.609        |
| GFT                | –                    | –               | 0.497        | –            | –            | –            | –            | –            |
| Lu et al. (2019)   | –                    | –               | –            | –            | –            | –            | –            | –            |
| naïve              | 0.335                | 0.310           | 0.418        | 0.240        | 0.381        | 0.595        | 0.411        | 0.643        |
| <b>Correlation</b> |                      |                 |              |              |              |              |              |              |
| ARGOX              | <b>0.982</b>         | 0.959           | 0.960        | 0.923        | 0.943        | <b>0.983</b> | <b>0.972</b> | <b>0.987</b> |
| VAR                | 0.965                | 0.946           | 0.956        | 0.937        | 0.892        | 0.960        | 0.959        | 0.929        |
| GFT                | –                    | –               | 0.977        | –            | –            | –            | –            | –            |
| Lu et al. (2019)   | –                    | <b>0.975</b>    | <b>0.983</b> | <b>0.970</b> | <b>0.950</b> | –            | –            | –            |
| naïve              | 0.955                | 0.907           | 0.895        | 0.889        | 0.885        | 0.941        | 0.956        | 0.948        |

**Table S50.** Comparison of different methods for state-level %ILI estimation in Virginia (VA). The MSE, MAE, and correlation are reported. The method with the best performance is highlighted in boldface for each metric in each period.

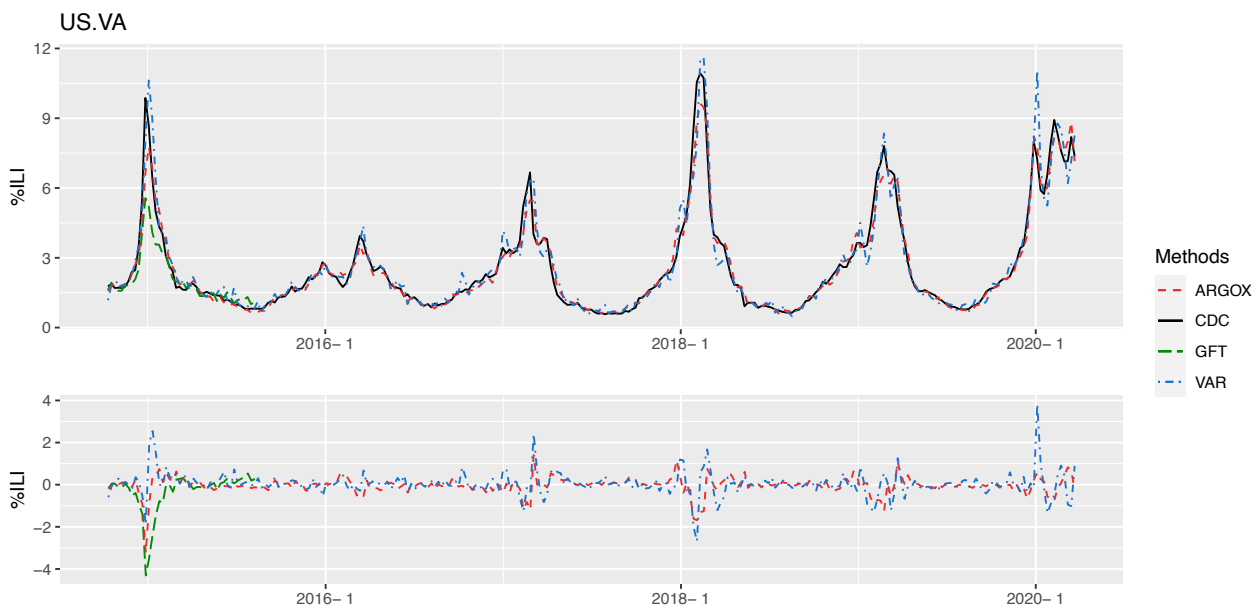

**Figure S46.** Plots of the %ILI estimates (top) and the estimation errors (bottom) for Virginia (VA).

|                    | Whole period '14-'20 | Overall '14-'17 | '14-'15      | '15-'16      | '16-'17      | '17-'18      | '18-'19      | '19-'20      |
|--------------------|----------------------|-----------------|--------------|--------------|--------------|--------------|--------------|--------------|
| <b>MSE</b>         |                      |                 |              |              |              |              |              |              |
| ARGOX              | <b>0.192</b>         | 0.141           | 0.122        | <b>0.092</b> | 0.312        | <b>0.411</b> | <b>0.211</b> | <b>0.552</b> |
| VAR                | 0.561                | 0.257           | 0.305        | 0.213        | 0.401        | 0.558        | 0.322        | 3.864        |
| GFT                | –                    | –               | 0.562        | –            | –            | –            | –            | –            |
| Lu et al. (2019)   | –                    | <b>0.115</b>    | <b>0.076</b> | 0.115        | <b>0.269</b> | –            | –            | –            |
| naïve              | 0.263                | 0.157           | 0.145        | 0.114        | 0.322        | 0.551        | 0.302        | 0.966        |
| <b>MAE</b>         |                      |                 |              |              |              |              |              |              |
| ARGOX              | <b>0.261</b>         | <b>0.242</b>    | <b>0.237</b> | <b>0.252</b> | 0.352        | <b>0.325</b> | <b>0.289</b> | <b>0.585</b> |
| VAR                | 0.406                | 0.337           | 0.396        | 0.364        | 0.383        | 0.450        | 0.329        | 1.431        |
| GFT                | –                    | –               | 0.654        | –            | –            | –            | –            | –            |
| Lu et al. (2019)   | –                    | –               | –            | –            | –            | –            | –            | –            |
| naïve              | 0.304                | 0.262           | 0.277        | 0.283        | <b>0.352</b> | 0.415        | 0.358        | 0.723        |
| <b>Correlation</b> |                      |                 |              |              |              |              |              |              |
| ARGOX              | <b>0.954</b>         | 0.901           | 0.939        | <b>0.842</b> | 0.825        | <b>0.883</b> | <b>0.914</b> | <b>0.951</b> |
| VAR                | 0.861                | 0.836           | 0.867        | 0.604        | 0.796        | 0.848        | 0.882        | 0.698        |
| GFT                | –                    | –               | 0.963        | –            | –            | –            | –            | –            |
| Lu et al. (2019)   | –                    | <b>0.913</b>    | <b>0.967</b> | 0.798        | 0.823        | –            | –            | –            |
| naïve              | 0.937                | 0.894           | 0.928        | 0.809        | <b>0.834</b> | 0.850        | 0.876        | 0.902        |

**Table S51.** Comparison of different methods for state-level %ILI estimation in Washington (WA). The MSE, MAE, and correlation are reported. The method with the best performance is highlighted in boldface for each metric in each period.

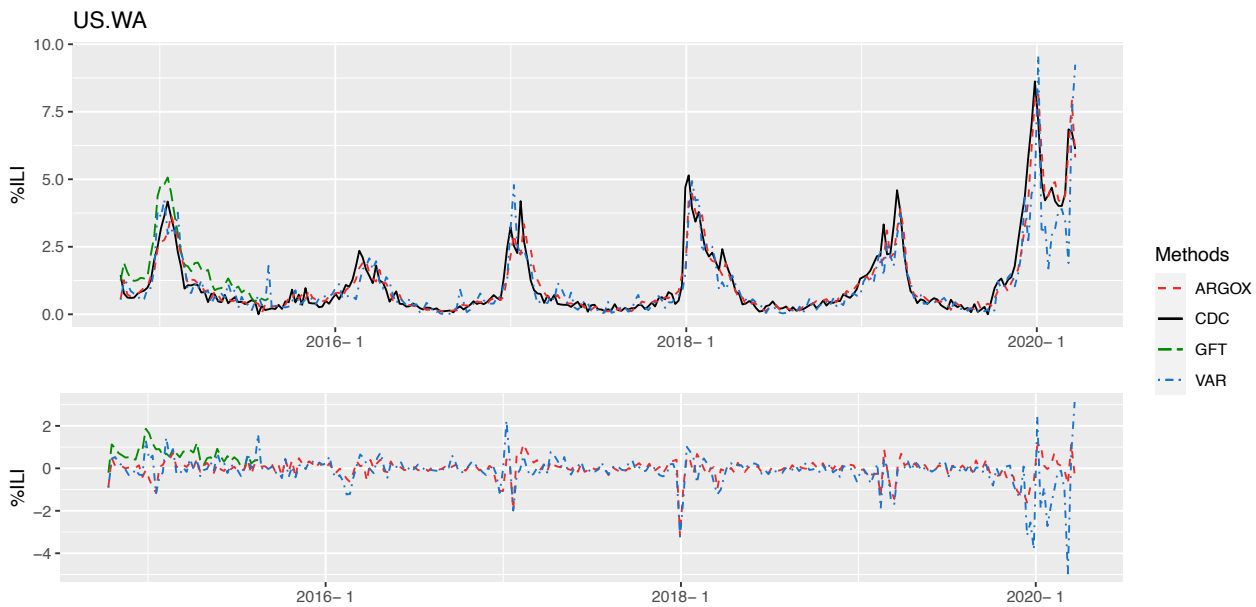

**Figure S47.** Plots of the %ILI estimates (top) and the estimation errors (bottom) for Washington (WA).

|                    | Whole period '14-'20 | Overall '14-'17 | '14-'15      | '15-'16      | '16-'17      | '17-'18      | '18-'19      | '19-'20      |
|--------------------|----------------------|-----------------|--------------|--------------|--------------|--------------|--------------|--------------|
| <b>MSE</b>         |                      |                 |              |              |              |              |              |              |
| ARGOX              | <b>0.264</b>         | <b>0.171</b>    | 0.303        | <b>0.119</b> | <b>0.140</b> | <b>0.702</b> | <b>0.383</b> | <b>0.605</b> |
| VAR                | 0.600                | 0.307           | 0.341        | 0.222        | 0.523        | 1.791        | 0.489        | 2.093        |
| GFT                | –                    | –               | 0.974        | –            | –            | –            | –            | –            |
| Lu et al. (2019)   | –                    | 0.179           | <b>0.264</b> | 0.185        | –            | –            | –            | –            |
| naive              | 0.413                | 0.261           | 0.520        | 0.153        | 0.181        | 1.212        | 0.478        | 1.000        |
| <b>MAE</b>         |                      |                 |              |              |              |              |              |              |
| ARGOX              | <b>0.314</b>         | <b>0.285</b>    | <b>0.345</b> | <b>0.274</b> | 0.302        | <b>0.536</b> | <b>0.417</b> | <b>0.518</b> |
| VAR                | 0.458                | 0.385           | 0.405        | 0.355        | 0.529        | 0.778        | 0.522        | 1.101        |
| GFT                | –                    | –               | 0.909        | –            | –            | –            | –            | –            |
| Lu et al. (2019)   | –                    | –               | –            | –            | –            | –            | –            | –            |
| naive              | 0.355                | 0.317           | 0.442        | 0.281        | <b>0.298</b> | 0.649        | 0.437        | 0.645        |
| <b>Correlation</b> |                      |                 |              |              |              |              |              |              |
| ARGOX              | <b>0.957</b>         | 0.958           | 0.967        | <b>0.826</b> | <b>0.939</b> | <b>0.929</b> | <b>0.925</b> | <b>0.943</b> |
| VAR                | 0.920                | 0.939           | 0.964        | 0.787        | 0.896        | 0.894        | 0.909        | 0.835        |
| GFT                | –                    | –               | 0.969        | –            | –            | –            | –            | –            |
| Lu et al. (2019)   | –                    | <b>0.965</b>    | <b>0.979</b> | 0.793        | –            | –            | –            | –            |
| naive              | 0.933                | 0.933           | 0.936        | 0.798        | 0.921        | 0.876        | 0.907        | 0.912        |

**Table S52.** Comparison of different methods for state-level %ILI estimation in West Virginia (WV). The MSE, MAE, and correlation are reported. The method with the best performance is highlighted in boldface for each metric in each period.

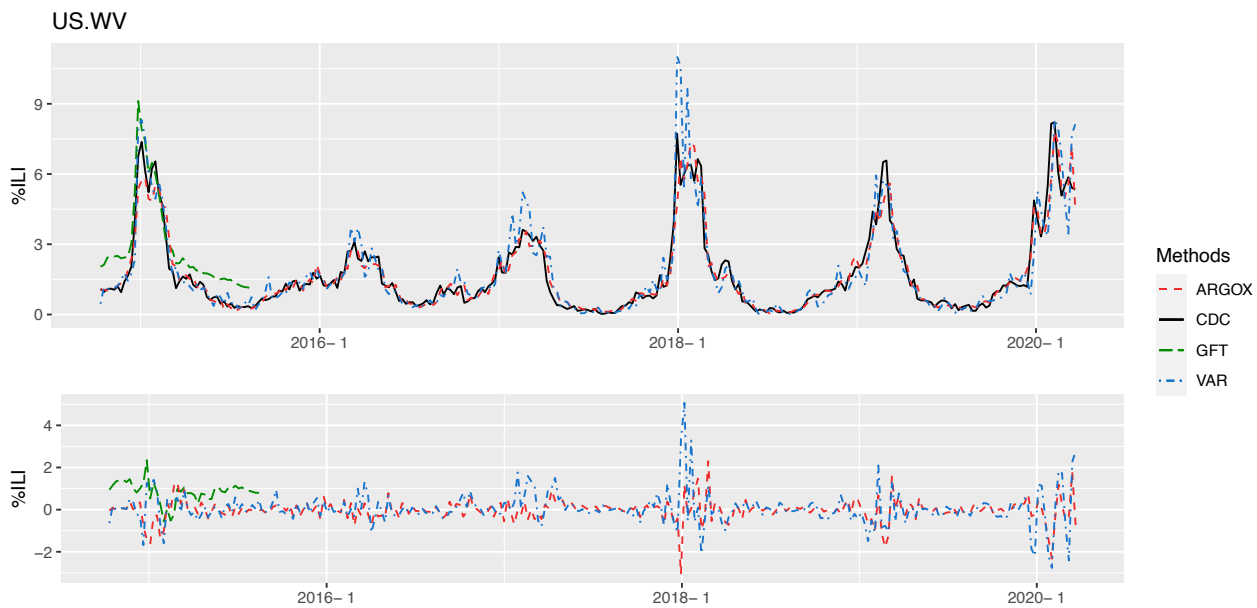

**Figure S48.** Plots of the %ILI estimates (top) and the estimation errors (bottom) for West Virginia (WV).

|                    | Whole period '14-'20 | Overall '14-'17 | '14-'15      | '15-'16      | '16-'17      | '17-'18      | '18-'19      | '19-'20      |
|--------------------|----------------------|-----------------|--------------|--------------|--------------|--------------|--------------|--------------|
| <b>MSE</b>         |                      |                 |              |              |              |              |              |              |
| ARGOX              | <b>0.142</b>         | <b>0.184</b>    | <b>0.263</b> | <b>0.111</b> | <b>0.144</b> | <b>0.138</b> | <b>0.077</b> | <b>0.182</b> |
| VAR                | 0.870                | 0.802           | 1.446        | 0.474        | 0.681        | 1.958        | 0.343        | 0.788        |
| GFT                | –                    | –               | 0.562        | –            | –            | –            | –            | –            |
| Lu et al. (2019)   | –                    | 0.271           | 0.630        | 0.144        | 0.162        | –            | –            | –            |
| naive              | 0.203                | 0.274           | 0.458        | 0.120        | 0.180        | 0.204        | 0.086        | 0.243        |
| <b>MAE</b>         |                      |                 |              |              |              |              |              |              |
| ARGOX              | <b>0.276</b>         | <b>0.320</b>    | <b>0.380</b> | <b>0.260</b> | <b>0.311</b> | <b>0.300</b> | <b>0.216</b> | <b>0.328</b> |
| VAR                | 0.583                | 0.618           | 0.881        | 0.557        | 0.530        | 0.891        | 0.432        | 0.666        |
| GFT                | –                    | –               | 0.604        | –            | –            | –            | –            | –            |
| Lu et al. (2019)   | –                    | –               | –            | –            | –            | –            | –            | –            |
| naive              | 0.308                | 0.360           | 0.418        | 0.298        | 0.344        | 0.344        | 0.224        | 0.381        |
| <b>Correlation</b> |                      |                 |              |              |              |              |              |              |
| ARGOX              | <b>0.956</b>         | <b>0.928</b>    | <b>0.945</b> | <b>0.752</b> | <b>0.895</b> | <b>0.951</b> | <b>0.888</b> | <b>0.974</b> |
| VAR                | 0.779                | 0.738           | 0.695        | 0.543        | 0.757        | 0.749        | 0.475        | 0.860        |
| GFT                | –                    | –               | 0.897        | –            | –            | –            | –            | –            |
| Lu et al. (2019)   | –                    | 0.898           | 0.868        | 0.696        | 0.895        | –            | –            | –            |
| naive              | 0.937                | 0.896           | 0.902        | 0.743        | 0.869        | 0.922        | 0.885        | 0.962        |

**Table S53.** Comparison of different methods for state-level %ILI estimation in Wisconsin (WI). The MSE, MAE, and correlation are reported. The method with the best performance is highlighted in boldface for each metric in each period.

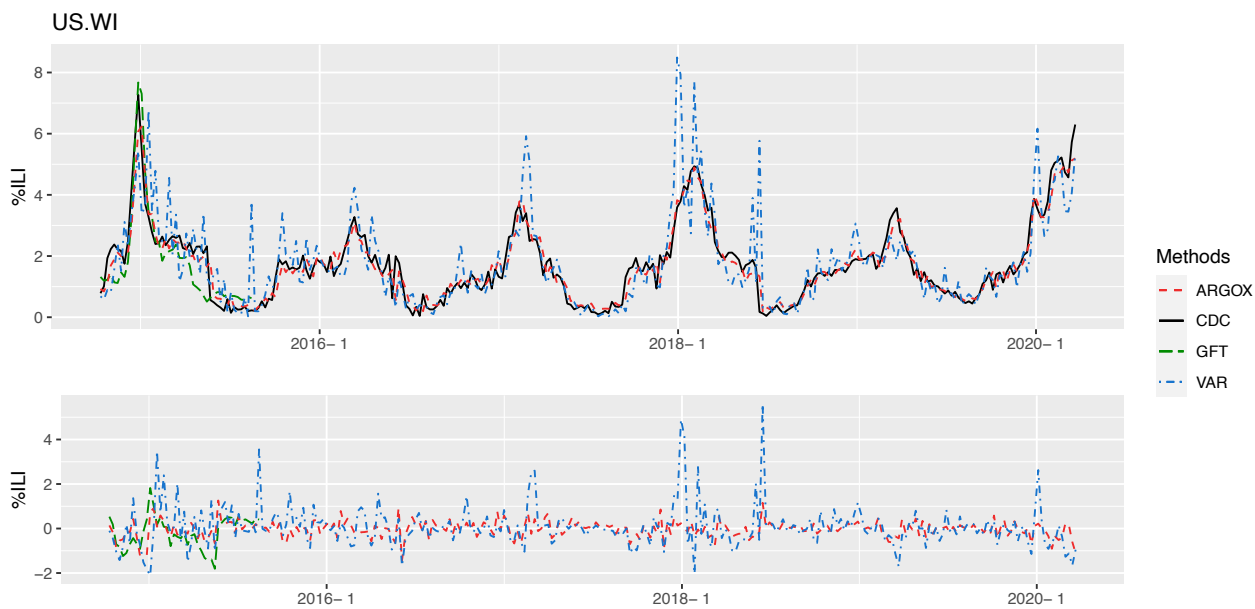

**Figure S49.** Plots of the %ILI estimates (top) and the estimation errors (bottom) for Wisconsin (WI).

|                    | Whole period '14-'20 | Overall '14-'17 | '14-'15      | '15-'16      | '16-'17      | '17-'18      | '18-'19      | '19-'20      |
|--------------------|----------------------|-----------------|--------------|--------------|--------------|--------------|--------------|--------------|
| <b>MSE</b>         |                      |                 |              |              |              |              |              |              |
| ARGOX              | <b>0.276</b>         | <b>0.143</b>    | 0.130        | <b>0.128</b> | <b>0.278</b> | <b>0.468</b> | <b>0.556</b> | <b>0.912</b> |
| VAR                | 0.739                | 0.473           | 0.489        | 0.290        | 0.946        | 1.503        | 1.603        | 1.554        |
| GFT                | –                    | –               | 0.318        | –            | –            | –            | –            | –            |
| Lu et al. (2019)   | –                    | –               | –            | –            | –            | –            | –            | –            |
| naive              | 0.325                | 0.156           | <b>0.115</b> | 0.139        | 0.339        | 0.636        | 0.681        | 0.992        |
| <b>MAE</b>         |                      |                 |              |              |              |              |              |              |
| ARGOX              | <b>0.341</b>         | <b>0.260</b>    | 0.277        | <b>0.241</b> | <b>0.394</b> | <b>0.472</b> | <b>0.558</b> | 0.711        |
| VAR                | 0.503                | 0.402           | 0.393        | 0.390        | 0.615        | 0.919        | 0.730        | 0.887        |
| GFT                | –                    | –               | 0.480        | –            | –            | –            | –            | –            |
| Lu et al. (2019)   | –                    | –               | –            | –            | –            | –            | –            | –            |
| naive              | 0.362                | 0.271           | <b>0.248</b> | 0.265        | 0.448        | 0.585        | 0.593        | <b>0.690</b> |
| <b>Correlation</b> |                      |                 |              |              |              |              |              |              |
| ARGOX              | <b>0.947</b>         | <b>0.921</b>    | 0.938        | <b>0.884</b> | <b>0.866</b> | <b>0.961</b> | <b>0.908</b> | <b>0.864</b> |
| VAR                | 0.880                | 0.846           | 0.930        | 0.728        | 0.740        | 0.848        | 0.862        | 0.803        |
| GFT                | –                    | –               | 0.891        | –            | –            | –            | –            | –            |
| Lu et al. (2019)   | –                    | –               | –            | –            | –            | –            | –            | –            |
| naive              | 0.939                | 0.918           | <b>0.946</b> | 0.881        | 0.842        | 0.940        | 0.890        | 0.858        |

**Table S54.** Comparison of different methods for state-level %ILI estimation in Wyoming (WY). The MSE, MAE, and correlation are reported. The method with the best performance is highlighted in boldface for each metric in each period.

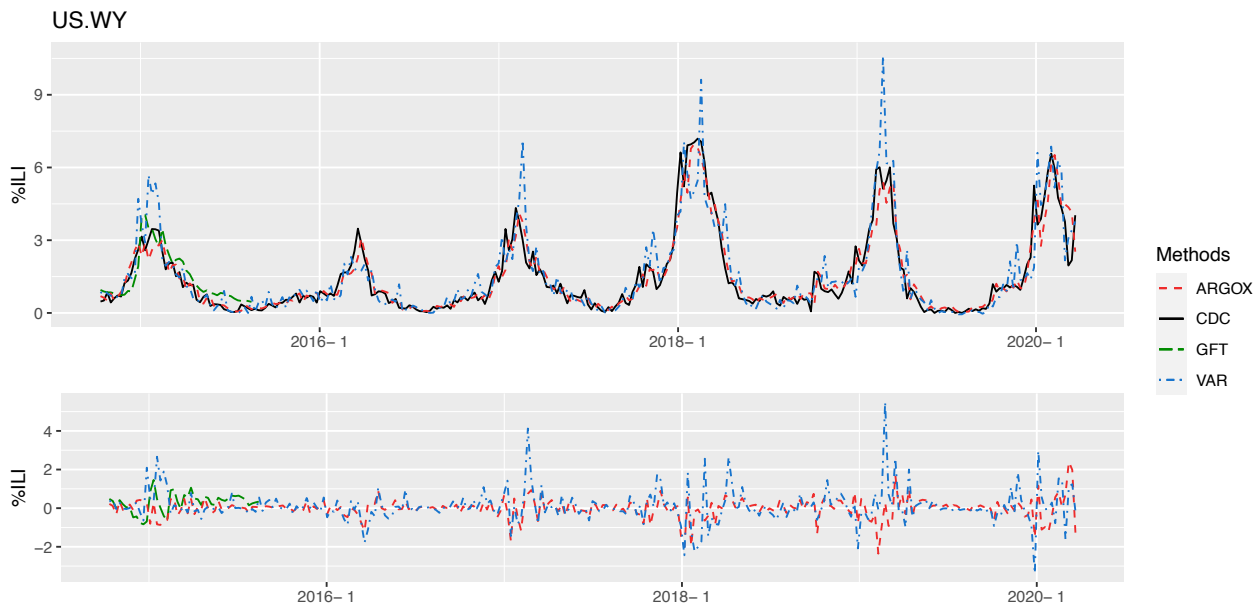

**Figure S50.** Plots of the %ILI estimates (top) and the estimation errors (bottom) for Wyoming (WY).

|                    | Whole period '14-'20 | Overall '14-'17 | '14-'15      | '15-'16      | '16-'17      | '17-'18      | '18-'19      | '19-'20      |
|--------------------|----------------------|-----------------|--------------|--------------|--------------|--------------|--------------|--------------|
| <b>MSE</b>         |                      |                 |              |              |              |              |              |              |
| ARGOX              | <b>0.204</b>         | <b>0.063</b>    | <b>0.041</b> | <b>0.041</b> | <b>0.154</b> | <b>0.258</b> | <b>0.045</b> | 1.599        |
| VAR                | 0.242                | 0.105           | 0.080        | 0.097        | 0.187        | 0.339        | 0.187        | <b>1.399</b> |
| GFT                | –                    | –               | 0.257        | –            | –            | –            | –            | –            |
| Lu et al. (2019)   | –                    | –               | –            | –            | –            | –            | –            | –            |
| naïve              | 0.269                | 0.072           | 0.048        | 0.069        | 0.154        | 0.581        | 0.105        | 1.768        |
| <b>MAE</b>         |                      |                 |              |              |              |              |              |              |
| ARGOX              | <b>0.220</b>         | <b>0.178</b>    | <b>0.153</b> | <b>0.172</b> | 0.285        | <b>0.347</b> | <b>0.167</b> | <b>0.632</b> |
| VAR                | 0.301                | 0.238           | 0.223        | 0.250        | 0.299        | 0.386        | 0.336        | 0.745        |
| GFT                | –                    | –               | 0.436        | –            | –            | –            | –            | –            |
| Lu et al. (2019)   | –                    | –               | –            | –            | –            | –            | –            | –            |
| naïve              | 0.267                | 0.188           | 0.168        | 0.207        | <b>0.273</b> | 0.454        | 0.246        | 0.849        |
| <b>Correlation</b> |                      |                 |              |              |              |              |              |              |
| ARGOX              | <b>0.959</b>         | <b>0.956</b>    | <b>0.962</b> | <b>0.956</b> | 0.907        | <b>0.972</b> | <b>0.971</b> | 0.887        |
| VAR                | 0.949                | 0.934           | 0.938        | 0.907        | <b>0.909</b> | 0.960        | 0.882        | <b>0.898</b> |
| GFT                | –                    | –               | 0.949        | –            | –            | –            | –            | –            |
| Lu et al. (2019)   | –                    | –               | –            | –            | –            | –            | –            | –            |
| naïve              | 0.944                | 0.949           | 0.950        | 0.929        | 0.902        | 0.928        | 0.929        | 0.878        |

**Table S55.** Comparison of different methods for state-level %ILI estimation in New York City (NYC). The MSE, MAE, and correlation are reported. The method with the best performance is highlighted in boldface for each metric in each period.

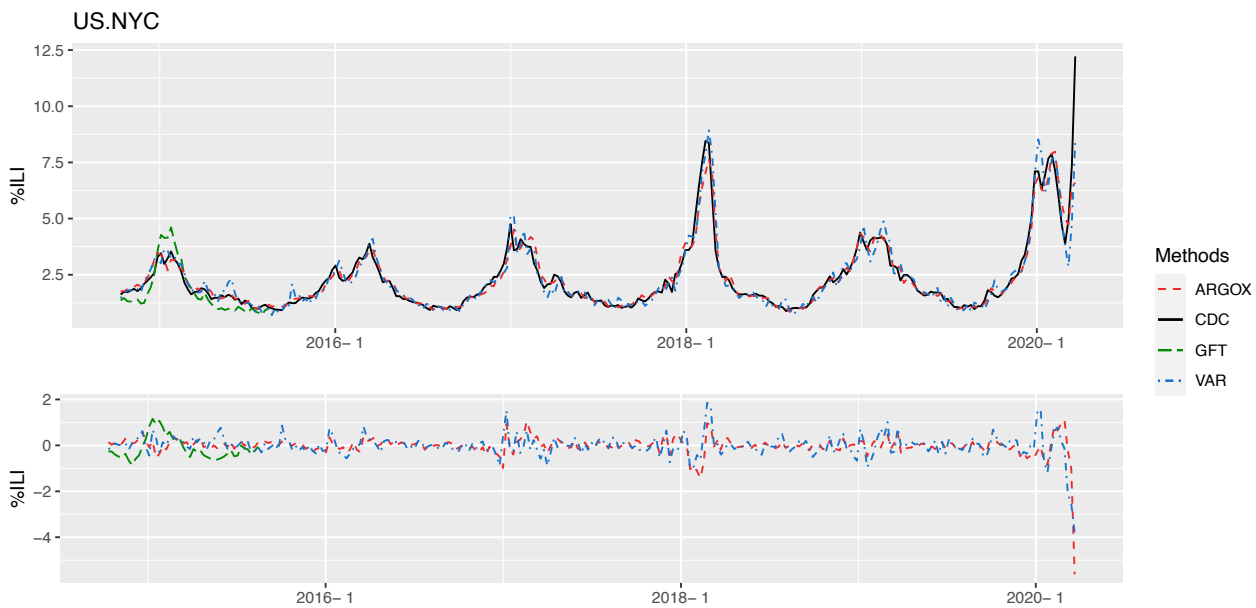

**Figure S51.** Plots of the %ILI estimates (top) and the estimation errors (bottom) for New York City (NYC).
